# Supplementary material for: Regional Greenland Accumulation Variability from Operation IceBridge Airborne Accumulation Radar
Source: Copernicus journal article supplement (doi:10.5194/tc-2016-248), 2016-11-14
Supplement: Supplementary file 1 [file ALL ICEBRIDGE DATA.xlsx]

## Sheet: Sheet1
Latitude	Longtidue	2014-2004	2004-1997	1997-1991	1991-1987	1987-1976	1976-1968	1968-1962	1962-1957	1957-1950	1950-1941	1941-1921	1921-1899	1899-1880	1880-1855	1855-1817	1817-1778	1778-1746	1746-1712
72.4953	-37.7997	0.249332	0.220333	0.231089	0.160964	0.194854	0.260114	0.198563	0.235789	0.2307	0.228288	0.225393	0.207202	0.234045	0.234741	0.224295	0.229176	0.218569	0.221331
72.4927	-37.8047	0.249335	0.224397	0.225402	0.181199	0.188366	0.260119	0.211479	0.236017	0.230907	0.228475	0.221346	0.207207	0.23893	0.234838	0.224367	0.230445	0.217068	0.22136
72.4888	-37.8121	0.249338	0.220321	0.231113	0.211603	0.178615	0.260125	0.224413	0.228567	0.231012	0.233283	0.221503	0.207332	0.236611	0.23673	0.225691	0.231741	0.215581	0.222866
72.4862	-37.8171	0.249342	0.207815	0.247877	0.231901	0.172106	0.269725	0.211705	0.228572	0.231018	0.233289	0.225722	0.207455	0.231847	0.240418	0.225763	0.230577	0.217159	0.222896
72.4823	-37.8245	0.249345	0.207815	0.24788	0.252236	0.155514	0.298118	0.179671	0.243706	0.248503	0.214723	0.229865	0.20752	0.236789	0.240565	0.224613	0.228195	0.221837	0.22294
72.4798	-37.8295	0.249348	0.216249	0.236796	0.25224	0.148816	0.307417	0.166761	0.25882	0.260182	0.196056	0.233925	0.209528	0.239295	0.238819	0.225905	0.225813	0.224958	0.222969
72.4759	-37.8369	0.249352	0.228458	0.219713	0.252244	0.148819	0.307423	0.160315	0.266371	0.260188	0.172552	0.244052	0.215547	0.232139	0.244355	0.224754	0.22343	0.22652	0.227375
72.4734	-37.8418	0.249355	0.228459	0.225568	0.24224	0.148822	0.307429	0.160319	0.266377	0.260194	0.163167	0.248099	0.217559	0.229754	0.246205	0.226046	0.221046	0.229641	0.227405
72.4695	-37.8493	0.249358	0.21625	0.260243	0.212164	0.15888	0.29349	0.173227	0.251286	0.2602	0.17256	0.246171	0.22164	0.225034	0.244413	0.229817	0.217467	0.232762	0.230362
72.467	-37.8542	0.249362	0.220324	0.260449	0.212288	0.169059	0.27486	0.186155	0.236171	0.260206	0.191365	0.2423	0.221772	0.225143	0.240823	0.229821	0.219905	0.232802	0.230392
72.4632	-37.8617	0.249365	0.236592	0.237613	0.242843	0.182842	0.232535	0.205372	0.228608	0.260212	0.219636	0.234358	0.211858	0.237216	0.237229	0.229826	0.225997	0.229776	0.230436
72.4607	-37.8666	0.249369	0.240665	0.231895	0.25305	0.193095	0.204176	0.218102	0.228613	0.260218	0.229077	0.230301	0.205843	0.244389	0.240924	0.227385	0.230873	0.22361	0.233366
72.4569	-37.874	0.249372	0.240666	0.231898	0.253054	0.196484	0.194687	0.224463	0.228619	0.2719	0.224547	0.228273	0.195821	0.25633	0.246467	0.223719	0.235751	0.22212	0.23341
72.4532	-37.8814	0.249375	0.240667	0.220159	0.27314	0.182958	0.21346	0.224468	0.228624	0.289448	0.210643	0.228279	0.187817	0.265868	0.246472	0.224979	0.234561	0.225244	0.233441
72.4507	-37.8863	0.249379	0.240667	0.208441	0.293191	0.169462	0.232191	0.224473	0.2363	0.283731	0.210649	0.228284	0.187822	0.270765	0.242879	0.227496	0.232175	0.226808	0.233457
72.4469	-37.8936	0.249382	0.236595	0.220024	0.252596	0.16245	0.255535	0.224478	0.25935	0.266542	0.210654	0.22829	0.193832	0.270968	0.237481	0.230013	0.229789	0.231493	0.2335
72.4444	-37.8984	0.249385	0.228463	0.243188	0.191857	0.172147	0.260199	0.224483	0.267048	0.260809	0.210659	0.228295	0.201854	0.261431	0.239332	0.228794	0.229792	0.233057	0.233516
72.4406	-37.9057	0.249389	0.220339	0.260462	0.151377	0.185275	0.265144	0.21177	0.267055	0.260815	0.210664	0.234637	0.200026	0.256659	0.244879	0.226383	0.232258	0.229991	0.233532
72.4381	-37.9105	0.249392	0.22034	0.260466	0.15138	0.192004	0.265432	0.205504	0.267184	0.255084	0.210669	0.238872	0.192116	0.261441	0.246733	0.227676	0.23231	0.230028	0.233562
72.4343	-37.9176	0.249395	0.22034	0.26047	0.171665	0.198977	0.261179	0.20581	0.267557	0.237854	0.210674	0.238878	0.190115	0.26873	0.243135	0.230196	0.23358	0.228522	0.233592
72.4318	-37.9223	0.249399	0.220341	0.260474	0.212313	0.19269	0.261459	0.199531	0.267686	0.232106	0.210679	0.238884	0.194131	0.268863	0.239534	0.232715	0.233632	0.225436	0.233594
72.4281	-37.9295	0.249402	0.220341	0.260478	0.253092	0.18299	0.261601	0.193143	0.267692	0.232111	0.210684	0.23889	0.204173	0.259374	0.243281	0.23282	0.230046	0.228562	0.232158
72.4256	-37.9342	0.249405	0.220341	0.260481	0.253096	0.182993	0.261606	0.193147	0.267698	0.232117	0.210689	0.234666	0.212099	0.254595	0.246986	0.230372	0.23005	0.231689	0.232187
72.4218	-37.9414	0.252637	0.216262	0.260485	0.2531	0.182997	0.256787	0.186577	0.282875	0.232122	0.210694	0.234671	0.204067	0.264168	0.246991	0.230376	0.230053	0.233254	0.233669
72.4193	-37.9462	0.259124	0.208104	0.260489	0.253105	0.176243	0.256526	0.186403	0.298031	0.232128	0.210699	0.238907	0.192143	0.273727	0.246996	0.230381	0.230056	0.233257	0.233671
72.4156	-37.9534	0.265648	0.208045	0.249095	0.283734	0.156305	0.260937	0.192691	0.305605	0.232133	0.210704	0.245259	0.184285	0.276119	0.247001	0.230385	0.23006	0.236385	0.232234
72.4118	-37.9607	0.265651	0.220216	0.231946	0.3042	0.149742	0.260943	0.192695	0.305611	0.232139	0.210709	0.251619	0.188459	0.266637	0.245203	0.230389	0.230063	0.241076	0.232276
72.4093	-37.9655	0.265655	0.220217	0.231949	0.304206	0.149744	0.260948	0.199168	0.298051	0.237995	0.215522	0.249677	0.192536	0.264373	0.241599	0.230393	0.230067	0.241079	0.233745
72.4056	-37.9728	0.265659	0.220217	0.231953	0.304211	0.149747	0.260953	0.218604	0.275324	0.255574	0.215784	0.241455	0.192486	0.271679	0.237993	0.232914	0.231337	0.236447	0.235213
72.4031	-37.9776	0.265663	0.220218	0.231956	0.304216	0.156491	0.256419	0.218722	0.267741	0.261446	0.211139	0.239343	0.190428	0.276466	0.237998	0.235437	0.231388	0.234922	0.236696
72.3993	-37.9849	0.265666	0.220218	0.231959	0.304221	0.166627	0.256825	0.199575	0.267747	0.261452	0.211144	0.239349	0.188425	0.278861	0.243554	0.233022	0.231414	0.238069	0.235272
72.3968	-37.9897	0.26567	0.220219	0.231963	0.304226	0.16663	0.261655	0.193186	0.267753	0.261458	0.220614	0.235279	0.192445	0.274089	0.247262	0.230572	0.233859	0.236543	0.235287
72.3931	-37.9969	0.265674	0.212101	0.243408	0.314462	0.173494	0.24759	0.19319	0.267759	0.261464	0.230096	0.231204	0.20049	0.264526	0.247267	0.230576	0.236305	0.235017	0.238237
72.3906	-38.0017	0.265678	0.204	0.254831	0.334957	0.173699	0.238196	0.193194	0.267765	0.26147	0.220625	0.23529	0.204516	0.259744	0.247272	0.233099	0.236356	0.235055	0.238266
72.3869	-38.0089	0.265681	0.199948	0.260527	0.355488	0.167116	0.238201	0.193199	0.267771	0.261476	0.211164	0.245729	0.202681	0.254958	0.247278	0.238144	0.235233	0.233545	0.239762
72.3844	-38.0137	0.265685	0.199948	0.26053	0.355494	0.173898	0.228803	0.193203	0.267777	0.261482	0.211169	0.249979	0.19877	0.254964	0.249134	0.239442	0.234061	0.233565	0.239778
72.3807	-38.0209	0.265689	0.199949	0.260534	0.3555	0.18409	0.214675	0.193207	0.267784	0.261489	0.206441	0.252023	0.198774	0.259879	0.251085	0.238285	0.235333	0.233619	0.23982
72.3782	-38.0256	0.265692	0.199949	0.272289	0.335409	0.177299	0.224105	0.193211	0.26779	0.261495	0.196985	0.260344	0.194863	0.264798	0.24933	0.239583	0.23416	0.233639	0.241303
72.3745	-38.0327	0.265696	0.199949	0.28996	0.305198	0.167129	0.238221	0.193216	0.267796	0.279103	0.173583	0.270789	0.188985	0.267262	0.247527	0.243372	0.230565	0.236771	0.238397
72.3707	-38.0398	0.2657	0.212103	0.272853	0.305203	0.177305	0.224115	0.19322	0.267802	0.290863	0.164267	0.270795	0.18899	0.267268	0.247532	0.243376	0.233013	0.238373	0.238438
72.3682	-38.0445	0.265704	0.220223	0.261415	0.305208	0.190902	0.205263	0.193224	0.267808	0.29087	0.164271	0.270802	0.188994	0.267274	0.251244	0.240924	0.235462	0.23528	0.241377
72.3644	-38.0516	0.265707	0.220224	0.261419	0.305213	0.201122	0.195918	0.186837	0.275524	0.285124	0.173725	0.266742	0.188998	0.26728	0.256813	0.237242	0.236688	0.23843	0.237014
72.3619	-38.0564	0.265711	0.224285	0.255701	0.305219	0.201126	0.205582	0.180528	0.283378	0.273612	0.183191	0.260551	0.190965	0.272201	0.253202	0.238507	0.235492	0.241564	0.234105
72.3582	-38.0635	0.265715	0.236495	0.238507	0.305224	0.20113	0.215261	0.187199	0.276045	0.262085	0.202137	0.246033	0.196849	0.279585	0.247779	0.242298	0.231895	0.241567	0.234107
72.3557	-38.0683	0.265718	0.240575	0.232767	0.305229	0.201134	0.215265	0.193708	0.268442	0.262091	0.216369	0.237792	0.198812	0.279591	0.247784	0.243565	0.230698	0.241569	0.234109
72.3519	-38.0754	0.265722	0.240575	0.23277	0.305234	0.201138	0.21527	0.193712	0.268448	0.262098	0.230615	0.231666	0.198816	0.279597	0.247789	0.243569	0.233147	0.243173	0.229744
72.3494	-38.0802	0.265726	0.240576	0.232774	0.305239	0.201142	0.215274	0.193716	0.268454	0.262104	0.235373	0.229625	0.198821	0.279604	0.247794	0.243573	0.235597	0.24321	0.223897
72.3457	-38.0874	0.26573	0.240577	0.232777	0.305245	0.201146	0.215279	0.193721	0.268461	0.26211	0.235379	0.229631	0.198826	0.27961	0.247799	0.243577	0.236824	0.241664	0.219495
72.3432	-38.0921	0.265733	0.240577	0.232781	0.30525	0.201149	0.215284	0.193725	0.268467	0.262116	0.225882	0.23585	0.198886	0.28214	0.244184	0.243582	0.236828	0.241667	0.219497
72.3395	-38.0993	0.265737	0.240578	0.232784	0.305255	0.201153	0.215288	0.193729	0.268473	0.262122	0.211652	0.248357	0.199054	0.28234	0.238753	0.239799	0.240432	0.236971	0.222399
72.337	-38.1041	0.265741	0.240579	0.232788	0.30526	0.201157	0.215293	0.200236	0.260872	0.262128	0.211658	0.250489	0.199114	0.279946	0.238758	0.237279	0.242835	0.233842	0.222377
72.3332	-38.1113	0.265744	0.24058	0.232791	0.305266	0.201161	0.215297	0.219774	0.238024	0.262135	0.211663	0.250495	0.199118	0.279952	0.242474	0.234825	0.242839	0.232279	0.2209
72.3295	-38.1185	0.265748	0.24058	0.232795	0.305271	0.201165	0.215302	0.226299	0.2304	0.262141	0.211668	0.250501	0.199123	0.279958	0.248049	0.231138	0.242842	0.227585	0.225269
72.3269	-38.1233	0.265752	0.240581	0.232798	0.305276	0.201169	0.215306	0.226304	0.230406	0.262147	0.216415	0.246339	0.20109	0.279965	0.251768	0.22868	0.242846	0.226022	0.229662
72.3232	-38.1306	0.265756	0.240582	0.244594	0.285114	0.201173	0.215311	0.226309	0.230411	0.262153	0.230665	0.233839	0.206975	0.284896	0.253723	0.227514	0.240449	0.226025	0.234068
72.3207	-38.1354	0.265759	0.240582	0.256412	0.264914	0.201176	0.220153	0.219905	0.230416	0.262159	0.235424	0.229675	0.208938	0.289832	0.25196	0.228812	0.238052	0.226028	0.237007
72.3169	-38.1426	0.265763	0.240583	0.26233	0.254803	0.20118	0.234693	0.200652	0.238151	0.256398	0.240181	0.227634	0.208943	0.292304	0.255728	0.230172	0.233252	0.229161	0.24144
72.3143	-38.1475	0.265767	0.240584	0.262334	0.254807	0.201184	0.244399	0.187802	0.253632	0.250735	0.245038	0.227791	0.205031	0.29231	0.257593	0.232734	0.230875	0.232312	0.242951
72.3105	-38.1547	0.26577	0.240584	0.262338	0.254811	0.204596	0.254247	0.175018	0.261508	0.256835	0.240566	0.234327	0.195227	0.292317	0.257598	0.23653	0.230944	0.237063	0.244501
72.308	-38.1596	0.265774	0.240585	0.262342	0.254816	0.211423	0.249651	0.181628	0.246245	0.262734	0.2359	0.242847	0.191408	0.287524	0.257604	0.237799	0.23097	0.241783	0.244555
72.3042	-38.1669	0.265778	0.240586	0.262346	0.25482	0.218261	0.240176	0.194701	0.23096	0.26274	0.235905	0.251381	0.189599	0.280323	0.257609	0.237803	0.234646	0.243404	0.243139
72.3016	-38.1717	0.265782	0.240587	0.26235	0.254824	0.218266	0.235317	0.201151	0.230966	0.262747	0.235911	0.249254	0.191572	0.280329	0.257614	0.236543	0.238301	0.241873	0.241684
72.2978	-38.179	0.265785	0.240587	0.244624	0.285153	0.208022	0.234966	0.220463	0.230971	0.262753	0.235917	0.238605	0.201409	0.280335	0.25204	0.236452	0.24191	0.240308	0.238734
72.2952	-38.1839	0.265789	0.240588	0.232833	0.305328	0.201207	0.23958	0.226894	0.230976	0.262759	0.235922	0.232228	0.207302	0.280341	0.248328	0.237656	0.244339	0.235626	0.238712
72.2913	-38.1911	0.265793	0.240589	0.232837	0.305333	0.201211	0.249289	0.214041	0.230982	0.262765	0.235928	0.238617	0.201418	0.280348	0.248333	0.240188	0.245614	0.227841	0.244566
72.2875	-38.1983	0.265796	0.240589	0.23284	0.305339	0.211448	0.249683	0.194723	0.230987	0.280456	0.221912	0.25141	0.193662	0.275547	0.252055	0.242785	0.24326	0.227875	0.249004
72.2849	-38.2031	0.2658	0.24059	0.232844	0.305344	0.218287	0.240207	0.194728	0.230992	0.292271	0.212555	0.257817	0.191801	0.270742	0.25578	0.242854	0.243309	0.229477	0.250516
72.281	-38.2104	0.265804	0.240591	0.250548	0.295623	0.211699	0.240212	0.194732	0.230998	0.292277	0.203035	0.266194	0.189885	0.273274	0.259598	0.240457	0.247036	0.229558	0.252054
72.2784	-38.2152	0.265808	0.240591	0.262378	0.295983	0.2051	0.240217	0.194736	0.231003	0.292284	0.193525	0.270295	0.18989	0.278215	0.259695	0.239259	0.248289	0.23116	0.250625
72.2745	-38.2226	0.265811	0.240592	0.262382	0.306293	0.201798	0.240222	0.194741	0.231008	0.292291	0.193529	0.266031	0.193837	0.280691	0.257884	0.24306	0.244683	0.2343	0.249182
72.2719	-38.2275	0.265815	0.240593	0.262386	0.306298	0.201802	0.240227	0.194745	0.231014	0.292298	0.203049	0.257675	0.19778	0.280697	0.257889	0.24433	0.243482	0.234302	0.249184
72.268	-38.2348	0.265819	0.244672	0.256647	0.306303	0.201805	0.240232	0.19475	0.231019	0.292305	0.21258	0.251448	0.201775	0.278297	0.257894	0.244334	0.243486	0.234305	0.249187
72.2654	-38.2398	0.265822	0.252844	0.245148	0.306309	0.201809	0.240237	0.194754	0.231024	0.292312	0.217348	0.249404	0.205825	0.273487	0.257899	0.24687	0.241082	0.234308	0.249189
72.2615	-38.2472	0.265826	0.261034	0.233626	0.306314	0.201813	0.240243	0.194758	0.23103	0.292319	0.231656	0.243252	0.209879	0.268674	0.257905	0.251939	0.236268	0.23431	0.249191
72.2589	-38.2521	0.26583	0.261035	0.23363	0.306319	0.201817	0.240248	0.194763	0.24654	0.280757	0.236435	0.241203	0.209884	0.26868	0.25791	0.254476	0.233862	0.234313	0.249194
72.255	-38.2595	0.265834	0.261036	0.233634	0.306325	0.201821	0.230525	0.207656	0.269842	0.26338	0.231667	0.243263	0.209889	0.268686	0.257915	0.251947	0.236275	0.234316	0.249196
72.2524	-38.2644	0.265837	0.261037	0.233637	0.30633	0.201825	0.220816	0.233608	0.254549	0.263386	0.222134	0.247376	0.207869	0.271102	0.25792	0.24562	0.2423	0.234319	0.247727
72.2485	-38.2718	0.265841	0.261038	0.233641	0.306335	0.201829	0.215968	0.25969	0.231566	0.263393	0.212611	0.251484	0.201803	0.278334	0.257925	0.236765	0.250726	0.229615	0.247691
72.2446	-38.2792	0.265845	0.261039	0.233644	0.306341	0.201833	0.215973	0.259695	0.231571	0.263399	0.217379	0.249439	0.199786	0.280746	0.257931	0.232974	0.254337	0.226481	0.249139
72.242	-38.2841	0.265848	0.261039	0.233648	0.306346	0.201837	0.215977	0.259701	0.231576	0.263405	0.226919	0.245341	0.19979	0.280753	0.259797	0.235539	0.250733	0.226484	0.249141
72.2381	-38.2915	0.265852	0.26104	0.233651	0.306351	0.201841	0.215982	0.259707	0.231582	0.263411	0.236469	0.245505	0.197879	0.278352	0.265391	0.2407	0.24354	0.226502	0.252098
72.2355	-38.2964	0.265856	0.261041	0.23957	0.296241	0.201845	0.225695	0.246851	0.231587	0.263418	0.236475	0.249782	0.197989	0.273542	0.26726	0.245802	0.239975	0.226535	0.253597
72.2316	-38.3038	0.275683	0.24874	0.257349	0.265845	0.201848	0.240289	0.227527	0.231592	0.263424	0.23648	0.254062	0.1981	0.268727	0.272855	0.248437	0.237633	0.228152	0.25218
72.2289	-38.3087	0.282281	0.240539	0.263289	0.255698	0.208692	0.230806	0.214427	0.246932	0.275245	0.227119	0.258343	0.194159	0.273672	0.272958	0.247238	0.238885	0.229755	0.252221
72.225	-38.3161	0.282285	0.24054	0.257357	0.265855	0.218976	0.21655	0.194806	0.269898	0.293	0.203504	0.266737	0.190214	0.281093	0.267509	0.245974	0.242549	0.232927	0.252274
72.2224	-38.321	0.282289	0.240541	0.245505	0.286137	0.21898	0.216554	0.194811	0.269904	0.293007	0.203509	0.266744	0.190218	0.281099	0.267514	0.244711	0.246212	0.234531	0.250842
72.2185	-38.3283	0.282293	0.240542	0.233673	0.306383	0.218984	0.216559	0.194815	0.269911	0.293014	0.213061	0.262641	0.190222	0.281105	0.26752	0.240913	0.253513	0.23458	0.24941
72.2158	-38.3334	0.282297	0.240542	0.233676	0.306388	0.218988	0.216564	0.19482	0.269917	0.293021	0.222614	0.258538	0.190227	0.281111	0.267525	0.235849	0.258334	0.236152	0.247953
72.2118	-38.3409	0.282301	0.240543	0.245516	0.286152	0.218993	0.216568	0.201362	0.262274	0.293028	0.236962	0.245951	0.196155	0.283589	0.265712	0.232054	0.261948	0.240866	0.243575
72.2092	-38.3458	0.282305	0.240544	0.257377	0.265878	0.215567	0.221331	0.214456	0.246966	0.293035	0.232184	0.243742	0.204155	0.28372	0.262079	0.232058	0.261952	0.24244	0.242117
72.2052	-38.3532	0.282309	0.240545	0.257381	0.265882	0.205299	0.235587	0.227568	0.231635	0.293042	0.217854	0.249919	0.210242	0.281437	0.258443	0.233328	0.260752	0.242442	0.24212
72.2013	-38.3607	0.282314	0.240546	0.239606	0.296293	0.201884	0.240335	0.227573	0.247186	0.28145	0.21786	0.249925	0.210247	0.281443	0.258448	0.238399	0.25594	0.242445	0.246538
72.1986	-38.3656	0.282318	0.240546	0.23961	0.296298	0.201888	0.250074	0.214681	0.262757	0.269842	0.227419	0.245818	0.210252	0.283924	0.260364	0.241	0.25358	0.239338	0.252431
72.1946	-38.3731	0.282322	0.240547	0.257393	0.265896	0.205311	0.26484	0.188842	0.270553	0.264036	0.23699	0.248119	0.204339	0.291357	0.260504	0.246169	0.24883	0.234675	0.259796
72.192	-38.3781	0.282326	0.240548	0.263334	0.255747	0.212161	0.265113	0.175908	0.270559	0.264042	0.236996	0.252406	0.204449	0.289014	0.258686	0.251248	0.246465	0.233137	0.261284
72.188	-38.3855	0.28233	0.240549	0.263338	0.276369	0.212408	0.265385	0.162954	0.270566	0.264048	0.237002	0.254552	0.208569	0.284249	0.26247	0.252618	0.245327	0.233184	0.262798
72.1853	-38.3905	0.282334	0.24055	0.263342	0.297027	0.205786	0.265391	0.162958	0.270572	0.264054	0.246574	0.254723	0.204622	0.289211	0.262566	0.253956	0.241708	0.234758	0.264286
72.1813	-38.398	0.282338	0.240551	0.263346	0.307372	0.202472	0.255617	0.17592	0.270578	0.26998	0.251465	0.254893	0.20067	0.294177	0.258922	0.25777	0.238087	0.237904	0.264314
72.1786	-38.4031	0.282342	0.240551	0.275224	0.287069	0.202476	0.245857	0.188864	0.270585	0.281836	0.232498	0.259022	0.200675	0.294183	0.260795	0.256537	0.23809	0.241049	0.264342
72.1746	-38.4106	0.282346	0.240552	0.29308	0.256542	0.20248	0.240985	0.195331	0.270591	0.293706	0.213529	0.26529	0.200732	0.296733	0.262759	0.252826	0.241781	0.239527	0.262897
72.1719	-38.4156	0.28235	0.240553	0.293085	0.256547	0.202484	0.24099	0.195335	0.270597	0.293713	0.218317	0.267526	0.200841	0.296866	0.260983	0.251591	0.245473	0.238003	0.26145
72.1679	-38.4231	0.282355	0.240554	0.293089	0.256551	0.202488	0.240995	0.19534	0.270603	0.29372	0.232686	0.265643	0.20095	0.294516	0.259161	0.251596	0.250395	0.234922	0.262951
72.1652	-38.4282	0.282359	0.248729	0.281559	0.256556	0.202492	0.241	0.195344	0.27061	0.293727	0.237486	0.263586	0.200955	0.294523	0.259166	0.2516	0.254088	0.233396	0.261505
72.1611	-38.4357	0.282363	0.261025	0.252311	0.276926	0.212791	0.226724	0.195349	0.270616	0.293734	0.237491	0.263593	0.200959	0.294529	0.261041	0.254177	0.256619	0.230326	0.26007
72.1571	-38.4433	0.282367	0.252825	0.246063	0.30741	0.219671	0.217189	0.195353	0.294003	0.276295	0.237497	0.263599	0.200964	0.294535	0.266658	0.253005	0.256666	0.227211	0.264495
72.1544	-38.4483	0.282371	0.244642	0.257613	0.307415	0.219676	0.222072	0.188893	0.309623	0.264651	0.237503	0.263605	0.200969	0.294542	0.268535	0.254311	0.254253	0.227214	0.267446
72.1503	-38.4559	0.282375	0.240558	0.263383	0.307421	0.21968	0.236734	0.169477	0.30963	0.264657	0.237508	0.263612	0.200973	0.294548	0.270411	0.25689	0.250628	0.231935	0.267486
72.1476	-38.461	0.282379	0.240559	0.263387	0.307426	0.219684	0.241632	0.162998	0.309637	0.264663	0.237514	0.263618	0.200978	0.294555	0.27416	0.254414	0.250632	0.235084	0.267513
72.1435	-38.4686	0.282383	0.24056	0.263391	0.297089	0.223007	0.241637	0.163002	0.309644	0.264669	0.23752	0.263624	0.200983	0.294561	0.27791	0.251937	0.250635	0.235087	0.27194
72.1408	-38.4737	0.282387	0.240561	0.263395	0.276436	0.229639	0.241642	0.169562	0.317598	0.258955	0.232822	0.26363	0.200987	0.294567	0.277915	0.251941	0.250638	0.236662	0.27048
72.1368	-38.4813	0.282391	0.240561	0.269335	0.245666	0.236259	0.241647	0.189261	0.318028	0.259271	0.218699	0.267931	0.197028	0.299539	0.274268	0.248129	0.25427	0.241385	0.266095
72.134	-38.4863	0.282396	0.240562	0.281226	0.245963	0.229647	0.241653	0.19584	0.310344	0.265225	0.218781	0.270172	0.193065	0.304513	0.270619	0.245591	0.25669	0.244535	0.263172
72.13	-38.4939	0.2824	0.240563	0.293139	0.266939	0.216389	0.241658	0.202416	0.302663	0.265231	0.233181	0.266134	0.195153	0.30465	0.266967	0.245595	0.256694	0.250833	0.257322
72.1272	-38.499	0.282404	0.240564	0.293144	0.287647	0.209751	0.241663	0.215576	0.287279	0.265237	0.23799	0.264073	0.199228	0.304784	0.263315	0.245599	0.257928	0.253999	0.254409
72.1232	-38.5066	0.282408	0.240565	0.293148	0.30839	0.203102	0.241668	0.228755	0.271872	0.265243	0.237995	0.26838	0.201373	0.302495	0.259659	0.249418	0.259229	0.250916	0.257385
72.1205	-38.5116	0.282412	0.240566	0.293153	0.287657	0.20976	0.241673	0.228761	0.271878	0.26525	0.238001	0.272691	0.20148	0.297652	0.257791	0.254479	0.259299	0.24624	0.261814
72.1164	-38.5192	0.282416	0.240566	0.293158	0.25662	0.219723	0.241679	0.228766	0.271884	0.265256	0.238007	0.272697	0.203524	0.295232	0.252178	0.262021	0.258137	0.243123	0.264767
72.1124	-38.5267	0.28242	0.240567	0.293162	0.24628	0.223046	0.241684	0.228771	0.271891	0.265262	0.238012	0.266248	0.209487	0.287776	0.255802	0.264537	0.254466	0.241522	0.263258
72.1097	-38.5317	0.282424	0.240568	0.293167	0.246284	0.22305	0.241689	0.228776	0.271897	0.265269	0.238018	0.264105	0.207399	0.287664	0.259465	0.263269	0.253217	0.238347	0.263212
72.1056	-38.5391	0.282428	0.240569	0.293171	0.256633	0.219736	0.241694	0.215606	0.287319	0.265275	0.238024	0.25981	0.205262	0.294942	0.25947	0.259457	0.251924	0.235144	0.264617
72.1029	-38.5441	0.282433	0.24057	0.293176	0.266977	0.216423	0.241699	0.202452	0.30272	0.265281	0.23803	0.255519	0.209233	0.294949	0.259475	0.25819	0.250675	0.235117	0.264594
72.0989	-38.5515	0.282437	0.24057	0.299135	0.287869	0.206459	0.241705	0.195884	0.310416	0.277183	0.228604	0.253377	0.211219	0.294955	0.265096	0.255745	0.251931	0.232002	0.267546
72.0963	-38.5564	0.282441	0.240571	0.311066	0.277851	0.206573	0.236939	0.202461	0.302734	0.289098	0.228774	0.251395	0.213316	0.295085	0.267063	0.25457	0.253209	0.232047	0.270536
72.0922	-38.5638	0.282445	0.240572	0.323018	0.267792	0.213584	0.237295	0.202752	0.27964	0.295065	0.238485	0.253787	0.21354	0.297826	0.263539	0.257213	0.254551	0.236857	0.272126
72.0896	-38.5687	0.282449	0.240573	0.323023	0.288565	0.210376	0.242322	0.209531	0.256515	0.295072	0.23849	0.260249	0.211667	0.297957	0.265505	0.258584	0.255872	0.240081	0.269262
72.0856	-38.5761	0.282453	0.24875	0.31149	0.309373	0.203705	0.242328	0.22934	0.23335	0.295079	0.238496	0.271026	0.205814	0.303067	0.263807	0.258682	0.259638	0.244897	0.264942
72.0829	-38.581	0.282457	0.256945	0.299934	0.309378	0.203709	0.252144	0.216345	0.249012	0.283404	0.238502	0.275346	0.201837	0.308058	0.260144	0.258686	0.262107	0.244929	0.266444
72.0789	-38.5883	0.282461	0.26105	0.29415	0.309384	0.203714	0.266893	0.216637	0.24935	0.265858	0.238508	0.275352	0.201842	0.308065	0.260149	0.25869	0.263343	0.241794	0.272342
72.0763	-38.5931	0.282465	0.261051	0.294155	0.309389	0.203718	0.266899	0.223258	0.241615	0.265864	0.238513	0.275359	0.201846	0.308072	0.26203	0.257452	0.263347	0.238644	0.27675
72.0723	-38.6004	0.282469	0.252849	0.287817	0.340036	0.203722	0.266904	0.203427	0.264829	0.265871	0.238519	0.275365	0.201851	0.300601	0.273167	0.253725	0.26335	0.235496	0.279681
72.0684	-38.6077	0.282474	0.240578	0.293222	0.360423	0.203726	0.26691	0.196828	0.272561	0.265877	0.238525	0.275372	0.201856	0.295627	0.278715	0.252485	0.263354	0.237074	0.278219
72.0658	-38.6125	0.282478	0.240579	0.305143	0.340048	0.20373	0.261998	0.20335	0.272567	0.265883	0.238531	0.275378	0.20186	0.295633	0.27872	0.252489	0.263357	0.240228	0.275293
72.0618	-38.6197	0.282482	0.24058	0.329038	0.299194	0.203734	0.247269	0.222878	0.272573	0.26589	0.238536	0.275385	0.201865	0.295639	0.278725	0.253767	0.263382	0.244973	0.269435
72.0591	-38.6247	0.282486	0.24058	0.341007	0.257929	0.210413	0.24237	0.229381	0.27258	0.265896	0.238542	0.275392	0.201869	0.295646	0.282485	0.253832	0.263429	0.245004	0.267984
72.0552	-38.6319	0.28249	0.240581	0.37099	0.175511	0.220409	0.242375	0.229387	0.272586	0.265902	0.238548	0.275398	0.201874	0.295652	0.288126	0.252651	0.264709	0.246626	0.266556
72.0526	-38.6367	0.282494	0.240582	0.383017	0.15495	0.220414	0.247285	0.222893	0.272593	0.265909	0.243366	0.273334	0.201879	0.298149	0.286299	0.25393	0.265968	0.246658	0.265104
72.0488	-38.6439	0.282498	0.244669	0.377257	0.154953	0.223867	0.257242	0.223199	0.249402	0.265915	0.257824	0.26712	0.205967	0.300771	0.280806	0.257759	0.264802	0.243535	0.266583
72.0462	-38.6486	0.282502	0.252856	0.365712	0.154956	0.230777	0.252585	0.229926	0.233917	0.277844	0.2532	0.26505	0.210059	0.298408	0.278977	0.259039	0.266061	0.240411	0.26954
72.0423	-38.6558	0.282506	0.261062	0.354145	0.154959	0.237699	0.242995	0.229932	0.233923	0.29576	0.239006	0.265057	0.212109	0.303462	0.273479	0.259043	0.269768	0.235724	0.272497
72.0397	-38.6605	0.28251	0.261063	0.354151	0.154961	0.237703	0.243	0.229937	0.233928	0.295767	0.243832	0.262988	0.212113	0.308459	0.269812	0.259048	0.269771	0.235726	0.275454
72.0358	-38.6676	0.282515	0.261064	0.354156	0.154964	0.237708	0.243006	0.229942	0.233934	0.295774	0.258317	0.256761	0.212118	0.308466	0.275455	0.255316	0.269774	0.235728	0.27989
72.0332	-38.6723	0.282519	0.261065	0.354162	0.154967	0.237713	0.243011	0.229947	0.233939	0.295782	0.263155	0.254688	0.212123	0.308472	0.279221	0.252828	0.269778	0.235731	0.279892
72.0294	-38.6794	0.282523	0.261066	0.354168	0.15497	0.237718	0.243016	0.229953	0.233945	0.295789	0.263161	0.254694	0.212128	0.308479	0.279226	0.252832	0.269781	0.235733	0.279895
72.0255	-38.6865	0.282527	0.261067	0.354174	0.154973	0.237722	0.243021	0.229958	0.249646	0.284084	0.263167	0.2547	0.212133	0.308485	0.279231	0.252836	0.269785	0.235736	0.279897
72.0229	-38.6913	0.282531	0.261068	0.354179	0.154975	0.237727	0.243027	0.229963	0.265368	0.272364	0.263173	0.256863	0.210147	0.308492	0.279237	0.25284	0.269788	0.235738	0.279899
72.019	-38.6984	0.282535	0.261069	0.354185	0.154978	0.237732	0.243032	0.236588	0.265495	0.266501	0.26318	0.263348	0.204173	0.308498	0.279242	0.252844	0.269792	0.235741	0.279902
72.0164	-38.7032	0.282539	0.26107	0.354191	0.154981	0.237737	0.243037	0.249848	0.249994	0.266507	0.263186	0.265515	0.202182	0.308505	0.279247	0.254124	0.268583	0.238897	0.279928
72.0125	-38.7103	0.282543	0.261071	0.354196	0.154984	0.237741	0.243043	0.263125	0.234471	0.266514	0.263192	0.265522	0.202187	0.308511	0.279253	0.257956	0.264947	0.243632	0.281444
72.0099	-38.7151	0.282547	0.261072	0.354202	0.154987	0.237746	0.243048	0.263131	0.234476	0.26652	0.263199	0.265528	0.202192	0.308518	0.279258	0.260513	0.263758	0.242071	0.284402
72.006	-38.7223	0.282551	0.261073	0.354208	0.15499	0.237751	0.243053	0.263137	0.234482	0.272499	0.25847	0.265534	0.202196	0.308525	0.284905	0.261884	0.26261	0.240537	0.287386
72.0033	-38.7271	0.282556	0.261074	0.354214	0.154992	0.237755	0.243059	0.24987	0.250017	0.284461	0.248997	0.265541	0.206291	0.303665	0.288674	0.264503	0.261462	0.239003	0.288891
71.9994	-38.7344	0.28256	0.261075	0.354219	0.154995	0.230842	0.262502	0.216962	0.273279	0.296438	0.239512	0.265547	0.212436	0.29886	0.286844	0.272173	0.259116	0.239059	0.29042
71.9968	-38.7392	0.282564	0.261076	0.354225	0.154998	0.223938	0.281945	0.20391	0.273285	0.308416	0.234857	0.265635	0.212494	0.301424	0.286939	0.273518	0.257944	0.242245	0.288992
71.9928	-38.7464	0.282568	0.261077	0.354231	0.155001	0.230851	0.277299	0.19738	0.273291	0.326407	0.235111	0.265884	0.212656	0.304111	0.285242	0.276172	0.258047	0.242315	0.289053
71.9902	-38.7513	0.282572	0.261078	0.354236	0.16538	0.234446	0.267707	0.210632	0.257798	0.338408	0.230448	0.268135	0.212765	0.304239	0.285336	0.276239	0.260563	0.240791	0.287612
71.9862	-38.7585	0.282576	0.261079	0.354242	0.196567	0.227906	0.262914	0.230542	0.234515	0.356433	0.216166	0.274638	0.212926	0.304427	0.289244	0.270002	0.264277	0.242413	0.281743
71.9823	-38.7658	0.28258	0.26108	0.354248	0.206983	0.234964	0.238638	0.243614	0.23452	0.356441	0.216171	0.276812	0.212983	0.309499	0.289383	0.263699	0.266713	0.243995	0.280277
71.9796	-38.7706	0.282584	0.261081	0.354254	0.206987	0.238439	0.22398	0.256668	0.234526	0.368466	0.206647	0.276818	0.212988	0.309506	0.289388	0.258586	0.270344	0.245564	0.280279
71.9756	-38.7778	0.282588	0.261082	0.354259	0.20699	0.234974	0.223881	0.263191	0.234531	0.386524	0.192337	0.270325	0.212837	0.314333	0.291235	0.250919	0.27393	0.247105	0.278779
71.973	-38.7827	0.282592	0.261083	0.360278	0.196709	0.228046	0.233503	0.263197	0.234537	0.386533	0.192341	0.266003	0.212737	0.314213	0.29115	0.250867	0.272655	0.248646	0.2758
71.969	-38.7899	0.282597	0.261084	0.378354	0.165801	0.221129	0.243112	0.263203	0.234542	0.380522	0.197121	0.266009	0.212742	0.309218	0.283528	0.259644	0.267735	0.251765	0.272833
71.9663	-38.7947	0.282601	0.269298	0.372812	0.155482	0.221133	0.243117	0.263209	0.234548	0.368501	0.206667	0.268179	0.210749	0.309225	0.279766	0.265979	0.264093	0.251768	0.272835
71.9623	-38.8019	0.282605	0.281652	0.355403	0.155485	0.221137	0.243122	0.263215	0.234553	0.356492	0.216203	0.274683	0.210908	0.301912	0.287306	0.268661	0.259273	0.253378	0.272871
71.9597	-38.8067	0.282609	0.281654	0.355409	0.155487	0.221142	0.243127	0.263221	0.250295	0.338751	0.220974	0.276857	0.213017	0.29203	0.298531	0.267507	0.258099	0.253408	0.275854
71.9557	-38.8139	0.282613	0.277533	0.361226	0.15549	0.221146	0.243133	0.263227	0.273942	0.303109	0.235261	0.276864	0.210969	0.28698	0.307822	0.262453	0.261773	0.250265	0.281763
71.953	-38.8187	0.282617	0.269302	0.372837	0.17632	0.214469	0.243138	0.263233	0.273949	0.297119	0.240022	0.274703	0.208871	0.29187	0.302171	0.261091	0.264168	0.248661	0.28321
71.949	-38.826	0.282621	0.248787	0.401782	0.20763	0.20443	0.243143	0.263239	0.273955	0.297126	0.240028	0.268211	0.210773	0.296756	0.290872	0.260917	0.267756	0.245464	0.281676
71.9464	-38.8308	0.282625	0.240608	0.413332	0.207634	0.204434	0.243149	0.263245	0.273961	0.30313	0.235278	0.266053	0.212776	0.296763	0.288994	0.259614	0.270189	0.243888	0.281666
71.9424	-38.838	0.282629	0.244697	0.40757	0.218077	0.201088	0.252998	0.250209	0.28185	0.315269	0.221	0.266059	0.223034	0.282065	0.294605	0.264789	0.265374	0.250233	0.281738
71.9384	-38.8453	0.282633	0.256988	0.390236	0.249453	0.191027	0.267794	0.250544	0.282218	0.303622	0.225924	0.270559	0.23559	0.25761	0.307803	0.273959	0.259475	0.25352	0.284824
71.9357	-38.8501	0.282638	0.265199	0.378661	0.259933	0.180748	0.287268	0.257436	0.266773	0.297733	0.245321	0.273062	0.233823	0.257813	0.309887	0.279239	0.257178	0.255198	0.287878
71.9317	-38.8574	0.282642	0.277541	0.361267	0.259938	0.170387	0.316473	0.257782	0.243396	0.29774	0.264755	0.275566	0.225866	0.275394	0.308383	0.282021	0.259829	0.260094	0.288036
71.9291	-38.8622	0.282646	0.285786	0.349653	0.259943	0.17039	0.31648	0.264459	0.235597	0.297747	0.264761	0.277747	0.223865	0.287929	0.308622	0.27833	0.266065	0.258609	0.289586
71.9251	-38.8695	0.28265	0.298179	0.332199	0.249472	0.173755	0.3066	0.277566	0.235602	0.297754	0.264767	0.277753	0.230049	0.290614	0.308813	0.270758	0.273464	0.258664	0.289632
71.9224	-38.8743	0.282654	0.30232	0.326373	0.228551	0.183925	0.291946	0.283985	0.243413	0.297761	0.264774	0.27776	0.234176	0.285712	0.308819	0.265633	0.275866	0.263388	0.285199
71.9184	-38.8816	0.289277	0.281685	0.343856	0.207665	0.201004	0.272633	0.27054	0.266805	0.297768	0.255063	0.281948	0.234182	0.2807	0.310623	0.256638	0.278183	0.268056	0.282206
71.9157	-38.8865	0.295937	0.265228	0.355485	0.186785	0.214632	0.263034	0.263893	0.274596	0.297775	0.245361	0.286132	0.232125	0.278145	0.310535	0.254025	0.278103	0.268003	0.282165
71.9117	-38.8938	0.299282	0.261118	0.355491	0.155527	0.235063	0.248614	0.263899	0.258799	0.309573	0.25022	0.284051	0.225949	0.280496	0.306668	0.261602	0.271957	0.263218	0.285065
71.909	-38.8986	0.299287	0.261119	0.355497	0.15553	0.238539	0.243803	0.263905	0.243022	0.321357	0.259939	0.279878	0.221836	0.280393	0.306581	0.270516	0.268346	0.253758	0.290948
71.9049	-38.906	0.299291	0.26112	0.355502	0.155533	0.238544	0.243809	0.263911	0.235143	0.327247	0.255087	0.281975	0.215665	0.28274	0.308382	0.276898	0.26719	0.241148	0.298299
71.9022	-38.911	0.299296	0.261122	0.355508	0.155536	0.238549	0.243814	0.263917	0.235148	0.327255	0.245385	0.286159	0.213613	0.285195	0.308388	0.274338	0.267154	0.241126	0.299759
71.8982	-38.9183	0.2993	0.261123	0.355514	0.155539	0.238553	0.243819	0.263923	0.235154	0.339286	0.24071	0.27973	0.217631	0.285201	0.31217	0.265433	0.269534	0.250576	0.286467
71.8941	-38.9256	0.299305	0.261124	0.35552	0.186805	0.225057	0.263451	0.244307	0.250935	0.345587	0.245828	0.273547	0.221803	0.282868	0.319831	0.25792	0.272014	0.260094	0.274709
71.8914	-38.9305	0.299309	0.261125	0.355526	0.218138	0.208075	0.29286	0.231414	0.251158	0.33381	0.255559	0.273715	0.226034	0.280585	0.321873	0.256753	0.274555	0.263329	0.276265
71.8874	-38.9378	0.299314	0.269351	0.343907	0.249523	0.191085	0.317336	0.238397	0.25158	0.310223	0.265301	0.278234	0.232441	0.275949	0.322119	0.263306	0.278478	0.261924	0.285284
71.8847	-38.9427	0.299318	0.277595	0.332265	0.260005	0.187727	0.317343	0.251755	0.267642	0.286594	0.270174	0.28268	0.234675	0.273653	0.320374	0.271066	0.278642	0.260448	0.29129
71.8807	-38.95	0.299323	0.281724	0.344556	0.22902	0.187731	0.31735	0.26513	0.299618	0.251072	0.284797	0.280755	0.234789	0.273763	0.316688	0.280058	0.277543	0.260528	0.294322
71.878	-38.9548	0.299327	0.281725	0.356666	0.197839	0.191096	0.312399	0.265019	0.331299	0.227254	0.294457	0.274303	0.234685	0.276176	0.314754	0.282571	0.277546	0.26053	0.291358
71.8739	-38.9621	0.299332	0.281727	0.356672	0.166459	0.201169	0.297552	0.264674	0.378623	0.191382	0.308778	0.256892	0.240439	0.280939	0.312728	0.279889	0.277432	0.262039	0.288342
71.8712	-38.9669	0.299336	0.273476	0.368337	0.156019	0.207986	0.287811	0.264562	0.378471	0.191317	0.308674	0.245959	0.248347	0.283347	0.308904	0.275955	0.277316	0.263546	0.291257
71.8671	-38.9742	0.299341	0.252915	0.397409	0.156021	0.218392	0.273389	0.264568	0.330764	0.226934	0.294065	0.243578	0.254296	0.285807	0.301346	0.273277	0.277198	0.261885	0.294148
71.8644	-38.979	0.299346	0.244715	0.409013	0.156024	0.22534	0.273657	0.251464	0.291091	0.256552	0.289205	0.252188	0.250361	0.283358	0.299462	0.274534	0.277202	0.258722	0.291164
71.8604	-38.9863	0.29935	0.244716	0.40902	0.156027	0.235773	0.274063	0.245116	0.227996	0.291992	0.289211	0.27393	0.238567	0.276048	0.303294	0.278474	0.274846	0.258777	0.285281
71.8577	-38.9911	0.299355	0.257019	0.39163	0.176928	0.239517	0.269498	0.245344	0.204461	0.297895	0.289218	0.284828	0.234717	0.273699	0.307173	0.281164	0.273727	0.258845	0.285335
71.8536	-38.9984	0.299359	0.277607	0.362541	0.208345	0.239907	0.269891	0.232293	0.220366	0.2802	0.298963	0.285003	0.241031	0.268937	0.312994	0.281347	0.275087	0.258937	0.291341
71.8495	-39.0056	0.299364	0.281737	0.356714	0.208349	0.239912	0.269897	0.232298	0.236214	0.280415	0.30406	0.278715	0.245173	0.271556	0.311244	0.278841	0.278813	0.260562	0.294352
71.8468	-39.0104	0.299368	0.277609	0.362553	0.208353	0.236427	0.264807	0.238784	0.244045	0.292465	0.294521	0.274361	0.247133	0.27654	0.309401	0.276276	0.280018	0.258968	0.297299
71.8428	-39.0175	0.302712	0.261154	0.380024	0.208357	0.222491	0.269269	0.238468	0.267499	0.298499	0.279996	0.272031	0.244898	0.278851	0.309271	0.277478	0.27626	0.255739	0.300192
71.8401	-39.0223	0.309421	0.240651	0.397462	0.208361	0.212062	0.273833	0.244942	0.275311	0.298506	0.270258	0.276232	0.238707	0.281211	0.309185	0.279991	0.271301	0.25569	0.298668
71.836	-39.0295	0.316166	0.220211	0.414858	0.208365	0.205121	0.268625	0.264623	0.275317	0.298513	0.265396	0.278334	0.234583	0.288645	0.309237	0.278741	0.266344	0.258808	0.295683
71.8333	-39.0343	0.316171	0.220212	0.414864	0.208369	0.208597	0.263815	0.264629	0.283244	0.29261	0.265402	0.27834	0.234589	0.296189	0.307486	0.278804	0.262664	0.263547	0.294224
71.8293	-39.0416	0.316176	0.228381	0.403283	0.208372	0.219032	0.254297	0.271429	0.291424	0.274865	0.280023	0.278592	0.232693	0.303855	0.309609	0.277698	0.261519	0.271521	0.288391
71.8266	-39.0465	0.316181	0.236569	0.39168	0.208376	0.222518	0.259376	0.271679	0.283733	0.268946	0.294661	0.281023	0.232913	0.301573	0.313542	0.27656	0.262837	0.277928	0.284037
71.8226	-39.0538	0.316186	0.24067	0.385872	0.20838	0.232972	0.259761	0.258664	0.275913	0.268953	0.309313	0.285642	0.235258	0.294357	0.321271	0.278048	0.26671	0.284422	0.281221
71.8199	-39.0587	0.316191	0.240671	0.385879	0.208384	0.239956	0.260011	0.245517	0.275919	0.268959	0.314207	0.287915	0.239511	0.289541	0.323269	0.279423	0.272997	0.281375	0.284259
71.8159	-39.066	0.316196	0.240672	0.385885	0.208388	0.239961	0.269957	0.232351	0.275926	0.268965	0.309328	0.292212	0.24579	0.287236	0.317715	0.280714	0.282959	0.268805	0.296146
71.8132	-39.0709	0.316201	0.240673	0.385891	0.208392	0.232986	0.279646	0.232357	0.275932	0.268972	0.309335	0.290032	0.24574	0.289711	0.312025	0.280633	0.289118	0.257729	0.30352
71.8092	-39.0781	0.316206	0.240675	0.385898	0.218873	0.21918	0.294148	0.232362	0.275939	0.268978	0.324002	0.277174	0.243505	0.294544	0.304354	0.27918	0.292709	0.249755	0.303427
71.8052	-39.0853	0.316211	0.240676	0.385904	0.250362	0.209083	0.294155	0.232367	0.299773	0.269292	0.339034	0.262356	0.237245	0.296851	0.302332	0.27907	0.28518	0.254393	0.298904
71.8025	-39.0901	0.316216	0.240677	0.38591	0.271387	0.202344	0.294161	0.23906	0.307865	0.27554	0.329586	0.264621	0.233219	0.299375	0.300486	0.281644	0.276532	0.260672	0.297412
71.7985	-39.0972	0.31622	0.240678	0.385917	0.313494	0.188839	0.294168	0.259155	0.284369	0.293678	0.300527	0.284073	0.23147	0.297137	0.302561	0.286936	0.269254	0.270223	0.291573
71.7958	-39.1019	0.316225	0.240679	0.385923	0.345151	0.178688	0.294174	0.272567	0.268689	0.299735	0.290844	0.294942	0.233759	0.292369	0.306491	0.28966	0.269385	0.275074	0.288707
71.7918	-39.109	0.31623	0.24068	0.385929	0.366293	0.171909	0.294181	0.292705	0.24514	0.299742	0.29085	0.301522	0.235998	0.287539	0.31608	0.291155	0.276991	0.276844	0.288855
71.7892	-39.1137	0.316235	0.240681	0.385936	0.334596	0.182086	0.304131	0.286255	0.237283	0.293699	0.295654	0.301529	0.236003	0.287545	0.319886	0.292505	0.282024	0.276935	0.291894
71.7852	-39.1207	0.31624	0.240682	0.385942	0.271412	0.202364	0.319078	0.266463	0.237289	0.275572	0.310036	0.294963	0.242076	0.28755	0.319891	0.293798	0.283289	0.27855	0.296381
71.7825	-39.1254	0.316245	0.240683	0.385949	0.271417	0.202369	0.319085	0.266469	0.253209	0.257666	0.319723	0.288485	0.246122	0.287556	0.319897	0.293802	0.280805	0.280115	0.297859
71.7785	-39.1325	0.31625	0.240684	0.385955	0.324068	0.188963	0.314263	0.266475	0.301051	0.221976	0.339326	0.284437	0.248315	0.287718	0.314336	0.293806	0.279564	0.27693	0.302289
71.7759	-39.1372	0.316255	0.240686	0.385961	0.355755	0.185774	0.304601	0.266481	0.333009	0.198136	0.354049	0.282491	0.252587	0.285404	0.312571	0.293869	0.280848	0.272208	0.305262
71.7719	-39.1442	0.31626	0.240687	0.385968	0.366335	0.189368	0.294923	0.266488	0.357018	0.192309	0.354303	0.280463	0.256807	0.288089	0.31085	0.296537	0.284676	0.265956	0.311247
71.7692	-39.1489	0.316265	0.240688	0.385974	0.345204	0.196154	0.29493	0.266494	0.357026	0.204409	0.344726	0.28047	0.256813	0.29568	0.305277	0.299119	0.285961	0.267582	0.311289
71.7652	-39.156	0.31627	0.240689	0.38598	0.313568	0.206311	0.279992	0.286301	0.317038	0.240316	0.32521	0.286816	0.256818	0.300745	0.301562	0.300413	0.281003	0.280253	0.305396
71.7612	-39.163	0.323029	0.232529	0.385987	0.313574	0.206315	0.270053	0.306203	0.269297	0.270088	0.315411	0.291043	0.250586	0.308179	0.305371	0.297898	0.274784	0.289722	0.303922
71.7586	-39.1677	0.329823	0.232553	0.374362	0.313579	0.206319	0.270059	0.319657	0.253569	0.270094	0.315418	0.29105	0.246435	0.310603	0.311042	0.295381	0.272299	0.292874	0.303924
71.7546	-39.1747	0.333237	0.240773	0.35688	0.313585	0.206323	0.270065	0.333128	0.237819	0.270101	0.315426	0.291057	0.248518	0.30055	0.322335	0.291602	0.277279	0.284988	0.306889
71.7519	-39.1794	0.333242	0.240775	0.356886	0.313591	0.206328	0.27007	0.333136	0.237825	0.270107	0.315433	0.291064	0.252681	0.293078	0.328006	0.289084	0.283505	0.273935	0.312816
71.7479	-39.1865	0.333247	0.240776	0.369009	0.271788	0.202625	0.284601	0.333143	0.23783	0.270114	0.315441	0.29107	0.256847	0.298244	0.32248	0.287826	0.289732	0.262879	0.317257
71.7452	-39.1912	0.333253	0.240777	0.381153	0.229982	0.202414	0.294272	0.333151	0.237836	0.27012	0.315448	0.291077	0.256852	0.308372	0.311235	0.287775	0.292188	0.259705	0.315752
71.7412	-39.1983	0.333258	0.240778	0.387237	0.209079	0.20579	0.294278	0.319693	0.253599	0.270126	0.315456	0.291084	0.250619	0.315806	0.301724	0.28635	0.293323	0.262825	0.30978
71.7385	-39.203	0.333263	0.24078	0.387243	0.209083	0.205794	0.294285	0.306252	0.269342	0.258029	0.325057	0.291091	0.246468	0.310639	0.305369	0.286298	0.289555	0.270708	0.302353
71.7345	-39.2101	0.333269	0.240781	0.38725	0.209087	0.205799	0.299263	0.292953	0.277209	0.239905	0.339435	0.295483	0.242426	0.295476	0.316529	0.28888	0.282131	0.277012	0.296412
71.7319	-39.2148	0.333274	0.240782	0.387256	0.230123	0.199055	0.309224	0.27977	0.277216	0.245951	0.334656	0.299878	0.242537	0.285479	0.324055	0.291518	0.27723	0.277014	0.296414
71.7279	-39.2219	0.333279	0.240783	0.387263	0.261742	0.195885	0.309533	0.273287	0.269361	0.264098	0.320285	0.302081	0.246757	0.275528	0.329723	0.296737	0.274851	0.273891	0.297922
71.7252	-39.2267	0.333285	0.240785	0.387269	0.282839	0.196101	0.29986	0.286744	0.253628	0.270159	0.315494	0.302088	0.246762	0.278059	0.327872	0.299321	0.278623	0.272366	0.297962
71.7212	-39.2338	0.32309	0.253064	0.405514	0.283347	0.189427	0.304992	0.300477	0.230087	0.276321	0.310808	0.299985	0.25301	0.280742	0.322349	0.299355	0.28736	0.274053	0.295077
71.7172	-39.241	0.316339	0.261251	0.417706	0.283659	0.186136	0.315136	0.30087	0.230364	0.282703	0.306321	0.300242	0.255266	0.291068	0.316993	0.293052	0.298572	0.275751	0.292198
71.7145	-39.2458	0.316343	0.261252	0.417713	0.304851	0.186334	0.305446	0.300877	0.254348	0.276953	0.311449	0.302699	0.253409	0.298828	0.317253	0.285481	0.304804	0.278992	0.290776
71.7105	-39.253	0.316348	0.261253	0.417721	0.315463	0.189938	0.29574	0.300884	0.278367	0.27119	0.326425	0.298722	0.255664	0.304113	0.323236	0.27798	0.309849	0.282258	0.293832
71.7078	-39.2578	0.316353	0.261255	0.417728	0.315469	0.189942	0.295747	0.300891	0.278374	0.271197	0.336284	0.294489	0.257757	0.309245	0.32337	0.276771	0.309891	0.283874	0.299811
71.7038	-39.265	0.316358	0.261256	0.417735	0.315475	0.189946	0.295753	0.300898	0.254366	0.289122	0.341221	0.292374	0.253589	0.316758	0.323418	0.274218	0.309875	0.291818	0.299849
71.7011	-39.2697	0.316363	0.261257	0.417742	0.315482	0.18995	0.290762	0.307527	0.238385	0.301057	0.341229	0.292381	0.249424	0.316655	0.323339	0.274171	0.30984	0.294977	0.299851
71.6971	-39.2768	0.316368	0.261259	0.417749	0.283692	0.200155	0.275794	0.327374	0.238391	0.301064	0.341237	0.292388	0.247345	0.303926	0.324995	0.277917	0.306067	0.298099	0.299826
71.6944	-39.2816	0.316373	0.26126	0.417756	0.262542	0.206946	0.270815	0.333986	0.254384	0.289142	0.341245	0.292395	0.25152	0.288831	0.328639	0.28045	0.303578	0.299666	0.298331
71.6903	-39.2887	0.316378	0.261261	0.417763	0.262547	0.199947	0.285521	0.347645	0.254703	0.271229	0.341253	0.292401	0.257785	0.276316	0.330463	0.281718	0.303582	0.294898	0.307231
71.6876	-39.2934	0.316383	0.261262	0.41777	0.262552	0.192958	0.305206	0.347956	0.238881	0.271235	0.341261	0.292408	0.25779	0.281388	0.326744	0.284303	0.301132	0.29331	0.314662
71.6836	-39.3004	0.316388	0.261264	0.417777	0.262557	0.189469	0.330045	0.32148	0.238887	0.271242	0.341269	0.294616	0.255765	0.294068	0.317432	0.288179	0.298699	0.291735	0.320616
71.6808	-39.3051	0.316393	0.261265	0.417784	0.262562	0.189473	0.34006	0.294699	0.254721	0.271248	0.341277	0.299027	0.251706	0.306754	0.310019	0.288211	0.299967	0.288581	0.323593
71.6768	-39.3121	0.316398	0.261266	0.417791	0.294316	0.179291	0.345077	0.267808	0.278433	0.271255	0.341286	0.303442	0.247643	0.327073	0.300807	0.288296	0.302519	0.283872	0.323615
71.6727	-39.3191	0.316402	0.261268	0.40561	0.33638	0.179478	0.320374	0.287716	0.278439	0.271261	0.341294	0.310062	0.241544	0.337243	0.300968	0.284533	0.307527	0.282343	0.317703
71.67	-39.3237	0.316407	0.261269	0.393449	0.357201	0.186481	0.300678	0.307717	0.270549	0.271268	0.35116	0.31024	0.241651	0.332281	0.308611	0.280767	0.31129	0.27921	0.314748
71.666	-39.3307	0.316412	0.26127	0.399537	0.346805	0.200503	0.28624	0.321377	0.262853	0.259319	0.365974	0.308289	0.245939	0.312175	0.325644	0.278316	0.315092	0.276099	0.31181
71.6634	-39.3354	0.316417	0.261272	0.411722	0.325978	0.204016	0.291382	0.328426	0.25515	0.247356	0.370919	0.310588	0.246047	0.299585	0.335074	0.277079	0.317609	0.276134	0.310351
71.6595	-39.3424	0.316422	0.261273	0.42392	0.305129	0.186489	0.340753	0.315569	0.239396	0.247448	0.380933	0.302008	0.252274	0.289532	0.344545	0.277158	0.31767	0.277762	0.305924
71.6569	-39.3471	0.316427	0.265392	0.430297	0.284258	0.172503	0.370197	0.302274	0.255455	0.247637	0.376249	0.29547	0.256354	0.294616	0.340818	0.279748	0.316464	0.277775	0.304446
71.6531	-39.3541	0.316432	0.277774	0.424993	0.26335	0.162032	0.384728	0.2955	0.287509	0.247911	0.361785	0.288856	0.260378	0.304735	0.329487	0.287431	0.309038	0.282519	0.301471
71.6505	-39.3587	0.316437	0.281912	0.413029	0.273816	0.165526	0.36986	0.295261	0.30337	0.260101	0.347192	0.284374	0.262308	0.309719	0.32376	0.296407	0.297886	0.287238	0.299968
71.6467	-39.3656	0.316442	0.281913	0.388618	0.315593	0.179508	0.325435	0.301402	0.310927	0.284199	0.317663	0.2862	0.26	0.312	0.31787	0.309149	0.284219	0.287146	0.304364
71.6441	-39.3701	0.316447	0.281915	0.370354	0.346852	0.186512	0.305729	0.301152	0.294641	0.289875	0.307502	0.29462	0.257863	0.306823	0.319617	0.311653	0.279216	0.285499	0.308775
71.6403	-39.3769	0.323212	0.273706	0.3582	0.367658	0.200536	0.286291	0.294409	0.278505	0.277402	0.316847	0.303187	0.260012	0.299321	0.321489	0.302608	0.282842	0.285453	0.311716
71.6377	-39.3813	0.330013	0.265498	0.364284	0.357269	0.207563	0.286561	0.287909	0.286636	0.271532	0.326811	0.303444	0.262274	0.296991	0.321621	0.292357	0.291484	0.283889	0.311727
71.6339	-39.388	0.333429	0.261395	0.388644	0.315617	0.207567	0.306607	0.2884	0.311197	0.272232	0.342392	0.297651	0.264762	0.297397	0.325784	0.280992	0.301481	0.282406	0.308827
71.6301	-39.3947	0.343682	0.257363	0.401357	0.273848	0.207572	0.321671	0.302322	0.31182	0.272729	0.36278	0.293944	0.265153	0.297752	0.333734	0.277394	0.307869	0.280966	0.310425
71.6275	-39.3991	0.350564	0.257421	0.395744	0.273997	0.204173	0.321678	0.322685	0.296069	0.272833	0.367866	0.294106	0.267366	0.292812	0.339524	0.278791	0.31046	0.281047	0.314955
71.6237	-39.4057	0.350569	0.261552	0.389874	0.305874	0.193952	0.321685	0.336279	0.280177	0.27284	0.352997	0.300517	0.267372	0.292818	0.341444	0.282702	0.314282	0.279534	0.326924
71.6211	-39.4101	0.350575	0.261554	0.38988	0.316521	0.190542	0.321692	0.336287	0.280184	0.272846	0.333191	0.304626	0.267267	0.297818	0.337621	0.285245	0.316783	0.277966	0.332893
71.6173	-39.4167	0.350581	0.261555	0.389887	0.316528	0.190545	0.321699	0.31592	0.279866	0.290885	0.318355	0.304389	0.262916	0.310299	0.331886	0.289055	0.316786	0.277968	0.329916
71.6147	-39.4211	0.350587	0.261557	0.389894	0.316534	0.190549	0.321707	0.302365	0.279655	0.290675	0.337943	0.300138	0.254547	0.320276	0.328065	0.290302	0.315522	0.281134	0.32694
71.6109	-39.4277	0.350593	0.261558	0.383784	0.327003	0.190553	0.321714	0.302372	0.279661	0.272375	0.367318	0.29375	0.248276	0.327754	0.326157	0.287692	0.314222	0.284276	0.329902
71.6083	-39.4321	0.343722	0.269763	0.371572	0.34791	0.190557	0.321721	0.302379	0.279668	0.272382	0.367327	0.293757	0.248281	0.327761	0.329989	0.283865	0.312958	0.284256	0.332865
71.6045	-39.4386	0.333477	0.28207	0.35938	0.368782	0.194073	0.316857	0.309166	0.271741	0.272388	0.367336	0.293764	0.254563	0.320295	0.331909	0.2826	0.310465	0.285828	0.334347
71.602	-39.443	0.333483	0.282072	0.359386	0.368789	0.201109	0.307111	0.322745	0.255866	0.272395	0.367344	0.293771	0.262944	0.310329	0.333828	0.281335	0.310468	0.285831	0.334349
71.5983	-39.4495	0.333488	0.282073	0.359392	0.368796	0.201114	0.307118	0.336341	0.239971	0.272401	0.367353	0.293777	0.273427	0.30295	0.335833	0.277532	0.310471	0.287425	0.332871
71.5957	-39.4538	0.333493	0.282075	0.359398	0.368804	0.194086	0.316879	0.336349	0.239976	0.272408	0.372315	0.296073	0.273547	0.303055	0.334009	0.276266	0.310475	0.290613	0.329913
71.592	-39.4604	0.333499	0.282077	0.359405	0.368811	0.183552	0.3315	0.336357	0.239982	0.272414	0.387196	0.296316	0.269527	0.30311	0.332141	0.27627	0.314223	0.289057	0.326954
71.5882	-39.467	0.336912	0.277977	0.359411	0.368818	0.173036	0.346095	0.336365	0.239988	0.272421	0.392168	0.294187	0.269532	0.303116	0.332147	0.278862	0.316761	0.282733	0.326956
71.5857	-39.4714	0.343761	0.269775	0.371616	0.369242	0.16621	0.346103	0.336373	0.256085	0.26042	0.392177	0.294194	0.269538	0.303122	0.332152	0.281455	0.316801	0.279572	0.323979
71.582	-39.4779	0.350645	0.261573	0.389961	0.369873	0.166468	0.331522	0.33638	0.280264	0.242388	0.387224	0.296337	0.265348	0.308124	0.330243	0.282728	0.316804	0.274796	0.323954
71.5795	-39.4822	0.35065	0.261574	0.389968	0.36988	0.177011	0.316914	0.343182	0.27232	0.248495	0.37248	0.300613	0.26116	0.313123	0.326419	0.282682	0.316771	0.274777	0.323938
71.5758	-39.4888	0.350656	0.261576	0.389974	0.369887	0.187569	0.302284	0.363598	0.264567	0.254793	0.348058	0.304885	0.25907	0.307983	0.328216	0.282636	0.31424	0.276328	0.323913
71.5733	-39.4931	0.350662	0.261578	0.402216	0.348965	0.194617	0.29252	0.370417	0.272745	0.248868	0.34322	0.304892	0.259076	0.302897	0.333879	0.281371	0.311746	0.277901	0.326884
71.5696	-39.4996	0.361012	0.249319	0.420615	0.317509	0.205201	0.292928	0.350451	0.280829	0.242846	0.353139	0.300634	0.265371	0.297959	0.337756	0.277566	0.311749	0.284273	0.326923
71.5671	-39.5039	0.367958	0.241147	0.420622	0.317516	0.208737	0.298104	0.33712	0.280836	0.242852	0.363068	0.296371	0.27167	0.295563	0.339763	0.275055	0.31302	0.289075	0.32697
71.5634	-39.5103	0.367964	0.241149	0.420629	0.317522	0.198154	0.312796	0.337128	0.280842	0.242857	0.373002	0.298748	0.271844	0.298262	0.338023	0.276426	0.315594	0.297111	0.324091
71.5609	-39.5145	0.364496	0.245237	0.420637	0.317528	0.191112	0.322575	0.337136	0.280849	0.242863	0.382941	0.298912	0.27406	0.295864	0.338112	0.277774	0.316901	0.301939	0.321174
71.5572	-39.5209	0.354131	0.257499	0.420644	0.317534	0.191116	0.332652	0.323801	0.264703	0.254922	0.392889	0.29464	0.28037	0.290911	0.341993	0.280441	0.316996	0.308375	0.315292
71.5547	-39.5251	0.350697	0.261587	0.420651	0.317541	0.187596	0.347629	0.296826	0.264513	0.266968	0.392898	0.296863	0.278332	0.296017	0.33825	0.283036	0.317035	0.309995	0.310847
71.551	-39.5315	0.350702	0.261589	0.420658	0.317547	0.177044	0.36732	0.269744	0.28033	0.272989	0.392908	0.303523	0.270097	0.306182	0.332627	0.28304	0.317039	0.305215	0.309334
71.5473	-39.5378	0.350708	0.261591	0.420666	0.317553	0.173534	0.3722	0.26975	0.280336	0.272995	0.392917	0.305749	0.261752	0.313694	0.332633	0.283044	0.317042	0.297248	0.310785
71.5448	-39.5421	0.350714	0.261592	0.420673	0.317559	0.173538	0.372209	0.276553	0.27239	0.273002	0.392926	0.305756	0.259657	0.3162	0.332638	0.283048	0.318295	0.29248	0.31226
71.5411	-39.5485	0.35072	0.261594	0.42068	0.317565	0.173541	0.372217	0.296975	0.25657	0.266993	0.392935	0.305763	0.259663	0.316206	0.336479	0.280509	0.324546	0.284568	0.319713
71.5386	-39.5527	0.350726	0.261595	0.420688	0.317572	0.173545	0.372225	0.303795	0.26474	0.254959	0.392945	0.30577	0.259668	0.316212	0.34032	0.277969	0.3283	0.27982	0.328656
71.5349	-39.5591	0.340423	0.273903	0.420695	0.317578	0.173549	0.372234	0.296989	0.288875	0.242909	0.392954	0.301339	0.263769	0.316218	0.346081	0.274157	0.325803	0.287771	0.328684
71.5325	-39.5634	0.3336	0.28625	0.414826	0.317584	0.177066	0.36737	0.28338	0.304812	0.242915	0.392963	0.296911	0.267867	0.316224	0.349924	0.274207	0.318344	0.300482	0.319778
71.5288	-39.5697	0.333605	0.298702	0.397171	0.31759	0.187628	0.352738	0.269788	0.328807	0.243007	0.393098	0.292561	0.269918	0.321334	0.351935	0.275578	0.30967	0.313203	0.309388
71.5263	-39.574	0.333611	0.302863	0.39128	0.317596	0.194679	0.342974	0.276592	0.337028	0.243186	0.393357	0.286068	0.27617	0.321445	0.352026	0.275628	0.309708	0.313229	0.307916
71.5226	-39.5804	0.333616	0.302865	0.391286	0.317603	0.205266	0.328304	0.297016	0.321237	0.249405	0.393615	0.275139	0.288612	0.321604	0.348319	0.276952	0.315997	0.308529	0.30795
71.5202	-39.5846	0.333621	0.302867	0.391293	0.317609	0.208803	0.323411	0.303838	0.297094	0.261483	0.393624	0.27293	0.294864	0.321714	0.340727	0.279503	0.322252	0.303804	0.309458
71.5165	-39.591	0.333627	0.302868	0.40972	0.286105	0.205275	0.328319	0.303845	0.280942	0.273547	0.393633	0.272937	0.30118	0.31676	0.331175	0.282005	0.330972	0.295886	0.312442
71.514	-39.5953	0.333632	0.30287	0.422032	0.265059	0.19822	0.333067	0.310541	0.26479	0.285611	0.383685	0.277231	0.299082	0.31416	0.3311	0.281961	0.33344	0.295889	0.310953
71.5103	-39.6017	0.333638	0.302872	0.42204	0.265064	0.180609	0.342379	0.33059	0.240593	0.303676	0.368775	0.285875	0.290738	0.306355	0.332782	0.284435	0.329636	0.30061	0.307949
71.5066	-39.6081	0.333643	0.302874	0.422047	0.265069	0.173581	0.347103	0.337269	0.25673	0.291648	0.368784	0.294746	0.280467	0.30376	0.332705	0.29087	0.317193	0.303723	0.309402
71.5041	-39.6124	0.333648	0.302876	0.422054	0.265074	0.180617	0.347433	0.337556	0.265013	0.273579	0.378737	0.299345	0.276492	0.303863	0.33471	0.29484	0.311051	0.300548	0.312376
71.5003	-39.6189	0.340484	0.29465	0.422062	0.26508	0.205292	0.343509	0.345227	0.257628	0.249625	0.403891	0.299894	0.278991	0.306809	0.335084	0.30026	0.302522	0.300616	0.316899
71.4978	-39.6232	0.347355	0.286424	0.422069	0.265085	0.222971	0.339235	0.352646	0.250009	0.243838	0.414263	0.300283	0.283489	0.312268	0.333527	0.301764	0.295165	0.308627	0.319948
71.494	-39.6297	0.350807	0.282312	0.422077	0.26509	0.240698	0.329863	0.366806	0.242353	0.268769	0.400306	0.305125	0.288107	0.322962	0.330192	0.299439	0.299063	0.310361	0.320055
71.4914	-39.6341	0.350812	0.282314	0.422084	0.265095	0.244253	0.319875	0.3804	0.242449	0.293517	0.375902	0.309592	0.290338	0.328246	0.330386	0.294365	0.317862	0.294576	0.318612
71.4875	-39.6408	0.350818	0.282316	0.422091	0.2651	0.23716	0.314536	0.373083	0.250217	0.311706	0.350923	0.315893	0.286007	0.333185	0.339943	0.28274	0.339056	0.285107	0.314178
71.4849	-39.6452	0.350824	0.282318	0.422099	0.265106	0.226532	0.314118	0.358948	0.257859	0.311277	0.350503	0.317806	0.277405	0.335399	0.345486	0.278778	0.336446	0.296205	0.314172
71.481	-39.6519	0.35083	0.269889	0.439788	0.265111	0.212388	0.3186	0.331192	0.273359	0.29846	0.364686	0.313039	0.27498	0.32992	0.348975	0.277325	0.332552	0.305668	0.315627
71.4784	-39.6564	0.350835	0.261626	0.451556	0.265116	0.201795	0.338351	0.304055	0.281129	0.298259	0.369444	0.30852	0.279033	0.322198	0.346893	0.27981	0.335004	0.302467	0.315605
71.4744	-39.6631	0.350841	0.261628	0.451564	0.265121	0.201799	0.353519	0.290789	0.273158	0.304402	0.374551	0.302017	0.283195	0.322255	0.337329	0.287508	0.328786	0.300842	0.314084
71.4718	-39.6677	0.350847	0.261629	0.451571	0.265126	0.212401	0.343889	0.311388	0.257397	0.304624	0.37978	0.300032	0.283314	0.324922	0.33361	0.292729	0.321368	0.302429	0.311103
71.4678	-39.6745	0.350853	0.261631	0.451579	0.265132	0.230097	0.31936	0.359283	0.241858	0.286713	0.390009	0.30257	0.2836	0.320055	0.337578	0.295452	0.321491	0.297718	0.308153
71.4638	-39.6814	0.350859	0.261632	0.451587	0.265137	0.240743	0.304605	0.373	0.25827	0.262507	0.395014	0.311563	0.283883	0.317743	0.34159	0.293001	0.329076	0.293034	0.308208
71.4611	-39.6859	0.350864	0.261634	0.451595	0.265142	0.230107	0.319374	0.373009	0.27452	0.250392	0.395024	0.316028	0.283999	0.317846	0.341675	0.294352	0.331637	0.293087	0.308247
71.4571	-39.6928	0.35087	0.265766	0.445725	0.297201	0.202135	0.34392	0.359308	0.282445	0.256461	0.395033	0.318265	0.288285	0.317997	0.339874	0.295703	0.334197	0.294736	0.308294
71.4544	-39.6974	0.350876	0.274042	0.43396	0.31862	0.191737	0.348827	0.345623	0.282241	0.268582	0.395042	0.318272	0.292518	0.318099	0.339957	0.293154	0.336707	0.294758	0.309802
71.4503	-39.7044	0.350882	0.282336	0.422173	0.318626	0.198809	0.339033	0.338791	0.282142	0.280788	0.39018	0.318279	0.292524	0.323236	0.334264	0.298335	0.333003	0.29476	0.312788
71.4476	-39.709	0.350887	0.282338	0.42218	0.318632	0.205892	0.329223	0.352485	0.266133	0.293101	0.380437	0.318287	0.29253	0.328375	0.326644	0.302191	0.33177	0.294762	0.31279
71.4435	-39.716	0.340578	0.294682	0.422188	0.318639	0.220072	0.309569	0.373052	0.242079	0.305426	0.370682	0.318294	0.292536	0.330949	0.32476	0.298294	0.331722	0.297928	0.312785
71.4408	-39.7207	0.33375	0.302912	0.422195	0.318645	0.227177	0.299727	0.373061	0.250196	0.299381	0.370691	0.31607	0.290372	0.33599	0.32284	0.298275	0.32795	0.301084	0.312771
71.4368	-39.7277	0.333755	0.302914	0.422202	0.318651	0.227182	0.299734	0.359359	0.290611	0.281209	0.3707	0.309391	0.29021	0.335843	0.322735	0.299506	0.324161	0.301035	0.309751
71.434	-39.7325	0.33376	0.302916	0.409899	0.339718	0.220086	0.30959	0.345672	0.314774	0.275149	0.370709	0.30717	0.290159	0.333234	0.322665	0.298162	0.324113	0.299409	0.306739
71.4299	-39.7395	0.333766	0.302918	0.391477	0.37125	0.209458	0.324345	0.34568	0.322908	0.269092	0.370717	0.302721	0.287942	0.335652	0.320672	0.295494	0.322779	0.300945	0.300737
71.4272	-39.7442	0.337184	0.298806	0.391484	0.371257	0.209462	0.324353	0.359384	0.31502	0.26303	0.370726	0.298274	0.285724	0.335505	0.322489	0.292852	0.322714	0.302502	0.296242
71.4231	-39.7513	0.34748	0.286465	0.391491	0.371264	0.205923	0.329275	0.373104	0.29085	0.269104	0.360741	0.298131	0.28351	0.330231	0.326151	0.287589	0.32635	0.299269	0.293217
71.419	-39.7583	0.350934	0.282352	0.391498	0.371272	0.195311	0.344005	0.366255	0.274498	0.26883	0.36042	0.297908	0.283347	0.324963	0.329808	0.283627	0.32875	0.296038	0.293175
71.4162	-39.763	0.350939	0.282354	0.391505	0.371279	0.191781	0.338793	0.365969	0.266181	0.274712	0.370179	0.295692	0.281189	0.322308	0.331618	0.283584	0.328717	0.296019	0.29167
71.4121	-39.7699	0.350945	0.282356	0.391511	0.371286	0.191785	0.323644	0.372372	0.241668	0.304966	0.370188	0.295699	0.281195	0.317196	0.333465	0.279671	0.333653	0.294425	0.294647
71.4093	-39.7745	0.350951	0.282358	0.397657	0.360793	0.191789	0.323651	0.372381	0.217388	0.323093	0.370196	0.295705	0.281201	0.319761	0.331589	0.27708	0.337373	0.296034	0.299136
71.4052	-39.7814	0.350957	0.28236	0.41611	0.329244	0.191793	0.323658	0.37239	0.20122	0.335167	0.370205	0.295712	0.287529	0.322477	0.324064	0.280976	0.338683	0.302462	0.305164
71.4025	-39.7859	0.357859	0.274163	0.422276	0.318714	0.191797	0.323665	0.386087	0.201377	0.329257	0.36534	0.295719	0.293862	0.325194	0.320378	0.282325	0.339994	0.307295	0.309694
71.3983	-39.7928	0.37175	0.257783	0.434601	0.319074	0.199075	0.314154	0.393276	0.217813	0.323674	0.365797	0.293803	0.296152	0.333093	0.316798	0.283744	0.343863	0.312184	0.317246
71.3956	-39.7974	0.378685	0.249617	0.446946	0.319433	0.209924	0.309804	0.380193	0.234212	0.317969	0.371146	0.294106	0.29639	0.335868	0.316986	0.286463	0.345248	0.312272	0.324771
71.3915	-39.8043	0.395674	0.229239	0.45313	0.319615	0.224259	0.315582	0.367362	0.250839	0.312449	0.381736	0.29909	0.296915	0.336329	0.325022	0.288068	0.345504	0.312421	0.333837
71.3887	-39.8088	0.402496	0.2211	0.459312	0.330544	0.220932	0.330971	0.354198	0.259173	0.318963	0.392247	0.301776	0.2952	0.336633	0.332959	0.289601	0.345701	0.314134	0.335423
71.3847	-39.8157	0.4025	0.221102	0.477871	0.331102	0.203457	0.376505	0.327612	0.267623	0.313209	0.412717	0.311253	0.289454	0.339606	0.34102	0.29771	0.344776	0.319114	0.334086
71.382	-39.8203	0.402505	0.221103	0.484073	0.320511	0.189241	0.406437	0.327871	0.259667	0.319511	0.412977	0.318139	0.289725	0.339857	0.343143	0.30567	0.343724	0.324024	0.331198
71.378	-39.8272	0.40251	0.221105	0.484082	0.320517	0.167973	0.435936	0.341675	0.24353	0.338119	0.38315	0.324643	0.2961	0.342586	0.345229	0.311004	0.346385	0.328936	0.331296
71.374	-39.8341	0.3957	0.229247	0.48409	0.320524	0.157363	0.450656	0.341683	0.243535	0.319526	0.372773	0.328739	0.302311	0.342592	0.347168	0.307118	0.357659	0.321003	0.341775
71.3714	-39.8386	0.388918	0.23739	0.484099	0.309757	0.160824	0.445562	0.348457	0.243541	0.307148	0.372559	0.330826	0.304384	0.337443	0.349031	0.301884	0.363857	0.316204	0.349231
71.3675	-39.8453	0.38554	0.253849	0.466394	0.277494	0.181794	0.415566	0.361838	0.243458	0.307052	0.377477	0.330833	0.302266	0.324521	0.352674	0.296585	0.367489	0.312958	0.355161
71.365	-39.8497	0.385546	0.262132	0.454565	0.266759	0.195876	0.390649	0.361559	0.243287	0.306852	0.387297	0.330841	0.298027	0.319285	0.352525	0.296499	0.367422	0.311323	0.355126
71.3611	-39.8563	0.385552	0.262134	0.448379	0.245153	0.216859	0.36063	0.368027	0.243114	0.300466	0.402008	0.324128	0.293626	0.31906	0.348476	0.300252	0.361078	0.312839	0.353574
71.3586	-39.8607	0.385558	0.262136	0.436011	0.244899	0.227293	0.345541	0.381509	0.234971	0.294194	0.411812	0.315181	0.293412	0.324023	0.344545	0.301466	0.356009	0.317572	0.350557
71.3548	-39.8672	0.385565	0.262138	0.423664	0.244616	0.234171	0.330312	0.394819	0.218615	0.300075	0.416586	0.301695	0.297266	0.328931	0.342508	0.300074	0.350907	0.323882	0.341557
71.3523	-39.8715	0.385571	0.26214	0.423672	0.223229	0.241037	0.325247	0.387787	0.226596	0.293802	0.416345	0.297088	0.29916	0.331363	0.340508	0.298706	0.349587	0.323833	0.33704
71.3485	-39.8779	0.385577	0.262142	0.423679	0.201861	0.247898	0.325254	0.374049	0.24269	0.275312	0.415972	0.299105	0.294821	0.336309	0.33851	0.293435	0.349467	0.322164	0.335489
71.346	-39.8821	0.385583	0.262144	0.423687	0.180513	0.254752	0.325262	0.360312	0.258782	0.275319	0.405961	0.30789	0.288594	0.333695	0.342294	0.288235	0.351908	0.31735	0.335454
71.3422	-39.8883	0.385589	0.262146	0.423694	0.169853	0.258177	0.325269	0.339731	0.282883	0.275325	0.395958	0.318907	0.282418	0.331133	0.344188	0.284336	0.355618	0.306163	0.335403
71.3397	-39.8925	0.385595	0.262148	0.423702	0.191192	0.251339	0.335426	0.32629	0.299158	0.263192	0.395967	0.318914	0.286654	0.32867	0.344232	0.285663	0.354404	0.30138	0.33539
71.336	-39.8986	0.385601	0.262149	0.423709	0.233944	0.237633	0.350682	0.333546	0.291475	0.251126	0.401106	0.321315	0.288942	0.32887	0.342464	0.292241	0.349534	0.301421	0.330942
71.3322	-39.9048	0.385607	0.262151	0.423717	0.298244	0.217012	0.360861	0.361356	0.243175	0.269642	0.406497	0.321639	0.289166	0.331643	0.340731	0.298846	0.34593	0.304679	0.325028
71.3297	-39.9089	0.385613	0.262153	0.436081	0.320088	0.206781	0.366126	0.368546	0.218983	0.275824	0.411644	0.324042	0.289336	0.331794	0.34085	0.300221	0.347256	0.306328	0.322086
71.326	-39.915	0.385619	0.262155	0.454663	0.32062	0.207095	0.356429	0.375601	0.202837	0.288181	0.411908	0.328688	0.289557	0.334568	0.339112	0.297712	0.353568	0.307997	0.319156
71.3235	-39.9191	0.385625	0.262157	0.454671	0.320627	0.210663	0.351496	0.368707	0.21092	0.300551	0.402121	0.330936	0.291738	0.334671	0.341122	0.293875	0.356081	0.309618	0.319178
71.3199	-39.9252	0.385631	0.262159	0.454679	0.309856	0.214125	0.351504	0.341139	0.243198	0.306745	0.397227	0.328702	0.295935	0.332149	0.344991	0.291317	0.356085	0.311219	0.320681
71.3174	-39.9294	0.385637	0.262161	0.454687	0.288334	0.224597	0.346573	0.320497	0.267369	0.312936	0.392336	0.324229	0.300076	0.332155	0.348859	0.288759	0.356088	0.311222	0.320682
71.3137	-39.9355	0.385643	0.262163	0.467087	0.224152	0.249089	0.331741	0.306752	0.283467	0.331514	0.377627	0.319758	0.304213	0.332161	0.354661	0.284919	0.356091	0.309624	0.319183
71.3113	-39.9396	0.385649	0.258021	0.485431	0.181462	0.259547	0.326795	0.306759	0.291622	0.331639	0.372724	0.322004	0.302154	0.332168	0.354667	0.286225	0.354857	0.306427	0.319171
71.3076	-39.9458	0.385655	0.24562	0.509387	0.160117	0.262989	0.326803	0.320519	0.300009	0.313387	0.372733	0.328732	0.29596	0.332174	0.354672	0.290138	0.351146	0.30323	0.320653
71.3052	-39.9499	0.385661	0.241496	0.515296	0.160121	0.262995	0.32681	0.334296	0.292071	0.307301	0.372742	0.33098	0.293897	0.337331	0.347025	0.294008	0.349911	0.303232	0.320655
71.3016	-39.9561	0.385667	0.241498	0.509092	0.170757	0.263	0.326817	0.341194	0.284014	0.301111	0.377662	0.330988	0.29178	0.347596	0.333616	0.299135	0.347404	0.308014	0.322157
71.2991	-39.9603	0.385673	0.241499	0.496688	0.192001	0.263006	0.326825	0.341202	0.284021	0.288732	0.387487	0.330995	0.287541	0.352657	0.329758	0.3017	0.344897	0.314395	0.323667
71.291	-39.974	0.385679	0.241501	0.484305	0.213211	0.273727	0.301771	0.334057	0.300037	0.28246	0.392279	0.326441	0.289509	0.357714	0.320107	0.3068	0.341118	0.323955	0.326671
71.2857	-39.9831	0.385685	0.241503	0.465737	0.245001	0.280889	0.27658	0.326788	0.307756	0.282175	0.391936	0.32397	0.291418	0.354989	0.318043	0.309292	0.339817	0.325516	0.32964
71.2821	-39.9892	0.385691	0.24976	0.441577	0.266152	0.284473	0.271621	0.313059	0.315687	0.275909	0.396721	0.32166	0.291315	0.347168	0.323662	0.309248	0.339787	0.3223	0.331107
71.2767	-39.9983	0.385697	0.26218	0.405302	0.297854	0.295227	0.261799	0.299464	0.323724	0.275916	0.39673	0.31943	0.293385	0.32916	0.336917	0.305345	0.342249	0.319093	0.329593
71.2731	-40.0043	0.385703	0.262182	0.392983	0.340388	0.291945	0.272101	0.286096	0.315702	0.282098	0.391845	0.321674	0.291327	0.321451	0.346454	0.301489	0.34349	0.319095	0.328101
71.2676	-40.0134	0.38571	0.270473	0.381141	0.37262	0.285202	0.307964	0.259484	0.299854	0.294667	0.392325	0.324238	0.285244	0.324124	0.354296	0.293838	0.347275	0.319138	0.328131
71.264	-40.0194	0.385716	0.278783	0.369276	0.394127	0.285492	0.323605	0.246218	0.300185	0.301168	0.39281	0.326801	0.283392	0.332041	0.352644	0.290066	0.352349	0.31921	0.329676
71.2585	-40.0285	0.385722	0.282946	0.381837	0.394804	0.282325	0.34442	0.239892	0.300739	0.307889	0.393515	0.334018	0.285991	0.342839	0.34738	0.290309	0.357562	0.317758	0.334259
71.2548	-40.0347	0.385728	0.282948	0.394202	0.373672	0.282331	0.354706	0.253894	0.301177	0.302096	0.398913	0.33884	0.290563	0.343234	0.349612	0.294419	0.357768	0.316272	0.337326
71.2492	-40.044	0.385734	0.28295	0.394209	0.373679	0.282337	0.349573	0.281459	0.31792	0.277719	0.404084	0.343509	0.301428	0.333329	0.363358	0.305124	0.35307	0.316421	0.338931
71.2454	-40.0502	0.38574	0.282952	0.394217	0.373687	0.282343	0.339309	0.295079	0.30972	0.271421	0.403855	0.341104	0.305535	0.330706	0.371038	0.310398	0.350651	0.319662	0.340468
71.2397	-40.0597	0.385746	0.282954	0.394224	0.373694	0.282349	0.313671	0.322151	0.268645	0.277089	0.398236	0.333886	0.305047	0.327717	0.372591	0.31151	0.354301	0.32122	0.350913
71.2359	-40.0661	0.385752	0.282957	0.394231	0.373701	0.282355	0.303437	0.321902	0.268465	0.27691	0.398008	0.327001	0.300522	0.329981	0.366556	0.310006	0.356656	0.319548	0.356834
71.2301	-40.0757	0.385758	0.282959	0.394238	0.373709	0.282361	0.303444	0.308099	0.292812	0.295613	0.398491	0.318346	0.292033	0.358148	0.341688	0.307264	0.355271	0.319465	0.355276
71.2243	-40.0854	0.385764	0.282961	0.412798	0.341978	0.282367	0.318818	0.287744	0.333773	0.302337	0.394162	0.327719	0.292517	0.376705	0.322898	0.310014	0.351636	0.319515	0.344847
71.2204	-40.0919	0.38577	0.282963	0.4252	0.320781	0.282373	0.329086	0.274154	0.366603	0.296517	0.384424	0.336801	0.297044	0.366731	0.332684	0.312808	0.350542	0.3196	0.338928
71.2145	-40.1017	0.385776	0.282965	0.425207	0.320787	0.28238	0.329093	0.27416	0.399481	0.284451	0.374561	0.341311	0.30568	0.34117	0.357734	0.313012	0.356973	0.319729	0.337526
71.2106	-40.1083	0.385782	0.282967	0.425215	0.320794	0.282386	0.323969	0.287872	0.399639	0.278318	0.374569	0.336817	0.305576	0.335915	0.365341	0.310402	0.365749	0.318173	0.342041
71.2046	-40.1182	0.385788	0.282969	0.425222	0.3208	0.282392	0.308599	0.328992	0.350721	0.296733	0.374578	0.325579	0.296795	0.343248	0.363182	0.306334	0.374391	0.314945	0.352482
71.2007	-40.1248	0.392546	0.274783	0.42523	0.320806	0.282398	0.303486	0.342703	0.326208	0.308995	0.374587	0.321092	0.294567	0.345689	0.359239	0.304945	0.373053	0.316496	0.356937
71.1947	-40.1348	0.402726	0.262501	0.425238	0.320813	0.282404	0.303493	0.342711	0.326216	0.309002	0.384687	0.325747	0.294787	0.345889	0.355523	0.303687	0.366787	0.322868	0.355443
71.1908	-40.1414	0.402731	0.262504	0.425245	0.320819	0.28241	0.3035	0.342719	0.326224	0.30901	0.394795	0.33041	0.295004	0.346087	0.35955	0.305126	0.361877	0.327703	0.349502
71.1848	-40.1513	0.402735	0.262506	0.425253	0.320826	0.282416	0.303507	0.342727	0.326231	0.309017	0.399858	0.332746	0.295115	0.346189	0.363505	0.31567	0.353267	0.327752	0.349536
71.1809	-40.1579	0.40274	0.262508	0.425261	0.320832	0.282422	0.303514	0.342735	0.326239	0.309024	0.399867	0.332753	0.295121	0.346195	0.357697	0.319528	0.35327	0.322947	0.356998
71.1749	-40.1677	0.402745	0.26251	0.425268	0.320839	0.282428	0.318891	0.322377	0.326247	0.309031	0.399876	0.332761	0.295127	0.346201	0.349953	0.316829	0.356952	0.319718	0.359958
71.171	-40.1742	0.402749	0.258362	0.437419	0.310242	0.282434	0.329161	0.308785	0.326254	0.309039	0.399886	0.332768	0.297263	0.343671	0.353833	0.315571	0.354456	0.321313	0.356968
71.165	-40.1839	0.402754	0.245942	0.473851	0.310747	0.272061	0.329169	0.308792	0.326262	0.309046	0.399895	0.335027	0.301585	0.346403	0.365615	0.310568	0.352037	0.32776	0.354032
71.1591	-40.1935	0.402759	0.241812	0.486	0.321733	0.254346	0.344141	0.308799	0.32627	0.309053	0.399904	0.341793	0.297486	0.356804	0.373566	0.30161	0.360877	0.327844	0.355589
71.1551	-40.2	0.402764	0.241814	0.486009	0.321739	0.247172	0.354107	0.308807	0.326277	0.309061	0.399914	0.344055	0.295412	0.359399	0.373609	0.299019	0.368414	0.323082	0.3571
71.1492	-40.2097	0.402768	0.241816	0.498452	0.300469	0.247177	0.354116	0.308814	0.326285	0.309068	0.399923	0.339554	0.293182	0.359259	0.365743	0.304107	0.373401	0.319888	0.358592
71.1452	-40.2162	0.402773	0.241818	0.510915	0.279164	0.247182	0.354124	0.31574	0.318197	0.309075	0.399932	0.335056	0.293084	0.353994	0.361723	0.307903	0.373355	0.321466	0.357084
71.1393	-40.226	0.402778	0.241819	0.517159	0.2685	0.240009	0.364089	0.336528	0.293889	0.309082	0.399941	0.332812	0.295168	0.346245	0.357741	0.310412	0.368278	0.326214	0.35257
71.1353	-40.2327	0.402782	0.241821	0.517168	0.268505	0.232845	0.37404	0.350402	0.27767	0.30909	0.399951	0.332819	0.297305	0.343714	0.355809	0.3117	0.364508	0.327791	0.351063
71.1294	-40.2427	0.402787	0.241823	0.517178	0.268511	0.229269	0.379015	0.371229	0.261526	0.321666	0.39525	0.332982	0.299549	0.34386	0.357862	0.307872	0.362012	0.327784	0.352554
71.1255	-40.2493	0.402792	0.241825	0.517187	0.268516	0.229273	0.379023	0.378185	0.269842	0.321887	0.395484	0.333144	0.297528	0.351674	0.359953	0.304061	0.360789	0.329398	0.354065
71.1196	-40.259	0.402797	0.241827	0.517196	0.268522	0.240029	0.379524	0.378627	0.261912	0.309615	0.415739	0.326694	0.295453	0.367208	0.364056	0.302926	0.358387	0.33265	0.357106
71.1157	-40.2655	0.402801	0.241829	0.517206	0.268527	0.250803	0.374882	0.378924	0.245632	0.322104	0.415991	0.326849	0.295563	0.372494	0.36809	0.304362	0.35724	0.331104	0.36163
71.1099	-40.275	0.402806	0.24183	0.504749	0.289865	0.265186	0.370382	0.35848	0.245637	0.340857	0.41635	0.331598	0.300097	0.367667	0.374105	0.307147	0.357395	0.331195	0.364691
71.1061	-40.2812	0.402811	0.250101	0.480459	0.311168	0.275995	0.36571	0.344831	0.245643	0.340865	0.426507	0.336272	0.300312	0.362682	0.376128	0.311139	0.357488	0.334456	0.363247
71.1003	-40.2905	0.402815	0.262541	0.45643	0.32181	0.283213	0.355714	0.344839	0.245649	0.340873	0.426517	0.352108	0.296399	0.352553	0.378113	0.316422	0.360099	0.336132	0.361809
71.0945	-40.2998	0.40282	0.262543	0.456438	0.289394	0.29001	0.360726	0.330928	0.286641	0.322453	0.416379	0.358744	0.296455	0.344826	0.378045	0.317693	0.365126	0.337764	0.357343
71.0907	-40.306	0.402825	0.262545	0.456446	0.267827	0.289728	0.360426	0.330691	0.319405	0.303906	0.411204	0.356326	0.29631	0.342104	0.377902	0.317613	0.367587	0.337748	0.355835
71.0849	-40.3153	0.40283	0.262547	0.44402	0.289108	0.271747	0.369951	0.330315	0.343798	0.285174	0.405797	0.344715	0.302265	0.341838	0.369918	0.32002	0.369986	0.334491	0.358782
71.0811	-40.3215	0.402834	0.262549	0.431613	0.310354	0.264572	0.37992	0.316444	0.360045	0.27894	0.400629	0.337796	0.306276	0.344295	0.362088	0.32251	0.369927	0.331251	0.363236
71.0754	-40.3308	0.402839	0.262551	0.425421	0.320967	0.268167	0.37495	0.309517	0.368166	0.278947	0.400638	0.337804	0.304147	0.344255	0.350418	0.328897	0.369898	0.328029	0.367703
71.0716	-40.3372	0.402844	0.262553	0.425428	0.320973	0.275359	0.36499	0.309525	0.368175	0.278953	0.400647	0.346836	0.302229	0.339221	0.344642	0.331471	0.369902	0.329634	0.370705
71.0659	-40.3467	0.402848	0.262555	0.425436	0.32098	0.282562	0.355015	0.309532	0.368184	0.27896	0.41078	0.351524	0.304581	0.336861	0.342846	0.331544	0.369952	0.331266	0.378219
71.0621	-40.353	0.402853	0.262557	0.425443	0.320986	0.282568	0.355023	0.309539	0.368192	0.278966	0.420921	0.347173	0.306725	0.342094	0.344894	0.33033	0.371261	0.329699	0.382732
71.0564	-40.3624	0.402858	0.262559	0.425451	0.353369	0.27219	0.355031	0.323419	0.351969	0.297706	0.416223	0.342819	0.306731	0.355061	0.345071	0.329137	0.371326	0.326527	0.387239
71.0526	-40.3686	0.402863	0.262561	0.425459	0.375002	0.265259	0.355039	0.337316	0.335726	0.310217	0.416465	0.338462	0.306737	0.362847	0.347119	0.327921	0.370116	0.323339	0.388738
71.0469	-40.3779	0.402867	0.262563	0.425466	0.37501	0.265265	0.355047	0.344274	0.302872	0.328676	0.426625	0.340882	0.300486	0.370635	0.353055	0.322819	0.37015	0.32015	0.38874
71.0431	-40.3841	0.402872	0.262566	0.425474	0.375017	0.26527	0.355055	0.35818	0.27015	0.340969	0.426635	0.345413	0.296317	0.373236	0.355038	0.320247	0.371412	0.32016	0.387251
71.0374	-40.3934	0.402877	0.262568	0.425481	0.375025	0.265276	0.355063	0.379066	0.245724	0.340977	0.426645	0.345421	0.296323	0.373243	0.356986	0.318963	0.375195	0.320186	0.382781
71.0317	-40.4026	0.402881	0.26257	0.425489	0.375033	0.265282	0.355071	0.379075	0.24573	0.340985	0.426654	0.345428	0.302744	0.360421	0.360809	0.318967	0.376458	0.323404	0.378309
71.0279	-40.4087	0.402886	0.262572	0.425497	0.37504	0.265288	0.355079	0.379084	0.245736	0.328488	0.431497	0.34762	0.307029	0.350143	0.36463	0.317661	0.375186	0.326598	0.378311
71.0222	-40.4179	0.402891	0.262574	0.431705	0.364439	0.265293	0.355088	0.379092	0.245742	0.309761	0.431137	0.354175	0.307035	0.342368	0.370357	0.313737	0.375142	0.328179	0.381295
71.0184	-40.424	0.402896	0.262576	0.444131	0.343201	0.268898	0.350104	0.379101	0.245747	0.309768	0.426079	0.354101	0.30485	0.342285	0.374175	0.311122	0.377634	0.324973	0.384278
71.0127	-40.4331	0.4029	0.262578	0.456578	0.321927	0.279715	0.335113	0.37911	0.245753	0.309775	0.426089	0.347326	0.298286	0.354977	0.370258	0.311064	0.381368	0.320163	0.382763
71.009	-40.4393	0.402905	0.26258	0.456586	0.321934	0.283329	0.330114	0.379119	0.245759	0.309783	0.426099	0.345074	0.296104	0.360072	0.366379	0.312334	0.382615	0.321769	0.375284
71.0033	-40.4484	0.40291	0.262582	0.462813	0.3113	0.290552	0.325255	0.372311	0.253997	0.303648	0.431177	0.34516	0.298298	0.360174	0.362572	0.316265	0.378887	0.328187	0.37082
70.9995	-40.4546	0.402914	0.262584	0.475274	0.300815	0.294316	0.325536	0.372599	0.254184	0.297603	0.436383	0.345325	0.302682	0.355184	0.358763	0.321505	0.373914	0.333001	0.37683
70.9939	-40.4637	0.402919	0.275049	0.469904	0.311975	0.287517	0.335992	0.373032	0.246204	0.304049	0.436765	0.343305	0.311351	0.352872	0.349228	0.329365	0.366451	0.341024	0.387348
70.9901	-40.4699	0.402924	0.283383	0.457983	0.322831	0.287659	0.341304	0.373317	0.238129	0.310411	0.43702	0.341203	0.313552	0.358162	0.343538	0.3307	0.366484	0.341043	0.38886
70.9845	-40.479	0.402929	0.287552	0.452027	0.322837	0.298526	0.341743	0.373747	0.238376	0.316976	0.432439	0.343704	0.309486	0.36865	0.339854	0.325552	0.372786	0.336275	0.390373
70.9807	-40.4851	0.402933	0.295901	0.440089	0.322844	0.302157	0.347062	0.374031	0.230289	0.329619	0.427721	0.350662	0.303324	0.373949	0.339988	0.323022	0.3766	0.336319	0.393403
70.975	-40.4943	0.402938	0.304268	0.428128	0.32285	0.302164	0.357423	0.381315	0.222251	0.342389	0.418025	0.364437	0.297296	0.374194	0.349882	0.319304	0.381751	0.339622	0.394987
70.9694	-40.5034	0.402943	0.304271	0.428136	0.322857	0.30217	0.357431	0.381324	0.24708	0.342719	0.403101	0.368986	0.303836	0.366631	0.367475	0.319531	0.381921	0.344531	0.390581
70.9656	-40.5095	0.402948	0.308456	0.42216	0.322863	0.302177	0.357439	0.381333	0.247086	0.342727	0.398019	0.371183	0.308135	0.358924	0.38108	0.323591	0.380795	0.342992	0.389126
70.96	-40.5186	0.402952	0.321035	0.404181	0.32287	0.302183	0.341921	0.394912	0.255287	0.336451	0.387746	0.375484	0.310237	0.348526	0.394579	0.327592	0.382147	0.338233	0.389152
70.9562	-40.5246	0.402957	0.325239	0.398182	0.322877	0.30219	0.331593	0.394623	0.27167	0.323899	0.392626	0.373139	0.310141	0.345846	0.392526	0.33145	0.383397	0.335023	0.389141
70.9506	-40.5338	0.402962	0.325242	0.398189	0.322883	0.302197	0.316103	0.401187	0.288035	0.29881	0.412524	0.366342	0.305703	0.353428	0.374935	0.336471	0.387082	0.328571	0.390593
70.9469	-40.5398	0.402966	0.325245	0.398196	0.32289	0.302203	0.305793	0.400888	0.304399	0.28628	0.422468	0.361814	0.305608	0.358541	0.361319	0.336324	0.390764	0.326936	0.392063
70.9412	-40.5489	0.402971	0.325248	0.398204	0.322896	0.30221	0.3058	0.37996	0.328909	0.280023	0.437609	0.352914	0.307656	0.366297	0.347776	0.332288	0.394427	0.328505	0.396535
70.9375	-40.5549	0.402976	0.32525	0.398211	0.322903	0.302216	0.310964	0.373136	0.328916	0.292561	0.437867	0.350809	0.309857	0.371596	0.344022	0.328403	0.394415	0.330104	0.399533
70.9318	-40.564	0.402981	0.325253	0.398218	0.322909	0.302223	0.326462	0.352621	0.328924	0.317661	0.438361	0.351126	0.31436	0.377088	0.348178	0.323373	0.389467	0.336543	0.399573
70.9281	-40.57	0.402985	0.33366	0.386211	0.322916	0.302229	0.341976	0.332081	0.328932	0.330224	0.438615	0.353558	0.316668	0.377284	0.354156	0.323519	0.387053	0.338191	0.398113
70.9225	-40.5791	0.40299	0.346303	0.368155	0.322922	0.313115	0.347595	0.304648	0.32894	0.342799	0.428666	0.358108	0.318925	0.372221	0.358091	0.331455	0.387189	0.338264	0.392175
70.9187	-40.5851	0.402995	0.346306	0.368162	0.344631	0.313428	0.347886	0.29092	0.328947	0.336522	0.423462	0.362501	0.314635	0.369531	0.357997	0.334021	0.392225	0.336683	0.38919
70.9131	-40.5941	0.403	0.346309	0.368169	0.377256	0.302975	0.35827	0.277175	0.328955	0.31769	0.423124	0.369081	0.3082	0.364195	0.357837	0.327362	0.40343	0.331859	0.390667
70.9075	-40.6032	0.403004	0.346312	0.368176	0.377264	0.310249	0.348195	0.28416	0.320799	0.311424	0.433196	0.371441	0.308307	0.359088	0.355895	0.324722	0.399603	0.335027	0.396639
70.9037	-40.6092	0.403009	0.346315	0.368183	0.377271	0.317532	0.338106	0.298134	0.304464	0.311431	0.443392	0.371612	0.308413	0.359183	0.355966	0.332635	0.388377	0.339838	0.398152
70.8981	-40.6182	0.403014	0.346318	0.36819	0.377279	0.321181	0.33306	0.312123	0.28811	0.32399	0.438553	0.369428	0.306271	0.374765	0.356135	0.345867	0.375978	0.346304	0.399707
70.8943	-40.6242	0.403018	0.346321	0.368196	0.377287	0.321188	0.333068	0.312131	0.288116	0.336561	0.418415	0.369274	0.306177	0.385094	0.358154	0.34331	0.381043	0.346345	0.399739
70.8887	-40.6333	0.403023	0.346324	0.368203	0.409948	0.310724	0.333075	0.312138	0.288123	0.355426	0.408572	0.36255	0.30823	0.387657	0.365956	0.330272	0.397365	0.339976	0.39676
70.8849	-40.6393	0.403028	0.346327	0.36821	0.431768	0.31102	0.322976	0.319136	0.27995	0.368016	0.419004	0.356055	0.306139	0.382455	0.373691	0.327691	0.402417	0.335189	0.398267
70.8793	-40.6483	0.403033	0.34633	0.368217	0.431777	0.32197	0.307796	0.340138	0.280238	0.368371	0.419363	0.356292	0.306294	0.366979	0.385289	0.334319	0.396228	0.338427	0.401296
70.8755	-40.6543	0.403037	0.346333	0.368224	0.431785	0.321977	0.307804	0.347152	0.288634	0.368606	0.409385	0.363121	0.308599	0.35675	0.387245	0.340908	0.388743	0.346462	0.402827
70.8699	-40.6634	0.403042	0.346336	0.368231	0.431794	0.321984	0.307811	0.34716	0.28864	0.374919	0.404397	0.369955	0.313054	0.343953	0.39115	0.343581	0.383752	0.352891	0.404351
70.8661	-40.6694	0.403047	0.346339	0.368237	0.431803	0.321991	0.307818	0.347169	0.288647	0.374928	0.404406	0.369963	0.317362	0.341438	0.393141	0.340999	0.38628	0.349695	0.404353
70.8605	-40.6785	0.403052	0.346342	0.368244	0.431812	0.321999	0.307825	0.347177	0.313545	0.356366	0.404415	0.369971	0.321671	0.344132	0.395204	0.33583	0.391334	0.344907	0.402861
70.8567	-40.6845	0.403056	0.346345	0.368251	0.431821	0.322006	0.307832	0.347185	0.330168	0.343977	0.404425	0.372254	0.323881	0.346828	0.395317	0.331952	0.393862	0.346531	0.399881
70.851	-40.6935	0.403061	0.346348	0.368258	0.431829	0.322013	0.307839	0.347193	0.338482	0.337788	0.409539	0.376897	0.321889	0.354739	0.391595	0.328073	0.398916	0.351384	0.396923
70.8454	-40.7025	0.403066	0.346351	0.368265	0.431838	0.32202	0.318229	0.333444	0.363435	0.319182	0.424876	0.379425	0.31779	0.362656	0.387869	0.328135	0.402751	0.354646	0.393969
70.8416	-40.7085	0.403071	0.346354	0.368271	0.431847	0.322027	0.328631	0.319678	0.371767	0.32559	0.425117	0.379595	0.317895	0.362749	0.384038	0.332081	0.404061	0.354679	0.392493
70.8359	-40.7175	0.403075	0.337924	0.38033	0.431856	0.322034	0.33384	0.312792	0.371775	0.344536	0.425465	0.373002	0.320056	0.368017	0.372428	0.341224	0.407911	0.346694	0.395505
70.8321	-40.7236	0.40308	0.329512	0.392366	0.431865	0.322041	0.333848	0.312799	0.371784	0.344544	0.440832	0.361843	0.326426	0.370678	0.364689	0.347759	0.409221	0.337078	0.401495
70.8264	-40.7326	0.403085	0.325314	0.39838	0.431873	0.318397	0.338922	0.312807	0.371793	0.3635	0.446322	0.355312	0.330795	0.365594	0.362773	0.354335	0.409296	0.324253	0.41048
70.8226	-40.7386	0.403089	0.325317	0.398387	0.442789	0.307611	0.349053	0.312814	0.371802	0.376155	0.446564	0.364595	0.320326	0.363032	0.372541	0.353128	0.408092	0.322667	0.410493
70.8169	-40.7476	0.403094	0.32532	0.398394	0.47557	0.289821	0.359171	0.312821	0.355166	0.388582	0.456836	0.378462	0.303463	0.363038	0.390127	0.348054	0.403109	0.333931	0.403039
70.8131	-40.7536	0.403099	0.325323	0.398402	0.48652	0.279032	0.369286	0.312829	0.338546	0.400997	0.456847	0.37847	0.303469	0.363044	0.395995	0.346802	0.399348	0.346789	0.395578
70.8075	-40.7626	0.403104	0.316924	0.410423	0.475589	0.271637	0.368834	0.333507	0.330246	0.407204	0.446594	0.369186	0.316128	0.36305	0.388184	0.353303	0.390517	0.366045	0.39111
70.8037	-40.7686	0.403108	0.308544	0.422423	0.453742	0.275017	0.358312	0.354155	0.330253	0.394567	0.446372	0.36904	0.318191	0.363013	0.380342	0.35978	0.381674	0.374034	0.397102
70.798	-40.7776	0.403113	0.304362	0.440907	0.399648	0.274629	0.357875	0.374781	0.330261	0.375627	0.440902	0.375583	0.311681	0.362847	0.380215	0.3597	0.374043	0.381996	0.409078
70.7942	-40.7836	0.403118	0.304364	0.453423	0.356452	0.278001	0.357735	0.381654	0.330269	0.363006	0.430443	0.377554	0.309387	0.362679	0.385943	0.354423	0.372717	0.389988	0.409074
70.7885	-40.7926	0.403123	0.304367	0.459694	0.323974	0.28499	0.357743	0.388669	0.338701	0.331687	0.424992	0.370406	0.309051	0.367594	0.391632	0.342555	0.375102	0.402776	0.397069
70.7829	-40.8015	0.403127	0.304369	0.478493	0.291828	0.284996	0.368115	0.395983	0.347376	0.306856	0.40967	0.367901	0.30886	0.37524	0.379893	0.337163	0.382531	0.394697	0.391017
70.7791	-40.8074	0.403132	0.304372	0.491055	0.270354	0.292258	0.37362	0.38239	0.355826	0.307048	0.394575	0.374658	0.306813	0.377899	0.364356	0.340985	0.386279	0.377019	0.393958
70.7735	-40.8163	0.403137	0.304374	0.509905	0.27079	0.296324	0.384644	0.36214	0.372879	0.313842	0.374762	0.383941	0.309264	0.375619	0.348947	0.344888	0.395135	0.356192	0.395432
70.7698	-40.8223	0.403142	0.304377	0.528793	0.271224	0.29311	0.39539	0.348604	0.381483	0.320459	0.375167	0.386556	0.315979	0.36554	0.354929	0.34241	0.401524	0.35627	0.38799
70.7642	-40.8311	0.403146	0.304379	0.547709	0.271657	0.289891	0.406154	0.342063	0.381871	0.320757	0.406211	0.385012	0.320693	0.355522	0.3727	0.340086	0.40803	0.367662	0.368621
70.7604	-40.837	0.403151	0.304382	0.554032	0.271804	0.286387	0.411386	0.356281	0.365521	0.314521	0.426745	0.383052	0.320846	0.353038	0.382542	0.344172	0.409438	0.374181	0.353692
70.7549	-40.8458	0.403156	0.304384	0.554042	0.238999	0.296915	0.395737	0.398193	0.332412	0.295437	0.44683	0.38306	0.314374	0.358147	0.386424	0.35472	0.409566	0.377467	0.331237
70.7511	-40.8517	0.403161	0.304387	0.554052	0.217172	0.303922	0.374899	0.432885	0.307438	0.282627	0.456621	0.382909	0.30781	0.365778	0.382454	0.357274	0.41207	0.377469	0.325237
70.7455	-40.8605	0.403165	0.30439	0.554063	0.217176	0.303929	0.359295	0.453582	0.290739	0.28878	0.461638	0.380632	0.301298	0.370834	0.382393	0.351976	0.415782	0.377449	0.329726
70.7418	-40.8663	0.40317	0.304392	0.554073	0.228093	0.30408	0.35945	0.460813	0.274228	0.301428	0.467023	0.378591	0.301396	0.368316	0.388294	0.345483	0.418299	0.374241	0.334224
70.7362	-40.8751	0.409919	0.296177	0.573026	0.228464	0.304517	0.370316	0.447516	0.274492	0.314371	0.46251	0.381197	0.310268	0.355641	0.396254	0.340381	0.422152	0.369467	0.335743
70.7325	-40.881	0.416691	0.287962	0.58569	0.217757	0.304667	0.391353	0.412946	0.291231	0.314565	0.45762	0.383572	0.319011	0.348049	0.398317	0.341777	0.422226	0.369505	0.334266
70.7269	-40.8898	0.420087	0.28803	0.579714	0.217762	0.304673	0.412281	0.364032	0.316048	0.314572	0.45763	0.38358	0.325502	0.353405	0.396534	0.343174	0.424828	0.372775	0.326802
70.7213	-40.8986	0.42009	0.300581	0.549076	0.239426	0.30468	0.396601	0.370719	0.332574	0.31458	0.4525	0.378933	0.327524	0.363791	0.398563	0.344551	0.427417	0.376038	0.320833
70.7175	-40.9045	0.420093	0.304775	0.530442	0.261056	0.301033	0.380788	0.398412	0.332582	0.314587	0.442235	0.378787	0.331752	0.363797	0.398569	0.347188	0.427448	0.380883	0.317853
70.7119	-40.9134	0.420097	0.304778	0.524141	0.282802	0.286585	0.380338	0.419152	0.332589	0.314594	0.43711	0.38329	0.329648	0.363803	0.398574	0.351141	0.424963	0.387331	0.317874
70.7081	-40.9193	0.4201	0.304781	0.524151	0.304717	0.275921	0.385402	0.419162	0.332597	0.314602	0.447392	0.383455	0.32543	0.366425	0.396656	0.356412	0.422491	0.384128	0.323878
70.7024	-40.9282	0.420103	0.304783	0.524161	0.326665	0.26889	0.385411	0.419172	0.332605	0.314609	0.457682	0.390488	0.314869	0.379515	0.387041	0.360367	0.425065	0.372897	0.334378
70.6986	-40.9342	0.420107	0.304786	0.524171	0.34862	0.254565	0.400743	0.412275	0.332613	0.314616	0.457692	0.395078	0.310644	0.387375	0.379312	0.361668	0.427599	0.363254	0.343368
70.6929	-40.9431	0.42011	0.304788	0.52418	0.381611	0.233071	0.431546	0.391539	0.33262	0.314624	0.447422	0.394925	0.312718	0.379484	0.381148	0.362929	0.426309	0.351969	0.358334
70.6891	-40.949	0.420113	0.304791	0.52419	0.381619	0.233076	0.442	0.377704	0.332628	0.314631	0.437159	0.394772	0.312629	0.368939	0.386829	0.361555	0.422462	0.353534	0.36131
70.6834	-40.958	0.420117	0.304794	0.530511	0.370826	0.244001	0.442551	0.356926	0.332636	0.314638	0.432035	0.3947	0.310428	0.355786	0.394427	0.356233	0.418574	0.363123	0.355291
70.6796	-40.9639	0.42012	0.304796	0.543159	0.327208	0.258355	0.437684	0.349998	0.349381	0.302156	0.432045	0.394708	0.310433	0.350564	0.398275	0.353605	0.417285	0.371149	0.3523
70.6739	-40.9729	0.420123	0.313185	0.543806	0.272613	0.27257	0.432639	0.357064	0.366266	0.289743	0.432168	0.394797	0.310486	0.353224	0.398349	0.356281	0.413549	0.382423	0.353837
70.6701	-40.9788	0.420127	0.321592	0.531774	0.272619	0.279873	0.422529	0.371199	0.358124	0.296179	0.437539	0.392758	0.310585	0.355927	0.398456	0.357661	0.414871	0.384071	0.356866
70.6644	-40.9877	0.42013	0.325804	0.525754	0.283596	0.287321	0.407338	0.39242	0.358475	0.296447	0.458471	0.386445	0.308614	0.361287	0.398629	0.357763	0.421267	0.374487	0.36439
70.6585	-40.9968	0.420133	0.325807	0.525764	0.316568	0.287728	0.392126	0.41366	0.342034	0.309244	0.463992	0.384468	0.31092	0.366694	0.394919	0.352576	0.42127	0.36805	0.371879
70.6547	-41.0028	0.420137	0.325809	0.525774	0.327579	0.287868	0.387055	0.420754	0.333751	0.328321	0.443737	0.386693	0.317418	0.369443	0.38918	0.348648	0.418716	0.366415	0.374859
70.649	-41.0116	0.42014	0.325812	0.525784	0.327586	0.287874	0.387064	0.420764	0.333759	0.347418	0.413166	0.393346	0.321754	0.374771	0.381479	0.348651	0.416189	0.363184	0.367338
70.6452	-41.0175	0.420144	0.325815	0.525794	0.327593	0.284218	0.392153	0.420773	0.333767	0.347426	0.408028	0.393274	0.323878	0.377398	0.379557	0.352606	0.416232	0.361597	0.356842
70.6395	-41.0264	0.420147	0.325818	0.525804	0.294607	0.283831	0.407385	0.399539	0.341845	0.359962	0.408037	0.386405	0.323739	0.379897	0.383416	0.361831	0.420124	0.360056	0.341873
70.6357	-41.0323	0.42015	0.325821	0.525814	0.272659	0.287224	0.412461	0.385404	0.341631	0.372486	0.413194	0.381908	0.321534	0.379817	0.387274	0.365788	0.426495	0.36011	0.337405
70.63	-41.0412	0.420154	0.325824	0.525824	0.272665	0.28723	0.412471	0.385413	0.333258	0.378748	0.428658	0.377561	0.323751	0.372051	0.397039	0.361918	0.43917	0.358573	0.338947
70.6262	-41.0471	0.420157	0.325827	0.525834	0.27267	0.287237	0.422949	0.371547	0.333266	0.378756	0.444132	0.380087	0.32395	0.369603	0.401061	0.356747	0.44425	0.358607	0.343472
70.6206	-41.056	0.42016	0.338466	0.526749	0.240152	0.294552	0.428546	0.350712	0.333274	0.378765	0.464778	0.39188	0.322214	0.372558	0.399398	0.358219	0.43678	0.371511	0.343518
70.6168	-41.0619	0.420164	0.346916	0.52736	0.218431	0.301878	0.418404	0.35072	0.333281	0.378774	0.475113	0.39664	0.324573	0.372769	0.401524	0.363611	0.426784	0.387632	0.333055
70.611	-41.0707	0.420167	0.346919	0.52737	0.218435	0.305547	0.413332	0.3578	0.325014	0.385147	0.480412	0.394504	0.333305	0.362479	0.415292	0.365084	0.418035	0.419865	0.303101
70.6053	-41.0796	0.42017	0.346922	0.514685	0.240167	0.305554	0.418585	0.372097	0.300168	0.404264	0.46528	0.387616	0.346188	0.34948	0.427004	0.359883	0.418038	0.429534	0.283599
70.6015	-41.0855	0.420174	0.346925	0.502018	0.261865	0.305561	0.429089	0.365282	0.291882	0.410649	0.460238	0.385326	0.350485	0.354771	0.421224	0.357248	0.423082	0.419884	0.283587
70.5958	-41.0943	0.420177	0.346928	0.495697	0.294663	0.298526	0.439605	0.372627	0.267006	0.429784	0.455423	0.385485	0.34625	0.367904	0.41158	0.355932	0.430672	0.411866	0.289595
70.592	-41.1001	0.42018	0.346931	0.495706	0.31666	0.291481	0.439615	0.38683	0.250401	0.44894	0.4506	0.387943	0.342062	0.367949	0.409654	0.359894	0.433247	0.415125	0.292622
70.5863	-41.1088	0.420184	0.346934	0.508383	0.339032	0.281025	0.434547	0.408136	0.225481	0.468109	0.456119	0.390553	0.337965	0.360193	0.411622	0.369153	0.434619	0.413577	0.295652
70.5825	-41.1146	0.420187	0.346938	0.52108	0.350422	0.277749	0.424389	0.422362	0.208846	0.487293	0.461646	0.388559	0.340285	0.357724	0.411724	0.374493	0.433443	0.402338	0.298653
70.5767	-41.1234	0.42019	0.346941	0.540141	0.350968	0.274468	0.429985	0.422806	0.200656	0.493987	0.477549	0.386706	0.347054	0.368546	0.404252	0.378608	0.429779	0.395945	0.292659
70.5729	-41.1292	0.420194	0.346944	0.552871	0.34027	0.274596	0.435431	0.423104	0.200783	0.481477	0.48794	0.38686	0.351508	0.376599	0.406433	0.376118	0.426051	0.405636	0.285178
70.5672	-41.138	0.420197	0.359634	0.541091	0.32938	0.285627	0.42015	0.423114	0.209189	0.475223	0.48276	0.389101	0.355868	0.376683	0.420262	0.373641	0.418529	0.426599	0.28522
70.5634	-41.1439	0.413441	0.376429	0.528969	0.307266	0.296407	0.415056	0.423124	0.209194	0.475234	0.472394	0.391267	0.355826	0.374019	0.426103	0.374984	0.413484	0.437872	0.289742
70.5577	-41.1528	0.403351	0.388902	0.522611	0.285051	0.314391	0.404859	0.408893	0.234266	0.449786	0.477249	0.388821	0.355685	0.366017	0.429849	0.374916	0.410905	0.442668	0.294241
70.5539	-41.1587	0.410079	0.380593	0.509899	0.306828	0.321765	0.394648	0.394675	0.267731	0.424474	0.487391	0.386525	0.351291	0.36328	0.425794	0.376132	0.410851	0.439411	0.297226
70.5482	-41.1676	0.42021	0.368127	0.497206	0.328572	0.325459	0.379011	0.40153	0.292881	0.411934	0.487402	0.386533	0.344773	0.3658	0.411983	0.378611	0.408237	0.434515	0.303198
70.5425	-41.1765	0.420214	0.36813	0.497216	0.3617	0.314847	0.363246	0.422441	0.292888	0.411943	0.487413	0.386541	0.344779	0.365806	0.402168	0.377201	0.406903	0.432855	0.301672
70.5386	-41.1824	0.420217	0.368134	0.497225	0.383829	0.30776	0.363255	0.429559	0.284575	0.418344	0.482358	0.388852	0.347008	0.36063	0.402173	0.374564	0.405615	0.429613	0.301657
70.5329	-41.1912	0.420221	0.368137	0.509938	0.395303	0.297119	0.363263	0.450916	0.259597	0.437545	0.46716	0.395775	0.347159	0.352859	0.410035	0.36804	0.404339	0.424767	0.300139
70.5291	-41.1971	0.420224	0.368141	0.522671	0.395716	0.290014	0.363271	0.458049	0.251266	0.443957	0.462096	0.398089	0.345036	0.358123	0.412068	0.364137	0.404342	0.421546	0.298632
70.5233	-41.2059	0.420227	0.368144	0.52905	0.384825	0.278962	0.378619	0.45806	0.251271	0.443968	0.446551	0.404787	0.345043	0.366019	0.410202	0.361535	0.404344	0.418325	0.295623
70.5195	-41.2118	0.420231	0.368147	0.52906	0.384834	0.267927	0.393943	0.458071	0.23445	0.456529	0.4362	0.406944	0.342825	0.368579	0.408211	0.362823	0.404336	0.419932	0.29262
70.5137	-41.2205	0.420234	0.368151	0.522701	0.395741	0.256904	0.409249	0.436722	0.234244	0.475343	0.436209	0.400038	0.33834	0.371021	0.406128	0.362737	0.40428	0.427954	0.292621
70.5099	-41.2264	0.423614	0.364008	0.509987	0.417523	0.253238	0.41435	0.42251	0.234093	0.475083	0.446368	0.395438	0.338252	0.36832	0.408004	0.361384	0.404247	0.432768	0.294124
70.5042	-41.2352	0.433781	0.351572	0.497292	0.439271	0.256916	0.409267	0.42252	0.217312	0.468431	0.466763	0.388611	0.344684	0.360481	0.40991	0.36269	0.405516	0.432777	0.300136
70.5003	-41.2411	0.4371	0.347429	0.497302	0.461464	0.260831	0.393985	0.436753	0.225849	0.449662	0.477138	0.386464	0.351262	0.350124	0.413843	0.36405	0.408089	0.429593	0.304652
70.4945	-41.2499	0.437102	0.347432	0.516377	0.462188	0.268562	0.368447	0.479496	0.234694	0.405767	0.492706	0.395913	0.351611	0.347751	0.41404	0.365482	0.413243	0.42645	0.309189
70.4907	-41.2558	0.437105	0.347436	0.529121	0.440407	0.268568	0.378971	0.494109	0.226571	0.386924	0.503092	0.405302	0.343193	0.360983	0.408368	0.366878	0.413305	0.426487	0.309206
70.485	-41.2646	0.437107	0.347439	0.522762	0.406867	0.253373	0.435629	0.46605	0.234937	0.386933	0.518676	0.405539	0.323737	0.389711	0.410491	0.364347	0.409552	0.423272	0.306199
70.4792	-41.2735	0.437109	0.347442	0.50369	0.361978	0.256249	0.466152	0.401914	0.284758	0.412183	0.534398	0.375829	0.319	0.397156	0.42401	0.359049	0.409497	0.418405	0.30317
70.4754	-41.2794	0.437111	0.347445	0.497349	0.339711	0.27788	0.450916	0.366379	0.32636	0.424988	0.555464	0.341657	0.32729	0.386439	0.427653	0.360251	0.410696	0.418373	0.300151
70.4696	-41.2882	0.433796	0.351595	0.516426	0.340232	0.300346	0.420839	0.373863	0.326793	0.42548	0.587276	0.321529	0.331689	0.373428	0.413846	0.369335	0.408141	0.419958	0.300143
70.4658	-41.2941	0.427022	0.359891	0.541911	0.340939	0.297212	0.416053	0.416881	0.285401	0.419436	0.592785	0.342481	0.327899	0.371196	0.400385	0.373336	0.404401	0.423197	0.301659
70.4601	-41.3029	0.420271	0.368188	0.561067	0.308179	0.286158	0.431404	0.452604	0.252047	0.438803	0.551611	0.381535	0.330656	0.377003	0.393	0.37356	0.400739	0.426485	0.306201
70.4562	-41.3088	0.420274	0.368191	0.561078	0.286033	0.285906	0.441624	0.431185	0.26026	0.470658	0.499888	0.390298	0.345789	0.377161	0.402955	0.368438	0.404601	0.42493	0.310731
70.4505	-41.3175	0.416902	0.372352	0.561089	0.319267	0.282619	0.431424	0.395539	0.293565	0.496228	0.448205	0.387492	0.358491	0.363919	0.422422	0.36585	0.414758	0.424993	0.313766
70.4466	-41.3233	0.410171	0.380669	0.561099	0.363683	0.283128	0.410983	0.402675	0.31053	0.4838	0.453517	0.385336	0.354187	0.35599	0.4223	0.372392	0.417308	0.428239	0.31228
70.4408	-41.3319	0.403465	0.388987	0.56111	0.38593	0.290781	0.379938	0.459486	0.302662	0.452309	0.500393	0.383668	0.348032	0.364076	0.412719	0.380379	0.411073	0.42988	0.310794
70.437	-41.3376	0.40347	0.397502	0.548979	0.385938	0.28709	0.374532	0.487758	0.28594	0.452319	0.51605	0.386199	0.350404	0.374809	0.412993	0.381866	0.404845	0.42669	0.309302
70.4312	-41.3463	0.403474	0.410306	0.511585	0.385368	0.286714	0.384642	0.480455	0.268882	0.471106	0.505514	0.390623	0.35691	0.385441	0.419084	0.384673	0.404965	0.421926	0.306321
70.4274	-41.3521	0.403479	0.41031	0.498853	0.362801	0.297264	0.384497	0.473169	0.260288	0.477145	0.494871	0.392657	0.352411	0.393168	0.419029	0.387287	0.41258	0.420354	0.309343
70.4216	-41.3609	0.403484	0.410313	0.498863	0.329589	0.307924	0.368714	0.486969	0.251784	0.47689	0.489443	0.390137	0.34133	0.392817	0.416796	0.381822	0.431457	0.415524	0.316851
70.4159	-41.3697	0.403489	0.410317	0.505241	0.329762	0.315453	0.348104	0.515359	0.260456	0.451741	0.499863	0.387978	0.334845	0.379574	0.420522	0.36984	0.438905	0.415475	0.321336
70.412	-41.3756	0.403494	0.410321	0.524379	0.319192	0.32314	0.338116	0.522873	0.269155	0.439391	0.505321	0.392824	0.335076	0.37977	0.418715	0.364626	0.435104	0.418683	0.328847
70.4063	-41.3844	0.406849	0.406156	0.556355	0.319984	0.316461	0.343783	0.51643	0.286328	0.440005	0.516355	0.400282	0.33989	0.390783	0.415261	0.364866	0.42766	0.418736	0.333382
70.4025	-41.3903	0.413571	0.397822	0.556366	0.342235	0.301928	0.364615	0.509632	0.294889	0.440253	0.521831	0.398187	0.344354	0.393582	0.419351	0.367631	0.423957	0.415549	0.327384
70.3967	-41.3991	0.420315	0.389488	0.530798	0.386018	0.279752	0.421791	0.460352	0.286256	0.459208	0.495742	0.395521	0.339723	0.393281	0.42897	0.364939	0.426442	0.41392	0.316853
70.3928	-41.4049	0.427063	0.381174	0.511665	0.407661	0.268568	0.463416	0.410875	0.277553	0.471578	0.469462	0.39734	0.332919	0.392934	0.428699	0.363471	0.428867	0.415485	0.316833
70.3871	-41.4137	0.43715	0.368701	0.49893	0.396147	0.271894	0.489526	0.361253	0.260336	0.477232	0.458523	0.399146	0.339192	0.384918	0.422614	0.369931	0.418678	0.417022	0.32882
70.3832	-41.4195	0.437152	0.368705	0.511684	0.341062	0.289945	0.479319	0.354124	0.25183	0.464134	0.484095	0.399228	0.352323	0.372019	0.420713	0.37524	0.408591	0.41378	0.340825
70.3774	-41.4282	0.437155	0.368708	0.530848	0.275062	0.319057	0.453742	0.368411	0.243557	0.432194	0.535672	0.399677	0.356979	0.367042	0.424838	0.378029	0.40236	0.402529	0.355846
70.3735	-41.434	0.437157	0.368712	0.530858	0.275068	0.32276	0.443329	0.39688	0.243782	0.400501	0.545843	0.401999	0.346118	0.380087	0.430782	0.379424	0.403685	0.394506	0.361861
70.3677	-41.4427	0.437159	0.368715	0.530868	0.297219	0.304587	0.442831	0.453709	0.252618	0.362684	0.540648	0.397307	0.330723	0.398157	0.438572	0.387383	0.407568	0.386505	0.363383
70.3639	-41.4485	0.433844	0.372878	0.530879	0.319403	0.297482	0.432266	0.489229	0.252852	0.36299	0.551462	0.390735	0.332996	0.39565	0.436671	0.394021	0.411441	0.381721	0.363405
70.358	-41.4573	0.423709	0.385358	0.550063	0.331008	0.301718	0.390801	0.524584	0.25301	0.401731	0.552522	0.395939	0.348729	0.377841	0.431073	0.39812	0.416625	0.380189	0.35744
70.3522	-41.466	0.420345	0.389521	0.56288	0.364737	0.29499	0.370121	0.531589	0.236075	0.452989	0.553291	0.396373	0.357755	0.375564	0.435291	0.390371	0.417949	0.39474	0.331938
70.3484	-41.4718	0.420348	0.389524	0.556485	0.39801	0.276735	0.385541	0.51726	0.235944	0.465623	0.553303	0.394061	0.359902	0.380853	0.439301	0.381171	0.417921	0.410856	0.310916
70.3425	-41.4806	0.413618	0.397867	0.537307	0.430859	0.258265	0.411176	0.474308	0.277787	0.452635	0.526819	0.393505	0.363907	0.38328	0.437183	0.378428	0.417839	0.405971	0.315395
70.3387	-41.4864	0.406912	0.406209	0.53093	0.441798	0.261963	0.411343	0.460173	0.294622	0.446337	0.51118	0.3933	0.365955	0.383211	0.433186	0.381011	0.416552	0.391439	0.336399
70.3329	-41.4952	0.40357	0.410382	0.550116	0.408992	0.291562	0.386158	0.474961	0.312017	0.434318	0.485686	0.411838	0.372901	0.370416	0.433372	0.383764	0.411561	0.388239	0.351436
70.329	-41.501	0.403575	0.410386	0.575746	0.365153	0.30641	0.381449	0.489789	0.312505	0.434903	0.460151	0.43504	0.375574	0.365513	0.435617	0.386583	0.405339	0.391506	0.35297
70.3232	-41.5097	0.403579	0.41039	0.595009	0.332207	0.310131	0.392197	0.497471	0.295878	0.448059	0.45535	0.4469	0.369381	0.38156	0.43989	0.389449	0.399138	0.398016	0.35001
70.3194	-41.5155	0.403584	0.410393	0.595021	0.332214	0.302712	0.413106	0.469072	0.304205	0.454408	0.476257	0.43328	0.362722	0.394618	0.439895	0.389453	0.40168	0.404482	0.344016
70.3136	-41.5242	0.403589	0.410397	0.595033	0.332221	0.291597	0.449766	0.397911	0.329117	0.454051	0.507305	0.407965	0.357988	0.399541	0.43572	0.386642	0.410455	0.415749	0.3335
70.3097	-41.53	0.403594	0.410401	0.595044	0.332228	0.291603	0.460397	0.369513	0.337409	0.44749	0.522765	0.398763	0.360044	0.394185	0.433635	0.383914	0.415465	0.415733	0.334995
70.3039	-41.5386	0.403599	0.418951	0.582872	0.332236	0.295315	0.465902	0.369755	0.346109	0.434957	0.543825	0.396799	0.371176	0.373372	0.439587	0.378685	0.419276	0.406072	0.348517
70.3001	-41.5444	0.410298	0.419161	0.570678	0.332243	0.302739	0.455626	0.391277	0.354929	0.435423	0.549576	0.397153	0.377991	0.363071	0.44958	0.376183	0.416811	0.407715	0.35004
70.2943	-41.553	0.420385	0.410906	0.564578	0.33225	0.310173	0.445335	0.427188	0.338442	0.448715	0.53971	0.402017	0.378232	0.360596	0.459579	0.380304	0.408043	0.420654	0.335046
70.2886	-41.5617	0.420389	0.410909	0.564589	0.332257	0.31018	0.429399	0.477095	0.304785	0.422867	0.534001	0.406326	0.367139	0.370917	0.457488	0.389507	0.405524	0.423883	0.318514
70.2847	-41.5674	0.420392	0.415189	0.558491	0.332264	0.310186	0.413481	0.505409	0.279349	0.409749	0.538764	0.403798	0.356014	0.383826	0.449476	0.39468	0.408028	0.415805	0.316992
70.2789	-41.5761	0.420396	0.428045	0.540143	0.332271	0.310193	0.397578	0.504924	0.279118	0.42878	0.549245	0.394656	0.349367	0.39422	0.435639	0.394549	0.416841	0.402893	0.322981
70.2751	-41.5818	0.420399	0.432342	0.540445	0.321288	0.317628	0.381982	0.497586	0.295947	0.454613	0.560235	0.388103	0.353883	0.391768	0.435761	0.387997	0.421913	0.399685	0.330501
70.2693	-41.5905	0.427133	0.411129	0.578123	0.32176	0.318058	0.366507	0.497598	0.31295	0.480736	0.576758	0.386379	0.367392	0.381695	0.447905	0.37898	0.418197	0.40456	0.342556
70.2654	-41.5962	0.433888	0.394244	0.596796	0.355477	0.303722	0.377117	0.483563	0.329969	0.481	0.57177	0.391108	0.378502	0.371384	0.45198	0.384379	0.409406	0.409419	0.347086
70.2596	-41.6048	0.437207	0.390076	0.596808	0.389098	0.289226	0.403524	0.45544	0.338489	0.481138	0.535138	0.402349	0.385045	0.368807	0.452014	0.395006	0.399329	0.412654	0.351606
70.2557	-41.6106	0.433893	0.38572	0.596162	0.411145	0.281793	0.424477	0.44137	0.338497	0.4682	0.540166	0.399961	0.38057	0.371325	0.457859	0.392358	0.399313	0.412645	0.353105
70.2499	-41.6193	0.423777	0.376924	0.607364	0.421733	0.281559	0.445428	0.398543	0.346614	0.454913	0.571047	0.393057	0.362943	0.373637	0.471419	0.383048	0.403042	0.410999	0.353085
70.246	-41.6251	0.420419	0.368331	0.619191	0.410352	0.288745	0.445438	0.369858	0.346205	0.467358	0.555062	0.397378	0.354054	0.373397	0.475155	0.380322	0.406788	0.407751	0.351564
70.2402	-41.6339	0.420423	0.351385	0.624217	0.398583	0.291952	0.460898	0.33404	0.345695	0.473194	0.528395	0.40373	0.351605	0.367873	0.468951	0.380135	0.415562	0.404498	0.342523
70.2363	-41.6397	0.413705	0.355453	0.623877	0.387237	0.284287	0.470839	0.333837	0.345492	0.472952	0.522936	0.403524	0.353665	0.37045	0.457087	0.38135	0.420582	0.404488	0.338008
70.2305	-41.6484	0.40367	0.372136	0.624241	0.3986	0.273431	0.460054	0.369278	0.328753	0.485865	0.528418	0.392136	0.366708	0.375882	0.443467	0.383987	0.423135	0.40128	0.342522
70.2247	-41.657	0.393663	0.401642	0.619239	0.399206	0.292349	0.418919	0.426626	0.30407	0.480073	0.544629	0.38333	0.375613	0.381425	0.437819	0.386738	0.416869	0.401298	0.353056
70.2208	-41.6628	0.387023	0.422804	0.607435	0.365849	0.310686	0.403451	0.455371	0.304429	0.467661	0.550134	0.385859	0.378	0.376316	0.431988	0.386741	0.416872	0.398073	0.362071
70.2149	-41.6715	0.387029	0.444238	0.557713	0.343017	0.310002	0.429244	0.441007	0.355283	0.455228	0.529403	0.397357	0.371571	0.368384	0.425986	0.383997	0.420603	0.391593	0.375574
70.211	-41.6772	0.387035	0.457139	0.513757	0.342332	0.305761	0.449654	0.412168	0.422826	0.429718	0.508332	0.401666	0.362677	0.36815	0.427764	0.387876	0.415495	0.38833	0.384565
70.2053	-41.6858	0.397008	0.457475	0.476212	0.330728	0.30892	0.449144	0.390302	0.498678	0.39126	0.492304	0.382676	0.370795	0.367807	0.435363	0.395724	0.400262	0.386652	0.387526
70.2015	-41.6915	0.413717	0.440812	0.470087	0.341839	0.309066	0.438724	0.390181	0.498535	0.391169	0.492203	0.366394	0.383529	0.365101	0.441193	0.401025	0.388878	0.385012	0.381493
70.1958	-41.6999	0.443723	0.403154	0.489287	0.35349	0.313332	0.418341	0.397478	0.45625	0.416704	0.508025	0.368981	0.38816	0.354782	0.445235	0.40774	0.378816	0.373735	0.376967
70.192	-41.7054	0.453475	0.390626	0.514935	0.343054	0.31747	0.408359	0.404915	0.422607	0.448918	0.513741	0.380921	0.382091	0.355018	0.44348	0.407848	0.378874	0.364092	0.382981
70.1865	-41.7136	0.446979	0.398978	0.547065	0.31041	0.325196	0.403664	0.412501	0.372018	0.500474	0.50919	0.397537	0.365129	0.365736	0.445697	0.401378	0.383992	0.357683	0.398028
70.1828	-41.719	0.437234	0.402953	0.572207	0.288386	0.325203	0.414302	0.405604	0.346614	0.506692	0.519585	0.402267	0.354309	0.370964	0.451626	0.393477	0.386507	0.364132	0.404053
70.1773	-41.7271	0.423824	0.406828	0.590565	0.277228	0.317633	0.44043	0.377152	0.337922	0.461021	0.549885	0.401999	0.347568	0.37866	0.45151	0.381488	0.387659	0.388264	0.395046
70.1736	-41.7325	0.42047	0.411004	0.577706	0.276961	0.313647	0.455899	0.355643	0.337627	0.434868	0.559485	0.399334	0.345122	0.386346	0.445474	0.374754	0.388815	0.405944	0.381518
70.1682	-41.7405	0.43056	0.398491	0.545598	0.276281	0.312957	0.465675	0.333826	0.345505	0.447185	0.527716	0.396391	0.335942	0.406962	0.43149	0.369252	0.387381	0.428413	0.367977
70.1628	-41.7484	0.43725	0.390151	0.513568	0.286691	0.305007	0.475238	0.319108	0.344874	0.485105	0.485934	0.395831	0.320317	0.42484	0.423373	0.367735	0.383446	0.439597	0.366444
70.1593	-41.7537	0.433937	0.394327	0.500788	0.286402	0.30474	0.474884	0.318903	0.327761	0.510346	0.465071	0.397868	0.307112	0.432378	0.42517	0.367655	0.378323	0.444374	0.367927
70.1539	-41.7617	0.423839	0.415401	0.488567	0.2421	0.322645	0.448574	0.339884	0.302328	0.535555	0.45465	0.395415	0.30046	0.434757	0.423054	0.37285	0.369428	0.449149	0.373918
70.1503	-41.7669	0.413776	0.43654	0.489114	0.198104	0.340826	0.422619	0.353926	0.293895	0.528973	0.480524	0.386378	0.304782	0.429535	0.42106	0.379434	0.363118	0.452361	0.375422
70.1449	-41.7749	0.403756	0.46635	0.509462	0.154479	0.352417	0.391795	0.382485	0.277373	0.516395	0.532757	0.366228	0.317905	0.421931	0.415276	0.39004	0.354329	0.458826	0.372439
70.1413	-41.7802	0.403761	0.474994	0.522901	0.143692	0.35661	0.381798	0.404212	0.260888	0.516836	0.564534	0.350596	0.331084	0.414356	0.411488	0.396714	0.349331	0.463694	0.369459
70.1359	-41.7882	0.407101	0.470793	0.555135	0.13293	0.360982	0.393135	0.405163	0.26991	0.511512	0.586449	0.34431	0.34455	0.396438	0.419579	0.403533	0.339326	0.468591	0.369498
70.1323	-41.7936	0.413792	0.462387	0.568062	0.155304	0.354178	0.40939	0.405835	0.278818	0.518813	0.566363	0.358429	0.342772	0.388819	0.42959	0.403713	0.334337	0.468636	0.372526
70.1268	-41.8016	0.423858	0.436874	0.560691	0.255251	0.336318	0.436027	0.399311	0.287652	0.538953	0.509555	0.397774	0.330242	0.383831	0.451477	0.397383	0.331899	0.465483	0.377065
70.1231	-41.807	0.430585	0.419925	0.540777	0.310356	0.325156	0.446203	0.399191	0.287575	0.558274	0.462546	0.422896	0.32822	0.383944	0.46737	0.389612	0.333212	0.463914	0.378586
70.1176	-41.8151	0.437272	0.415842	0.508965	0.320877	0.313591	0.461174	0.391622	0.278757	0.570503	0.42036	0.436039	0.336782	0.397138	0.475403	0.379134	0.339562	0.46395	0.381611
70.1139	-41.8205	0.440529	0.424527	0.516233	0.265808	0.313457	0.476974	0.355989	0.337893	0.538735	0.409817	0.431169	0.343142	0.410296	0.469575	0.375159	0.345888	0.462353	0.386126
70.1083	-41.8287	0.450266	0.442056	0.556996	0.15567	0.328752	0.467568	0.306324	0.49945	0.489122	0.368779	0.42893	0.340959	0.423493	0.463776	0.365897	0.357266	0.462375	0.392152
70.1027	-41.8369	0.453521	0.468079	0.552624	0.212057	0.330343	0.421352	0.320876	0.55142	0.52291	0.317568	0.445597	0.326136	0.418403	0.469801	0.352731	0.36739	0.462403	0.395174
70.099	-41.8423	0.453523	0.476747	0.533732	0.268112	0.34215	0.368985	0.378039	0.509404	0.56859	0.302313	0.452905	0.326419	0.405438	0.47382	0.348813	0.37121	0.460819	0.396689
70.0934	-41.8506	0.453525	0.472418	0.514013	0.267601	0.367804	0.316073	0.470654	0.416106	0.607038	0.318121	0.446231	0.344013	0.389879	0.477872	0.350212	0.375077	0.459266	0.398221
70.0896	-41.8561	0.453528	0.463767	0.50701	0.267227	0.367332	0.315745	0.51342	0.365179	0.600062	0.354581	0.430154	0.359212	0.389989	0.479946	0.352924	0.376403	0.459313	0.399749
70.084	-41.8643	0.45353	0.455134	0.506475	0.289351	0.348627	0.341729	0.527857	0.339762	0.580374	0.396275	0.414144	0.359085	0.405787	0.493889	0.354394	0.373962	0.462599	0.399787
70.0802	-41.8698	0.453532	0.455138	0.512945	0.311908	0.334123	0.357562	0.520991	0.331328	0.593419	0.396456	0.416622	0.343865	0.421542	0.507808	0.353193	0.370222	0.467474	0.399814
70.0746	-41.8781	0.453535	0.455143	0.545309	0.323929	0.32749	0.363432	0.514606	0.314617	0.626359	0.386535	0.421646	0.326607	0.434761	0.517839	0.355971	0.362693	0.477192	0.405867
70.0708	-41.8836	0.453537	0.463786	0.552405	0.324392	0.335415	0.358763	0.515268	0.306428	0.633383	0.386868	0.42427	0.324614	0.429622	0.515929	0.361299	0.357652	0.485271	0.408895
70.0651	-41.8919	0.45354	0.476781	0.540303	0.335825	0.354498	0.338292	0.530252	0.30686	0.614566	0.392307	0.426824	0.340146	0.414131	0.506192	0.36263	0.351308	0.496546	0.417932
70.0613	-41.8975	0.453542	0.476786	0.540314	0.335833	0.365802	0.322618	0.537511	0.324094	0.59541	0.392315	0.426833	0.355536	0.406428	0.498399	0.358649	0.348745	0.499743	0.42695
70.0556	-41.9057	0.453544	0.476791	0.520853	0.369164	0.369579	0.317394	0.537523	0.358411	0.5633	0.381706	0.433634	0.366537	0.409263	0.488681	0.348044	0.34615	0.501298	0.437455
70.0518	-41.9113	0.453547	0.472461	0.514115	0.368804	0.369278	0.317175	0.537199	0.392552	0.537432	0.381556	0.433497	0.366456	0.425128	0.488804	0.338805	0.341047	0.499638	0.441941
70.0461	-41.9196	0.460055	0.451077	0.53272	0.335055	0.365059	0.322062	0.536704	0.409389	0.524247	0.381319	0.428623	0.353061	0.459233	0.500757	0.326957	0.333419	0.486682	0.441889
70.0403	-41.928	0.469844	0.434158	0.538918	0.301335	0.364606	0.321717	0.536207	0.409063	0.517337	0.391522	0.416827	0.343994	0.46144	0.522257	0.325644	0.323259	0.475336	0.432812
70.0365	-41.9336	0.469847	0.434162	0.532449	0.278761	0.367899	0.316166	0.542933	0.417408	0.504177	0.407049	0.407513	0.346026	0.437456	0.537725	0.330909	0.31437	0.468837	0.425255
70.0308	-41.9419	0.46985	0.434167	0.513048	0.278362	0.367435	0.315826	0.54964	0.400045	0.503686	0.427734	0.402862	0.350333	0.395069	0.547091	0.340067	0.302913	0.455846	0.425179
70.027	-41.9475	0.469852	0.434171	0.500132	0.289296	0.363538	0.32092	0.542257	0.391267	0.503312	0.432722	0.407393	0.354726	0.371314	0.542897	0.345263	0.29653	0.444491	0.434136
70.0214	-41.9558	0.469855	0.434175	0.480776	0.300054	0.35201	0.341585	0.5421	0.356951	0.502684	0.427007	0.413967	0.363377	0.355471	0.522954	0.35037	0.291375	0.426655	0.45658
70.0176	-41.9613	0.469858	0.43418	0.474339	0.288733	0.340511	0.356882	0.54176	0.339675	0.50868	0.416238	0.408964	0.371843	0.355378	0.510998	0.350248	0.292581	0.415319	0.470043
70.0119	-41.9696	0.46986	0.434184	0.474349	0.277572	0.332916	0.361795	0.534215	0.322324	0.52752	0.384623	0.396788	0.384384	0.357798	0.500925	0.352747	0.293785	0.400762	0.475977
70.0081	-41.9751	0.469863	0.434188	0.487256	0.255507	0.347836	0.341106	0.534228	0.305281	0.540246	0.363691	0.394196	0.384144	0.362924	0.498856	0.355344	0.292503	0.395909	0.472944
70.0024	-41.9833	0.469865	0.434193	0.506648	0.222343	0.385239	0.289198	0.512631	0.322065	0.57259	0.311706	0.416976	0.360262	0.38119	0.502812	0.356702	0.28999	0.392695	0.471438
69.9986	-41.9888	0.469868	0.434197	0.506658	0.222348	0.396499	0.262961	0.512316	0.355958	0.611941	0.254742	0.444617	0.33659	0.396986	0.508879	0.356807	0.286236	0.394334	0.474469
69.9929	-41.997	0.469871	0.425589	0.506121	0.244475	0.359037	0.299093	0.55498	0.373353	0.599719	0.296698	0.43854	0.323787	0.405003	0.526844	0.357009	0.281259	0.404071	0.477551
69.9892	-42.0025	0.469873	0.421293	0.499406	0.266569	0.329215	0.340504	0.576604	0.373681	0.548056	0.390725	0.404589	0.339041	0.397262	0.532853	0.361062	0.282585	0.41058	0.477612
69.9835	-42.0106	0.469876	0.429901	0.487046	0.277744	0.351736	0.320198	0.591609	0.374235	0.516183	0.406527	0.393152	0.367451	0.381783	0.527096	0.373039	0.291551	0.412308	0.473188
69.9779	-42.0187	0.469879	0.442833	0.500768	0.278428	0.401305	0.247736	0.606848	0.366306	0.549446	0.360096	0.416507	0.363569	0.390047	0.521565	0.373171	0.305587	0.404368	0.465735
69.9742	-42.0241	0.469881	0.455791	0.514549	0.267886	0.413313	0.232375	0.593172	0.375097	0.595624	0.345073	0.424009	0.348639	0.408714	0.523873	0.369343	0.313269	0.394772	0.461258
69.9686	-42.0322	0.469884	0.481788	0.503215	0.268395	0.402695	0.259103	0.5581	0.383791	0.641793	0.372079	0.413323	0.327041	0.451127	0.5303	0.365602	0.312105	0.388397	0.458292
69.9648	-42.0376	0.469887	0.499186	0.478268	0.279655	0.387784	0.285491	0.543984	0.375218	0.635095	0.419456	0.395096	0.322615	0.477558	0.532509	0.364379	0.307069	0.393255	0.461324
69.9592	-42.0457	0.469889	0.516633	0.45326	0.279661	0.365203	0.316863	0.536757	0.357976	0.582301	0.460711	0.3809	0.331051	0.480004	0.540321	0.365711	0.304535	0.409387	0.467377
69.9555	-42.0512	0.469892	0.512273	0.45953	0.268412	0.353787	0.327068	0.536429	0.349216	0.555773	0.449489	0.385005	0.350515	0.4456	0.547899	0.368282	0.304504	0.42227	0.473406
69.9499	-42.0593	0.469894	0.481808	0.503256	0.234699	0.342095	0.331683	0.535586	0.348727	0.561612	0.422807	0.384424	0.389624	0.371702	0.549247	0.3707	0.309481	0.433495	0.486923
69.9462	-42.0647	0.469897	0.460142	0.521385	0.234487	0.334325	0.331199	0.534908	0.365429	0.574377	0.428078	0.377512	0.409296	0.329541	0.544985	0.371879	0.311953	0.436674	0.489908
69.9406	-42.0727	0.4699	0.429934	0.538865	0.24524	0.326427	0.34121	0.5344	0.382208	0.580762	0.438615	0.386963	0.409605	0.308524	0.538987	0.371811	0.309378	0.443085	0.477866
69.9368	-42.0781	0.469902	0.417043	0.544464	0.256214	0.318829	0.356754	0.534413	0.382217	0.567734	0.433173	0.405418	0.394466	0.327015	0.539164	0.370557	0.305597	0.444706	0.462836
69.9312	-42.0861	0.469905	0.412755	0.518329	0.311532	0.311381	0.383035	0.520531	0.365242	0.522018	0.437692	0.416591	0.378998	0.377096	0.545447	0.37074	0.299336	0.431852	0.446295
69.9275	-42.0915	0.469908	0.412759	0.505438	0.333616	0.318844	0.399291	0.499735	0.331281	0.495763	0.442372	0.406927	0.380786	0.405983	0.547535	0.370797	0.299364	0.418971	0.446281
69.9219	-42.0995	0.46991	0.417055	0.505724	0.344993	0.330337	0.432064	0.443664	0.263264	0.501629	0.44199	0.381083	0.393229	0.421553	0.531597	0.374636	0.310749	0.407685	0.453778
69.9163	-42.1076	0.469913	0.429962	0.519481	0.345853	0.338547	0.427841	0.422794	0.246421	0.534244	0.442586	0.362901	0.399712	0.416298	0.505841	0.37444	0.323356	0.41573	0.461302
69.9125	-42.113	0.469915	0.434275	0.545682	0.312924	0.346351	0.40703	0.430037	0.289185	0.554619	0.443464	0.365793	0.393641	0.408615	0.498057	0.369133	0.322057	0.428608	0.467331
69.907	-42.121	0.469918	0.447216	0.546583	0.290852	0.346505	0.391119	0.444239	0.38335	0.562712	0.439335	0.394461	0.377158	0.393241	0.510219	0.360049	0.305602	0.447938	0.473376
69.9032	-42.1264	0.469921	0.455867	0.514696	0.324196	0.335249	0.38536	0.472601	0.434832	0.53741	0.439528	0.413291	0.371003	0.38552	0.526198	0.354897	0.292953	0.457607	0.474897
69.8976	-42.1344	0.469923	0.455871	0.482324	0.379617	0.316523	0.379332	0.515051	0.434842	0.498224	0.449521	0.415361	0.375278	0.388146	0.54404	0.351028	0.281559	0.462429	0.476402
69.8938	-42.1398	0.469926	0.455876	0.482334	0.368367	0.320139	0.368676	0.52919	0.374795	0.523462	0.449241	0.403493	0.379324	0.393255	0.553824	0.348386	0.277743	0.462404	0.4809
69.8882	-42.1478	0.469929	0.45588	0.514727	0.26799	0.353296	0.348017	0.522141	0.263586	0.632494	0.439096	0.394305	0.381435	0.37731	0.565483	0.339075	0.273883	0.468785	0.485384
69.8844	-42.1532	0.469931	0.45156	0.540431	0.200994	0.375355	0.353735	0.479418	0.212278	0.709489	0.439473	0.399243	0.377318	0.361532	0.563439	0.337713	0.268779	0.478409	0.48237
69.8787	-42.1613	0.469934	0.438614	0.552552	0.156109	0.389556	0.364296	0.429019	0.194921	0.7537	0.455218	0.392376	0.370683	0.364064	0.553438	0.341602	0.26748	0.483206	0.473336
69.8749	-42.1668	0.469936	0.43	0.532511	0.166925	0.385137	0.352972	0.442487	0.211634	0.740083	0.465291	0.380525	0.368136	0.379679	0.547402	0.338872	0.280129	0.46548	0.474804
69.8692	-42.175	0.469939	0.4171	0.492923	0.232988	0.354752	0.34094	0.476515	0.262028	0.674586	0.474631	0.382227	0.354574	0.403001	0.535328	0.32412	0.320602	0.418772	0.483743
69.8654	-42.1804	0.469942	0.404227	0.479256	0.2881	0.328684	0.350644	0.475723	0.321042	0.609959	0.473807	0.384033	0.349893	0.402667	0.533053	0.314711	0.348398	0.399452	0.476196
69.8596	-42.1887	0.469944	0.391386	0.472059	0.354374	0.302962	0.365844	0.461084	0.397114	0.539349	0.457446	0.378796	0.360355	0.373352	0.536423	0.314527	0.366039	0.407512	0.446146
69.8538	-42.1969	0.469947	0.39139	0.49776	0.366291	0.299913	0.37171	0.44035	0.439946	0.494908	0.441729	0.383246	0.375641	0.339202	0.532228	0.328996	0.349558	0.441311	0.417621
69.85	-42.2024	0.473216	0.391492	0.523816	0.355976	0.311628	0.372708	0.419825	0.45755	0.476207	0.442035	0.388104	0.37808	0.342035	0.518652	0.340932	0.333136	0.459026	0.404118
69.8443	-42.2106	0.483039	0.396072	0.557312	0.312584	0.33851	0.363698	0.406802	0.475747	0.477434	0.432512	0.395635	0.358864	0.376509	0.507296	0.350346	0.319302	0.463902	0.399637
69.8405	-42.216	0.486323	0.404752	0.571218	0.279545	0.350074	0.364363	0.407459	0.47645	0.497603	0.428003	0.393789	0.33939	0.389647	0.521212	0.350473	0.316833	0.460726	0.40116
69.8347	-42.2242	0.486326	0.426255	0.55325	0.279819	0.35038	0.369988	0.422292	0.468553	0.537299	0.428928	0.380461	0.319827	0.386823	0.538818	0.351844	0.315596	0.462361	0.411701
69.8309	-42.2297	0.486329	0.434884	0.534337	0.290953	0.350388	0.364646	0.451062	0.451792	0.563603	0.42411	0.373722	0.319872	0.37099	0.534693	0.354405	0.31175	0.467148	0.426721
69.8251	-42.2379	0.486332	0.434888	0.514871	0.324294	0.350396	0.343277	0.486623	0.426173	0.582964	0.424208	0.371459	0.330841	0.355292	0.508966	0.356863	0.305314	0.46703	0.455226
69.8213	-42.2434	0.486335	0.434893	0.508398	0.335396	0.350404	0.327273	0.493391	0.425941	0.569606	0.423859	0.378215	0.330806	0.371139	0.49135	0.355483	0.305278	0.460546	0.465715
69.8155	-42.2517	0.486337	0.434897	0.527872	0.302092	0.350411	0.305953	0.499986	0.417018	0.529876	0.422976	0.391562	0.321881	0.415853	0.503502	0.343762	0.310403	0.44288	0.462705
69.8116	-42.2572	0.48634	0.430587	0.547097	0.279849	0.34666	0.295199	0.499514	0.416673	0.496908	0.443289	0.39363	0.328339	0.423804	0.535262	0.333399	0.314298	0.42846	0.456713
69.8058	-42.2655	0.486343	0.413369	0.55892	0.268341	0.342473	0.28946	0.498714	0.424627	0.496428	0.458671	0.379599	0.35654	0.402852	0.551038	0.346753	0.314419	0.414045	0.450728
69.8019	-42.271	0.486346	0.400493	0.558024	0.256739	0.338144	0.294239	0.50527	0.415717	0.547972	0.438042	0.363321	0.367186	0.394841	0.540978	0.36521	0.31191	0.407606	0.450721
69.7961	-42.2794	0.486349	0.383365	0.530953	0.27814	0.326075	0.303831	0.540037	0.372819	0.612076	0.412035	0.346937	0.360201	0.394404	0.556389	0.358518	0.311846	0.402715	0.44917
69.7902	-42.2878	0.486352	0.370556	0.504327	0.33301	0.31462	0.308547	0.575248	0.30479	0.597948	0.421744	0.34652	0.346763	0.399202	0.599489	0.320172	0.311713	0.417121	0.438611
69.7863	-42.2933	0.486355	0.37056	0.504336	0.355381	0.307456	0.319126	0.582838	0.271025	0.545859	0.447117	0.350919	0.340124	0.399011	0.619075	0.301654	0.309107	0.433176	0.435602
69.7804	-42.3017	0.486358	0.357771	0.587307	0.334688	0.312263	0.309634	0.584202	0.288611	0.495198	0.447232	0.35795	0.333753	0.385854	0.624851	0.296337	0.307802	0.449261	0.45366
69.7764	-42.3073	0.48636	0.345016	0.651119	0.324517	0.324328	0.300023	0.571105	0.331776	0.502985	0.416807	0.362917	0.329691	0.378125	0.61703	0.301624	0.309088	0.452509	0.470221
69.7705	-42.3156	0.486363	0.319579	0.707371	0.347555	0.343835	0.311797	0.544318	0.375448	0.511202	0.407513	0.361356	0.332349	0.370638	0.601576	0.310928	0.31423	0.447756	0.483794
69.7665	-42.3211	0.486366	0.311137	0.719588	0.358855	0.355296	0.317606	0.537928	0.393071	0.498898	0.434227	0.357252	0.337033	0.365669	0.597896	0.314973	0.316833	0.4446	0.486837
69.7605	-42.3294	0.486369	0.345008	0.670679	0.34757	0.355154	0.328196	0.545366	0.401903	0.512353	0.455829	0.357795	0.339608	0.371306	0.592422	0.321722	0.31567	0.446299	0.488401
69.7565	-42.3349	0.486372	0.374842	0.627641	0.325001	0.347334	0.333069	0.559372	0.393199	0.54484	0.44555	0.357861	0.346239	0.384693	0.580877	0.327073	0.313183	0.452787	0.486935
69.7505	-42.3432	0.486375	0.366298	0.639986	0.291182	0.33563	0.321688	0.579683	0.392667	0.544168	0.43982	0.362177	0.357048	0.395335	0.569176	0.335034	0.306868	0.460856	0.48846
69.7465	-42.3488	0.486378	0.332286	0.689105	0.279928	0.331742	0.305491	0.578763	0.400699	0.524049	0.449725	0.361878	0.361222	0.395233	0.565117	0.337632	0.304308	0.459212	0.495958
69.7406	-42.3572	0.486381	0.32806	0.695227	0.279934	0.335501	0.294971	0.556919	0.39168	0.516887	0.46496	0.350058	0.358674	0.392264	0.558831	0.336143	0.305481	0.449448	0.512423
69.7366	-42.3629	0.486384	0.345042	0.670719	0.27994	0.343018	0.300517	0.550239	0.36621	0.516767	0.470138	0.345411	0.352017	0.386795	0.552652	0.333362	0.307934	0.444545	0.522893
69.7306	-42.3714	0.486386	0.366324	0.653021	0.280213	0.350842	0.31163	0.565788	0.324155	0.523692	0.465279	0.347921	0.341245	0.381473	0.540686	0.323961	0.310353	0.444451	0.531852
69.7246	-42.38	0.486389	0.332262	0.721745	0.280619	0.351294	0.333356	0.574314	0.307691	0.537565	0.455513	0.352942	0.339398	0.379082	0.536946	0.310748	0.311577	0.442806	0.533329
69.7207	-42.3857	0.486392	0.323816	0.733961	0.280625	0.351302	0.349418	0.574864	0.316555	0.544653	0.450713	0.357848	0.344043	0.376718	0.537193	0.305529	0.311603	0.436379	0.533325
69.7148	-42.3942	0.486395	0.345037	0.703335	0.280631	0.347542	0.360009	0.567787	0.35958	0.532231	0.445717	0.367313	0.353086	0.379715	0.53559	0.306976	0.307881	0.428373	0.533341
69.7108	-42.3999	0.486398	0.323835	0.720946	0.302951	0.340021	0.365114	0.55309	0.402335	0.506293	0.445542	0.371869	0.359684	0.382475	0.531768	0.314967	0.301595	0.430007	0.533362
69.7049	-42.4083	0.486401	0.315395	0.694165	0.358447	0.324851	0.369807	0.516144	0.444343	0.486192	0.4449	0.376111	0.363865	0.382378	0.531676	0.332192	0.2877	0.439678	0.53038
69.7009	-42.4139	0.486404	0.336559	0.637664	0.380305	0.317079	0.369277	0.479333	0.468997	0.492014	0.444439	0.373471	0.36141	0.382143	0.543328	0.336166	0.281367	0.449336	0.52438
69.6949	-42.4223	0.486407	0.383427	0.550602	0.368498	0.320291	0.358212	0.435339	0.484644	0.503948	0.443783	0.366051	0.352198	0.381657	0.566595	0.330832	0.280058	0.467028	NaN
69.6909	-42.4278	0.486409	0.404872	0.519691	0.34601	0.327511	0.347564	0.43507	0.46725	0.509963	0.443504	0.358888	0.345368	0.378693	0.576126	0.329445	0.283828	0.476684	NaN
69.685	-42.436	0.486412	0.426383	0.495172	0.323708	0.342362	0.326645	0.485355	0.425243	0.503588	0.443514	0.344945	0.345109	0.357339	0.589441	0.326704	0.295191	0.483137	NaN
69.6811	-42.4414	0.486415	0.435015	0.495708	0.312778	0.35378	0.305814	0.535905	0.391802	0.497461	0.443715	0.340421	0.347304	0.341532	0.597157	0.324041	0.302787	0.481549	NaN
69.6751	-42.4497	0.486418	0.43502	0.521674	0.302124	0.354243	0.300819	0.55798	0.375192	0.510898	0.444201	0.338393	0.354057	0.320634	0.603054	0.329377	0.305373	0.476771	NaN
69.6712	-42.4551	0.486421	0.435024	0.534682	0.291154	0.350639	0.311491	0.54387	0.383782	0.517567	0.4444	0.343169	0.356436	0.310222	0.607056	0.337382	0.301632	0.471978	NaN
69.6652	-42.4634	0.486424	0.4264	0.553629	0.257493	0.350348	0.327274	0.529575	0.392265	0.511048	0.449587	0.354819	0.350088	0.320854	0.605328	0.35471	0.291602	0.462371	NaN
69.6592	-42.4717	0.486427	0.413493	0.552741	0.234664	0.357112	0.337581	0.514958	0.383357	0.517075	0.465118	0.357155	0.347945	0.347297	0.597815	0.369405	0.281553	0.45598	NaN
69.6552	-42.4773	0.486429	0.413498	0.526797	0.256647	0.364315	0.326924	0.521869	0.357561	0.53612	0.470298	0.357162	0.347951	0.368464	0.590214	0.373449	0.279057	0.454401	NaN
69.6492	-42.4857	0.486432	0.413502	0.507378	0.278693	0.375423	0.305856	0.535992	0.349008	0.568608	0.465437	0.35968	0.345938	0.400348	0.572954	0.364232	0.284136	0.459263	NaN
69.6452	-42.4913	0.486435	0.413506	0.51386	0.301269	0.37592	0.290211	0.536004	0.383266	0.575736	0.455382	0.364532	0.346157	0.41379	0.563409	0.35367	0.28793	0.465719	NaN
69.6392	-42.4998	0.486438	0.426421	0.52119	0.35818	0.358524	0.295963	0.515179	0.460751	0.551134	0.440206	0.378788	0.344389	0.419441	0.555863	0.357748	0.280372	0.473816	NaN
69.6352	-42.5054	0.486441	0.443689	0.515819	0.381309	0.344199	0.328134	0.501838	0.470043	0.545392	0.4301	0.390667	0.340328	0.411709	0.553987	0.375058	0.270297	0.472251	NaN
69.6292	-42.5139	0.486444	0.452345	0.516382	0.370373	0.340577	0.360277	0.53183	0.428225	0.539506	0.419883	0.402498	0.336216	0.395967	0.55396	0.398983	0.266581	0.46266	NaN
69.6252	-42.5195	0.486447	0.435052	0.528294	0.336134	0.351165	0.360026	0.560581	0.402589	0.532831	0.430295	0.400166	0.333982	0.387942	0.557763	0.408253	0.27042	0.459477	NaN
69.6191	-42.528	0.48645	0.417826	0.533651	0.290646	0.365154	0.33291	0.580947	0.38484	0.538482	0.461478	0.383804	0.320525	0.3875	0.567229	0.416118	0.272953	0.464321	NaN
69.6151	-42.5336	0.486452	0.430749	0.528027	0.279682	0.365317	0.317023	0.57334	0.384526	0.551183	0.466679	0.374463	0.309404	0.392482	0.568967	0.417362	0.270383	0.47235	NaN
69.609	-42.5421	0.486455	0.452364	0.548978	0.269474	0.366403	0.323182	0.538493	0.402055	0.551882	0.456589	0.367643	0.315991	0.379356	0.557023	0.413257	0.26905	0.483571	NaN
69.605	-42.5477	0.486458	0.461031	0.562644	0.269979	0.370808	0.334493	0.532388	0.419981	0.53327	0.441184	0.372443	0.335916	0.358606	0.541367	0.406571	0.272818	0.488381	NaN
69.5989	-42.5562	0.486461	0.461036	0.569195	0.258791	0.367033	0.345118	0.554406	0.411815	0.533661	0.42028	0.381745	0.364645	0.353802	0.512133	0.393272	0.285462	0.488377	NaN
69.5928	-42.5647	0.486464	0.443725	0.554938	0.23554	0.362046	0.327959	0.574119	0.384991	0.571452	0.414486	0.383655	0.344591	0.41701	0.49459	0.385304	0.296863	0.478716	NaN
69.5887	-42.5703	0.486467	0.426464	0.534269	0.245989	0.364888	0.316713	0.558361	0.375435	0.583138	0.419095	0.383217	0.315775	0.463982	0.502458	0.382679	0.293052	0.469015	NaN
69.5825	-42.5788	0.48647	0.413555	0.513983	0.278907	0.37945	0.3115	0.536669	0.306593	0.575014	0.460193	0.371307	0.304483	0.476628	0.533872	0.385438	0.266422	0.454417	NaN
69.5784	-42.5845	0.486473	0.422164	0.514544	0.301657	0.383882	0.322746	0.530638	0.281398	0.555895	0.476026	0.362173	0.315403	0.452958	0.555499	NaN	NaN	0.451146	NaN
69.5723	-42.5929	0.486475	0.435107	0.534887	0.325102	0.370083	0.344667	0.539237	0.342265	0.525372	0.445435	0.357814	0.339652	0.411119	0.579209	NaN	NaN	0.459195	NaN
69.5682	-42.5986	0.486478	0.426481	0.540828	0.324943	0.358619	0.333461	0.574577	0.376637	0.532312	0.419381	0.360094	0.359416	0.392895	0.587213	NaN	NaN	0.460823	NaN
69.5621	-42.6071	0.486481	0.396383	0.545287	0.324029	0.335181	0.321381	0.564729	0.366459	0.562893	0.434263	0.364279	0.378919	0.385049	0.601094	NaN	NaN	0.430223	NaN
69.558	-42.6128	0.486484	0.379262	0.570003	0.312793	0.320064	0.347381	0.499763	0.33133	0.574065	0.454285	0.366183	0.376448	0.392765	0.612846	NaN	NaN	0.404455	NaN
69.5518	-42.6213	0.486487	0.362186	0.646597	0.257643	0.320483	0.374458	0.443262	0.305749	0.580135	0.427788	0.370402	0.356484	0.405503	0.624401	NaN	NaN	0.386761	NaN
69.5477	-42.627	0.48649	0.35367	0.684964	0.235571	0.335782	0.359248	0.465361	0.31484	0.568154	0.401948	0.375063	0.33905	0.40528	0.628137	NaN	NaN	0.385166	NaN
69.5416	-42.6355	0.486493	0.336669	0.709532	0.213032	0.361822	0.338502	0.530701	0.315747	0.549985	0.397288	0.37779	0.321819	0.389369	0.629848	NaN	NaN	0.393218	NaN
69.5373	-42.6414	0.486496	0.323954	0.708376	0.223998	0.369045	0.327815	0.559388	0.34168	0.53107	0.413277	0.378117	0.31545	0.378865	0.629776	NaN	NaN	0.399645	NaN
69.5312	-42.6499	0.486498	0.311267	0.674774	0.301743	0.353852	0.327231	0.573004	0.375751	0.505063	0.460483	0.373838	0.31561	0.379013	0.624002	NaN	NaN	0.399618	NaN
69.5251	-42.6583	0.486501	0.31127	0.635957	0.401993	0.324274	0.326631	0.55039	0.400645	0.504441	0.481099	0.380782	0.320082	0.384455	0.624243	NaN	NaN	0.378664	NaN
69.521	-42.6639	0.486504	0.319729	0.610825	0.446658	0.305807	0.331598	0.521158	0.417095	0.50394	0.485971	0.392265	0.315778	0.392406	0.628329	NaN	NaN	0.356119	NaN
69.5149	-42.6723	0.486507	0.328205	0.605043	0.413071	0.309297	0.320844	0.484626	0.441799	0.490286	0.495776	0.403611	0.302621	0.410729	0.630357	NaN	NaN	0.319075	NaN
69.5108	-42.6779	0.48651	0.328208	0.617984	0.357178	0.327625	0.299822	0.469931	0.458388	0.47053	0.495245	0.403274	0.300251	0.418445	0.628266	NaN	NaN	0.302967	NaN
69.5046	-42.6863	0.486513	0.328211	0.630943	0.290078	0.34579	0.289313	0.462597	0.466677	0.437934	0.4946	0.384233	0.306291	0.428598	0.614135	NaN	NaN	0.301347	NaN
69.5005	-42.6919	0.486516	0.328214	0.630956	0.278866	0.349393	0.28932	0.469795	0.458276	0.42496	0.483881	0.374673	0.308166	0.438893	0.598187	NaN	NaN	0.30777	NaN
69.4944	-42.7004	0.486518	0.328217	0.630968	0.312553	0.338604	0.289327	0.498586	0.433154	0.412103	0.468038	0.36977	0.312301	0.446661	0.578365	NaN	NaN	0.312546	NaN
69.4903	-42.706	0.486521	0.32822	0.63098	0.357553	0.316689	0.299741	0.52021	0.424979	0.405834	0.468153	0.365196	0.318822	0.44411	0.570494	NaN	NaN	0.30606	NaN
69.4841	-42.7145	0.486524	0.328223	0.630993	0.391369	0.294623	0.315335	0.541853	0.442493	0.399867	0.468581	0.358487	0.334178	0.433873	0.564709	NaN	NaN	0.293135	NaN
69.48	-42.7202	0.486527	0.323987	0.637133	0.391378	0.294629	0.325967	0.542223	0.451338	0.400185	0.474157	0.354095	0.343026	0.428832	0.562881	NaN	NaN	0.293136	NaN
69.4738	-42.7287	0.48653	0.298629	0.654407	0.390817	0.305478	0.347253	0.528496	0.460185	0.413519	0.474692	0.352081	0.34978	0.42912	0.561155	NaN	NaN	0.304447	NaN
69.4697	-42.7344	0.486533	0.290214	0.653682	0.367948	0.327398	0.347522	0.514403	0.468785	0.433175	0.469847	0.349943	0.347684	0.437114	0.563283	NaN	NaN	0.310927	NaN
69.4635	-42.7429	0.486536	0.311298	0.623194	0.334272	0.349448	0.342585	0.521967	0.434839	0.459152	0.464891	0.347743	0.33678	0.458152	0.563429	NaN	NaN	0.315808	NaN
69.4574	-42.7514	0.486539	0.328238	0.598715	0.323053	0.353054	0.331931	0.5361	0.391942	0.484648	0.454268	0.354552	0.323646	0.476446	0.559508	NaN	NaN	0.309376	NaN
69.4532	-42.7571	0.486541	0.328241	0.598726	0.300631	0.360251	0.310639	0.535418	0.391509	0.49719	0.448816	0.356702	0.314815	0.486779	0.557464	NaN	NaN	0.302912	NaN
69.447	-42.7655	0.486544	0.328244	0.598738	0.278241	0.356194	0.289061	0.512576	0.441689	0.490178	0.448335	0.356399	0.305872	0.491662	0.555247	NaN	NaN	0.298022	NaN
69.4429	-42.7712	0.486547	0.328248	0.59875	0.278247	0.344974	0.294046	0.483493	0.483642	0.470546	0.447946	0.356156	0.303533	0.49408	0.551154	NaN	NaN	0.297979	NaN
69.4367	-42.7797	0.48655	0.328251	0.598761	0.25586	0.337206	0.314811	0.461964	0.525962	0.438295	0.442409	0.346622	0.31195	0.491248	0.539111	NaN	NaN	0.30436	NaN
69.4326	-42.7852	0.486553	0.328254	0.598773	0.233504	0.333185	0.330359	0.476336	0.54341	0.419252	0.437268	0.337347	0.320519	0.485965	0.529156	NaN	NaN	0.310766	NaN
69.4263	-42.7935	0.486556	0.328257	0.598785	0.22234	0.329317	0.340715	0.519494	0.561539	0.394076	0.427159	0.328194	0.329171	0.480777	0.515315	NaN	NaN	0.318782	NaN
69.4222	-42.7991	0.486559	0.32826	0.585875	0.255634	0.32947	0.346158	0.527059	0.570635	0.38797	0.427449	0.326055	0.333634	0.473034	0.513376	NaN	NaN	0.321996	NaN
69.416	-42.8075	0.496423	0.320043	0.553966	0.344533	0.34874	0.331403	0.484844	0.562047	0.407428	0.438164	0.328613	0.338235	0.468063	0.517506	NaN	NaN	0.315571	NaN
69.4119	-42.8131	0.503019	0.320208	0.528823	0.400211	0.364217	0.305619	0.456346	0.518802	0.452297	0.438173	0.335588	0.336188	0.473455	0.521602	NaN	NaN	0.309145	NaN
69.4057	-42.8216	0.496429	0.328525	0.515971	0.42223	0.364225	0.279021	0.455612	0.432527	0.515533	0.432446	0.356146	0.321014	0.505057	0.511973	NaN	NaN	0.309146	NaN
69.4016	-42.8273	0.48328	0.336676	0.528255	0.377413	0.359852	0.27321	0.476253	0.398046	0.521081	0.437128	0.362802	0.310007	0.539158	0.492367	NaN	NaN	0.315571	NaN
69.3954	-42.8357	0.470183	0.34056	0.55308	0.332876	0.336964	0.304032	0.497317	0.381015	0.514323	0.436845	0.353328	0.307544	0.581127	0.470833	NaN	NaN	NaN	NaN
69.3892	-42.8442	0.470185	0.327848	0.616524	0.311639	0.315308	0.341018	0.483949	0.398535	0.515148	0.416447	0.35346	0.316365	0.589428	0.465154	NaN	NaN	NaN	NaN
69.3851	-42.8498	0.473459	0.323705	0.655332	0.312532	0.312403	0.35763	0.456428	0.416115	0.528977	0.40143	0.363078	0.323304	0.571528	0.469264	NaN	NaN	NaN	NaN
69.379	-42.8582	0.483296	0.311272	0.68776	0.335855	0.328361	0.364462	0.422077	0.425552	0.549669	0.412913	0.366241	0.343615	0.516944	0.485182	NaN	NaN	NaN	NaN
69.3748	-42.8639	0.486584	0.30713	0.681284	0.346975	0.347172	0.349075	0.429581	0.425929	0.550097	0.429013	0.36429	0.354812	0.47756	0.500899	NaN	NaN	NaN	NaN
69.3687	-42.8722	0.476742	0.319569	0.635962	0.357024	0.365078	0.306213	0.493306	0.417361	0.530368	0.418111	0.370917	0.361269	0.448371	0.518403	NaN	NaN	NaN	NaN
69.3646	-42.8778	0.463657	0.331926	0.603348	0.355986	0.360375	0.289494	0.542167	0.399871	0.516673	0.401711	0.377262	0.358763	0.456015	0.520231	NaN	NaN	NaN	NaN
69.3584	-42.8861	0.44736	0.33996	0.58949	0.299224	0.351342	0.293489	0.561758	0.390421	0.489456	0.400581	0.374078	0.344992	0.518772	0.49659	NaN	NaN	NaN	NaN
69.3543	-42.8917	0.440861	0.335545	0.607773	0.243536	0.343105	0.313855	0.525248	0.415101	0.469367	0.415572	0.362146	0.337991	0.573798	0.469099	NaN	NaN	NaN	NaN
69.3482	-42.8999	0.437607	0.327001	0.626014	0.243541	0.32453	0.313231	0.481416	0.473297	0.455923	0.435938	0.34117	0.330951	0.623393	0.447453	NaN	NaN	NaN	NaN
69.3441	-42.9054	0.444114	0.327179	0.613879	0.299243	0.31783	0.27139	0.494901	0.506934	0.456056	0.436046	0.331978	0.319917	0.633524	0.453291	NaN	NaN	NaN	NaN
69.338	-42.9136	0.460404	0.327618	0.602731	0.400503	0.315785	0.193417	0.55856	0.516256	0.476267	0.415976	0.320708	0.295958	0.651393	0.471008	NaN	NaN	NaN	NaN
69.3339	-42.9191	0.47348	0.327967	0.623454	0.413217	0.320647	0.167685	0.609571	0.492303	0.470783	0.400889	0.318629	0.285199	0.664518	0.482987	NaN	NaN	NaN	NaN
69.3278	-42.9274	0.48661	0.341045	0.638901	0.392378	0.329144	0.194707	0.641376	0.434748	0.439517	0.390919	0.330458	0.279019	0.67552	0.49518	NaN	NaN	NaN	NaN
69.3217	-42.9356	0.486613	0.349558	0.607148	0.403107	0.343933	0.253303	0.629619	0.367293	0.407266	0.401261	0.353678	0.285947	0.665758	0.50735	NaN	NaN	NaN	NaN
69.3177	-42.9411	0.48333	0.35373	0.568312	0.4132	0.354493	0.290411	0.608865	0.315954	0.387336	0.426892	0.37447	0.292771	0.642498	0.521276	NaN	NaN	NaN	NaN
69.3116	-42.9494	0.473496	0.366241	0.542503	0.367454	0.364535	0.327183	0.565747	0.264208	0.360412	0.467446	0.408948	0.306247	0.590273	0.542959	NaN	NaN	NaN	NaN
69.3075	-42.9549	0.470227	0.370414	0.574789	0.278581	0.367817	0.337613	0.536794	0.255365	0.359953	0.472149	0.427276	0.319549	0.548325	0.556666	NaN	NaN	NaN	NaN
69.3014	-42.9631	0.47023	0.370418	0.620176	0.234544	0.353293	0.337491	0.514941	0.255074	0.385453	0.461687	0.443425	0.3373	0.493198	0.560377	NaN	NaN	NaN	NaN
69.2973	-42.9686	0.47678	0.370612	0.581928	0.335185	0.342792	0.316419	0.52185	0.255005	0.411248	0.446306	0.45275	0.344058	0.466962	0.5464	NaN	NaN	NaN	NaN
69.2912	-42.9767	0.48663	0.3709	0.498835	0.513372	0.332398	0.290123	0.53597	0.263546	0.443785	0.420722	0.4575	0.352976	0.443361	NaN	NaN	NaN	NaN	NaN
69.2872	-42.9821	0.486633	0.370904	0.492406	0.558275	0.321543	0.295455	0.52893	0.280633	0.450523	0.415775	0.453008	0.357375	0.438136	NaN	NaN	NaN	NaN	NaN
69.2811	-42.9903	0.486636	0.370907	0.53113	0.514661	0.314297	0.311455	0.507761	0.297737	0.45077	0.431702	0.441752	0.359578	0.424907	NaN	NaN	NaN	NaN	NaN
69.2771	-42.9957	0.486639	0.370911	0.557025	0.447758	0.314037	0.327235	0.500704	0.297743	0.45078	0.442208	0.43725	0.357387	0.416914	NaN	NaN	NaN	NaN	NaN
69.271	-43.0038	0.476793	0.383458	0.569998	0.391713	0.309885	0.348083	0.500715	0.29775	0.45079	0.442217	0.430265	0.355066	0.414118	NaN	NaN	NaN	NaN	NaN
69.267	-43.0092	0.470248	0.383258	0.582346	0.369154	0.309627	0.353164	0.507796	0.289206	0.450682	0.447376	0.420953	0.354896	0.419279	NaN	NaN	NaN	NaN	NaN
69.2609	-43.0174	0.470251	0.370446	0.581384	0.368639	0.301743	0.363165	0.528991	0.263581	0.443844	0.446979	0.413684	0.354593	0.437577	NaN	NaN	NaN	NaN	NaN
69.2549	-43.0255	0.470253	0.370449	0.555531	0.379157	0.293885	0.37313	0.542934	0.237909	0.436904	0.430764	0.415431	0.354285	0.453206	NaN	NaN	NaN	NaN	NaN
69.2509	-43.0309	0.470256	0.366183	0.542326	0.389848	0.28617	0.383207	0.542589	0.220728	0.429968	0.425051	0.417314	0.356255	0.458346	NaN	NaN	NaN	NaN	NaN
69.2448	-43.039	0.463715	0.361739	0.534994	0.400279	0.282076	0.382629	0.534677	0.220406	0.403556	0.418943	0.41888	0.368982	0.447623	NaN	NaN	NaN	NaN	NaN
69.2408	-43.0444	0.457188	0.365816	0.521836	0.388493	0.289014	0.37704	0.519744	0.228581	0.396677	0.413247	0.418422	0.38183	0.429085	NaN	NaN	NaN	NaN	NaN
69.2348	-43.0524	0.447414	0.369791	0.502013	0.387524	0.299516	0.371454	0.4761	0.253419	0.389584	0.417764	0.422593	0.39039	0.39732	NaN	NaN	NaN	NaN	NaN
69.2307	-43.0577	0.440913	0.369601	0.501451	0.375975	0.310261	0.35557	0.454114	0.269895	0.395598	0.417466	0.431623	0.388259	0.378805	NaN	NaN	NaN	NaN	NaN
69.2247	-43.0658	0.431043	0.36506	0.500314	0.375226	0.324554	0.334416	0.417739	0.294511	0.420636	0.406876	0.445198	0.370853	0.375952	NaN	NaN	NaN	NaN	NaN
69.2207	-43.0711	0.421118	0.36904	0.486979	0.38557	0.335259	0.323851	0.396045	0.319398	0.413975	0.406587	0.447269	0.359826	0.388915	NaN	NaN	NaN	NaN	NaN
69.2147	-43.0792	0.407939	0.385692	0.467872	0.362786	0.341917	0.328764	0.388647	0.335998	0.362527	0.431619	0.439994	0.361683	0.404545	NaN	NaN	NaN	NaN	NaN
69.2107	-43.0846	0.404659	0.38986	0.455144	0.373502	0.338061	0.339066	0.402918	0.327765	0.324212	0.451815	0.435294	0.365911	0.41244	NaN	NaN	NaN	NaN	NaN
69.2047	-43.0926	0.417825	0.394533	0.424633	0.428955	0.335132	0.334323	0.431934	0.303089	0.324581	0.447094	0.419368	0.383197	0.417898	NaN	NaN	NaN	NaN	NaN
69.2007	-43.0979	0.434365	0.399326	0.419712	0.46349	0.325192	0.329686	0.439699	0.295087	0.350638	0.432393	0.39897	0.402664	0.415461	NaN	NaN	NaN	NaN	NaN
69.1948	-43.106	0.457205	0.400052	0.453418	0.466427	0.300779	0.340928	0.440759	0.278756	0.376887	0.44896	0.36057	0.433004	0.397297	NaN	NaN	NaN	NaN	NaN
69.1888	-43.114	0.470287	0.387595	0.505212	0.389739	0.293581	0.367499	0.43432	0.253609	0.383442	0.501374	0.34287	0.43763	0.373703	NaN	NaN	NaN	NaN	NaN
69.1848	-43.1193	0.463745	0.383119	0.517271	0.367104	0.293197	0.383033	0.419953	0.253461	0.389676	0.522168	0.359271	0.411934	0.376285	NaN	NaN	NaN	NaN	NaN
69.1788	-43.1272	0.437666	0.390891	0.509106	0.365837	0.292286	0.371386	0.433051	0.26987	0.389134	0.516327	0.388994	0.370714	0.407593	NaN	NaN	NaN	NaN	NaN
69.1749	-43.1325	0.417847	0.40312	0.501842	0.376264	0.291896	0.349815	0.44631	0.294854	0.369646	0.494862	0.404557	0.355318	0.43104	NaN	NaN	NaN	NaN	NaN
69.1689	-43.1405	0.404698	0.415553	0.501566	0.420726	0.284873	0.334111	0.424564	0.336703	0.324737	0.468038	0.419829	0.34635	0.454456	NaN	NaN	NaN	NaN	NaN
69.1649	-43.1457	0.414558	0.415878	0.528082	0.422283	0.270899	0.339793	0.396567	0.353651	0.305693	0.457549	0.417282	0.350534	0.459661	NaN	NaN	NaN	NaN	NaN
69.1589	-43.1537	0.450689	0.399884	0.57546	0.357544	0.264395	0.361816	0.354948	0.37107	0.312635	0.442758	0.389863	0.367612	0.459668	NaN	NaN	NaN	NaN	NaN
69.1549	-43.159	0.473573	0.383448	0.569943	0.346623	0.271981	0.367558	0.355423	0.371545	0.325858	0.443411	0.369517	0.376194	0.457076	NaN	NaN	NaN	NaN	NaN
69.1489	-43.1669	0.48671	0.366725	0.537575	0.357016	0.290164	0.367705	0.384246	0.346594	0.332484	0.454168	0.381429	0.363615	0.438749	NaN	NaN	NaN	NaN	NaN
69.1449	-43.1723	0.480141	0.36227	0.523793	0.356141	0.304441	0.362257	0.398351	0.329593	0.332308	0.459168	0.404519	0.353127	0.425703	NaN	NaN	NaN	NaN	NaN
69.1388	-43.1802	0.457231	0.36162	0.528183	0.321525	0.318109	0.345661	0.4116	0.320522	0.325238	0.468683	0.413331	0.350843	0.454686	NaN	NaN	NaN	NaN	NaN
69.1348	-43.1855	0.437685	0.365317	0.545953	0.287785	0.321107	0.334553	0.403606	0.336773	0.318378	0.467994	0.408242	0.346096	0.493925	NaN	NaN	NaN	NaN	NaN
69.1288	-43.1935	0.414593	0.377421	0.563953	0.24314	0.320383	0.328632	0.381399	0.352701	0.311345	0.456696	0.407462	0.326015	0.522047	NaN	NaN	NaN	NaN	NaN
69.1227	-43.2015	0.404742	0.394188	0.557868	0.220937	0.312685	0.33339	0.395247	0.327269	0.304597	0.450952	0.409293	0.314918	0.492468	NaN	NaN	NaN	NaN	NaN
69.1187	-43.2068	0.411312	0.394396	0.54567	0.24315	0.301869	0.338534	0.409508	0.327482	0.292004	0.445786	0.40922	0.306177	0.476397	NaN	NaN	NaN	NaN	NaN
69.1127	-43.2148	0.434405	0.386561	0.521504	0.310092	0.276889	0.354364	0.431365	0.319657	0.273253	0.456376	0.402631	0.291011	0.457654	NaN	NaN	NaN	NaN	NaN
69.1087	-43.2201	0.457235	0.374454	0.509822	0.343931	0.266396	0.359939	0.438979	0.320052	0.26078	0.472176	0.398416	0.284621	0.444494	NaN	NaN	NaN	NaN	NaN
69.1026	-43.2281	0.490018	0.345541	0.523576	0.367228	0.259812	0.355358	0.418124	0.3456	0.273889	0.478094	0.396656	0.291393	0.434388	NaN	NaN	NaN	NaN	NaN
69.0986	-43.2334	0.499908	0.333044	0.549404	0.356742	0.267595	0.345471	0.37562	0.370725	0.299538	0.483781	0.392421	0.311117	0.43494	NaN	NaN	NaN	NaN	NaN
69.0926	-43.2414	0.483438	0.349634	0.594392	0.324023	0.290352	0.30951	0.311589	0.386836	0.350427	0.489358	0.392726	0.335293	0.456745	NaN	NaN	NaN	NaN	NaN
69.0885	-43.2467	0.453973	0.374377	0.612846	0.31277	0.305187	0.29395	0.283082	0.360984	0.394621	0.484162	0.399602	0.337575	0.472759	NaN	NaN	NaN	NaN	NaN
69.0825	-43.2547	0.414623	0.385974	0.60976	0.333833	0.322911	0.30434	0.254611	0.301503	0.444613	0.468213	0.401462	0.335168	0.453972	NaN	NaN	NaN	NaN	NaN
69.0785	-43.2599	0.408064	0.372997	0.601605	0.343989	0.318464	0.335436	0.247505	0.267764	0.450365	0.462567	0.394152	0.336981	0.424626	NaN	NaN	NaN	NaN	NaN
69.0724	-43.2679	0.431109	0.335465	0.607356	0.288006	0.302753	0.387052	0.247511	0.259362	0.424641	0.487942	0.375696	0.334426	0.416338	NaN	NaN	NaN	NaN	NaN
69.0684	-43.2732	0.457255	0.302363	0.639525	0.244094	0.284351	0.407642	0.261745	0.267949	0.393042	0.518863	0.366764	0.327903	0.434661	NaN	NaN	NaN	NaN	NaN
69.0623	-43.2811	0.490041	0.273674	0.685891	0.25647	0.244914	0.407651	0.290245	0.302017	0.336375	0.555132	0.362578	0.332449	0.453415	NaN	NaN	NaN	NaN	NaN
69.0563	-43.2891	0.493335	0.290585	0.661899	0.335327	0.234624	0.381922	0.311645	0.353036	0.298821	0.571186	0.360693	0.347951	0.451335	NaN	NaN	NaN	NaN	NaN
69.0522	-43.2944	0.470332	0.332315	0.617669	0.35716	0.256724	0.361303	0.333066	0.353388	0.311889	0.566696	0.356348	0.358965	0.44373	NaN	NaN	NaN	NaN	NaN
69.0462	-43.3024	0.431129	0.395063	0.554113	0.344693	0.304167	0.335464	0.354513	0.336781	0.376161	0.521233	0.354176	0.367755	0.433379	NaN	NaN	NaN	NaN	NaN
69.0421	-43.3077	0.427836	0.403524	0.535105	0.310802	0.329569	0.32512	0.354521	0.336789	0.427638	0.475245	0.35643	0.367761	0.433386	NaN	NaN	NaN	NaN	NaN
69.0361	-43.3156	0.457269	0.353191	0.566395	0.255275	0.344044	0.319947	0.354529	0.31139	0.50462	0.41361	0.360858	0.369901	0.43868	NaN	NaN	NaN	NaN	NaN
69.0321	-43.3209	0.476915	0.315532	0.610563	0.233439	0.329431	0.325008	0.361566	0.277563	0.542775	0.387736	0.360658	0.371938	0.449176	NaN	NaN	NaN	NaN	NaN
69.026	-43.3288	0.467079	0.311065	0.673809	0.234118	0.300463	0.319464	0.382637	0.252223	0.529416	0.397705	0.353529	0.371633	0.467421	NaN	NaN	NaN	NaN	NaN
69.022	-43.3341	0.440984	0.331528	0.70505	0.256797	0.282353	0.308764	0.403687	0.252229	0.477881	0.438584	0.34661	0.367121	0.475125	NaN	NaN	NaN	NaN	NaN
69.016	-43.342	0.431144	0.335489	0.710738	0.335384	0.249544	0.308414	0.403268	0.277328	0.394376	0.494369	0.346485	0.356128	0.472152	NaN	NaN	NaN	NaN	NaN
69.0119	-43.3472	0.454009	0.306538	0.684855	0.402279	0.234877	0.318745	0.389002	0.294041	0.362341	0.509361	0.350971	0.353956	0.456264	NaN	NaN	NaN	NaN	NaN
69.0059	-43.3551	0.483501	0.281951	0.634336	0.435029	0.227243	0.307686	0.409594	0.302206	0.387764	0.473218	0.359862	0.366986	0.411618	NaN	NaN	NaN	NaN	NaN
69.0019	-43.3603	0.480218	0.294512	0.609255	0.412111	0.230554	0.28101	0.436907	0.318694	0.438848	0.41675	0.366432	0.379968	0.385405	NaN	NaN	NaN	NaN	NaN
68.9959	-43.3682	0.454032	0.327654	0.570644	0.399703	0.237225	0.285717	0.429162	0.335037	0.444874	0.390628	0.370538	0.388421	0.377461	NaN	NaN	NaN	NaN	NaN
68.99	-43.376	0.427865	0.360867	0.538571	0.398685	0.247777	0.322259	0.37305	0.317877	0.367452	0.44583	0.379307	0.373065	0.398201	NaN	NaN	NaN	NaN	NaN
68.986	-43.3812	0.427868	0.36087	0.532176	0.365003	0.262106	0.338052	0.359244	0.292749	0.328997	0.475914	0.383767	0.362185	0.411177	NaN	NaN	NaN	NaN	NaN
68.9801	-43.3889	0.457296	0.327758	0.54531	0.309817	0.280358	0.343745	0.366868	0.242745	0.341653	0.465701	0.385999	0.355663	0.41896	NaN	NaN	NaN	NaN	NaN
68.9761	-43.3941	0.480222	0.307196	0.565225	0.310585	0.273604	0.34416	0.38152	0.217885	0.373777	0.440666	0.381557	0.35567	0.421603	NaN	NaN	NaN	NaN	NaN
68.9702	-43.4018	0.49339	0.311743	0.592675	0.356902	0.238017	0.349863	0.403493	0.218368	0.419399	0.411107	0.372954	0.358059	0.424469	NaN	NaN	NaN	NaN	NaN
68.9663	-43.407	0.483518	0.332696	0.599831	0.379982	0.223672	0.355295	0.403788	0.235395	0.445594	0.40673	0.368864	0.36268	0.427421	NaN	NaN	NaN	NaN	NaN
68.9603	-43.4147	0.454049	0.365916	0.593037	0.368357	0.230803	0.371045	0.36117	0.277312	0.471464	0.433254	0.362656	0.373953	0.425309	NaN	NaN	NaN	NaN	NaN
68.9564	-43.4198	0.434477	0.3824	0.579464	0.356419	0.24141	0.37076	0.339531	0.302185	0.471202	0.459095	0.362872	0.382851	0.420322	NaN	NaN	NaN	NaN	NaN
68.9505	-43.4275	0.411455	0.390241	0.571406	0.332967	0.251637	0.364756	0.331709	0.301499	0.451008	0.499596	0.369673	0.38728	0.423098	NaN	NaN	NaN	NaN	NaN
68.9465	-43.4326	0.404912	0.390042	0.557903	0.332327	0.251175	0.364182	0.331249	0.292706	0.437555	0.50912	0.383189	0.378601	0.430913	NaN	NaN	NaN	NaN	NaN
68.9406	-43.4403	0.404917	0.390046	0.519451	0.364708	0.247143	0.368871	0.323805	0.292328	0.443443	0.472393	0.398606	0.374088	0.438635	NaN	NaN	NaN	NaN	NaN
68.9366	-43.4454	0.404922	0.390049	0.506665	0.375478	0.243344	0.37911	0.316721	0.292237	0.46251	0.431144	0.38891	0.388846	0.438511	NaN	NaN	NaN	NaN	NaN
68.9307	-43.4531	0.404927	0.390053	0.500284	0.353023	0.246696	0.389335	0.330915	0.275643	0.462521	0.389729	0.372191	0.414162	0.430458	NaN	NaN	NaN	NaN	NaN
68.9247	-43.4608	0.404932	0.390056	0.500293	0.341914	0.250267	0.378812	0.366188	0.242314	0.411245	0.41468	0.374194	0.420528	0.419899	NaN	NaN	NaN	NaN	NaN
68.9207	-43.466	0.411481	0.381727	0.500303	0.375282	0.239571	0.368302	0.380137	0.225534	0.385505	0.445022	0.374202	0.418355	0.422504	NaN	NaN	NaN	NaN	NaN
68.9147	-43.4738	0.421333	0.369232	0.500312	0.464514	0.222008	0.347722	0.38711	0.208769	0.378915	0.465341	0.371987	0.411824	0.430305	NaN	NaN	NaN	NaN	NaN
68.9106	-43.479	0.421337	0.373493	0.500611	0.520747	0.211538	0.332371	0.387119	0.208774	0.385292	0.470645	0.374445	0.398934	0.438103	NaN	NaN	NaN	NaN	NaN
68.9046	-43.4868	0.42134	0.390568	0.495372	0.555283	0.204706	0.338174	0.352278	0.23394	0.404781	0.476572	0.379591	0.373293	0.437975	NaN	NaN	NaN	NaN	NaN
68.9005	-43.4921	0.421344	0.407696	0.483685	0.53336	0.215819	0.349141	0.317345	0.250742	0.430588	0.482501	0.380127	0.36059	0.430106	NaN	NaN	NaN	NaN	NaN
68.8945	-43.4999	0.421347	0.429188	0.472205	0.444262	0.248673	0.349706	0.289352	0.250748	0.494609	0.494128	0.374096	0.34796	0.427603	NaN	NaN	NaN	NaN	NaN
68.8903	-43.5053	0.421351	0.429192	0.478644	0.377254	0.27407	0.344703	0.289455	0.242439	0.526698	0.494753	0.367522	0.350244	0.425099	NaN	NaN	NaN	NaN	NaN
68.8842	-43.5132	0.421354	0.403413	0.515545	0.332565	0.292126	0.339556	0.310801	0.217474	0.539551	0.468958	0.378876	0.356896	0.414752	NaN	NaN	NaN	NaN	NaN
68.8802	-43.5184	0.421358	0.377764	0.539436	0.365733	0.284836	0.344719	0.317928	0.217544	0.533302	0.448155	0.394772	0.357051	0.406957	NaN	NaN	NaN	NaN	NaN
68.8741	-43.5263	0.421361	0.352246	0.537554	0.465122	0.259239	0.365319	0.339299	0.217767	0.514511	0.453367	0.401797	0.357253	0.396555	NaN	NaN	NaN	NaN	NaN
68.8701	-43.5315	0.421365	0.348008	0.518073	0.508893	0.24813	0.380742	0.346435	0.226256	0.501975	0.474198	0.395167	0.357308	0.393958	NaN	NaN	NaN	NaN	NaN
68.864	-43.5393	0.421368	0.348011	0.505326	0.486008	0.243987	0.406402	0.325068	0.276534	0.470305	0.500018	0.386137	0.355081	0.391244	NaN	NaN	NaN	NaN	NaN
68.858	-43.547	0.421372	0.348014	0.543658	0.375815	0.23985	0.432004	0.289488	0.326609	0.425541	0.530527	0.374573	0.350477	0.388332	NaN	NaN	NaN	NaN	NaN
68.854	-43.5522	0.421375	0.348017	0.575718	0.320964	0.2288	0.43677	0.275093	0.359864	0.431956	0.520252	0.362947	0.34801	0.388063	NaN	NaN	NaN	NaN	NaN
68.848	-43.5599	0.421379	0.34802	0.575729	0.376765	0.199863	0.425702	0.274608	0.367684	0.508442	0.448323	0.357922	0.334549	0.395409	NaN	NaN	NaN	NaN	NaN
68.8439	-43.5651	0.421382	0.348023	0.550099	0.465408	0.189187	0.404799	0.281408	0.33382	0.526789	0.422021	0.368904	0.323529	0.40298	NaN	NaN	NaN	NaN	NaN
68.8379	-43.5728	0.421386	0.352268	0.524843	0.565514	0.186028	0.358212	0.316401	0.258437	0.480755	0.456708	0.38215	0.314742	0.407989	NaN	NaN	NaN	NaN	NaN
68.8339	-43.5779	0.427956	0.352461	0.52546	0.577365	0.193664	0.32737	0.337552	0.233477	0.467859	0.492635	0.373238	0.312574	0.410584	NaN	NaN	NaN	NaN	NaN
68.8279	-43.5856	0.437828	0.352742	0.545628	0.500308	0.226907	0.307327	0.338057	0.250557	0.507111	0.504573	0.341935	0.31258	0.418492	NaN	NaN	NaN	NaN	NaN
68.8239	-43.5908	0.43783	0.361252	0.546271	0.444616	0.248859	0.318251	0.31734	0.284342	0.546575	0.479997	0.330852	0.308327	0.418499	NaN	NaN	NaN	NaN	NaN
68.8179	-43.5985	0.437832	0.369781	0.521182	0.388157	0.277748	0.339521	0.310784	0.310006	0.567056	0.44459	0.344909	0.29785	0.408149	NaN	NaN	NaN	NaN	NaN
68.8139	-43.6037	0.437834	0.369785	0.501937	0.354088	0.28811	0.354984	0.325033	0.301783	0.567229	0.434265	0.365665	0.29166	0.3952	NaN	NaN	NaN	NaN	NaN
68.8079	-43.6114	0.42797	0.373761	0.488575	0.320006	0.287179	0.359266	0.367048	0.284934	0.554023	0.423429	0.397656	0.28763	0.38228	NaN	NaN	NaN	NaN	NaN
68.8039	-43.6165	0.42141	0.369299	0.500528	0.297635	0.28309	0.353433	0.401967	0.259667	0.534256	0.42282	0.411096	0.294175	0.379771	NaN	NaN	NaN	NaN	NaN
68.7979	-43.6242	0.411585	0.356258	0.537101	0.27546	0.271767	0.347475	0.429542	0.225882	0.507656	0.432172	0.426665	0.300681	0.387766	NaN	NaN	NaN	NaN	NaN
68.7919	-43.6319	0.405059	0.347593	0.554997	0.286414	0.257049	0.357407	0.422134	0.21727	0.487853	0.436604	0.446997	0.294268	0.400957	NaN	NaN	NaN	NaN	NaN
68.7879	-43.6371	0.405064	0.347596	0.54223	0.330472	0.246264	0.352015	0.421838	0.225527	0.474913	0.441467	0.451461	0.294273	0.40624	NaN	NaN	NaN	NaN	NaN
68.7819	-43.6448	0.405069	0.347599	0.529482	0.396764	0.232011	0.325818	0.435272	0.250458	0.449345	0.472122	0.430815	0.300531	0.406077	NaN	NaN	NaN	NaN	NaN
68.7779	-43.6499	0.411602	0.339316	0.516736	0.440854	0.224877	0.315358	0.449148	0.250464	0.442966	0.482383	0.414723	0.302459	0.405869	NaN	NaN	NaN	NaN	NaN
68.7719	-43.6576	0.424709	0.322755	0.49765	0.518115	0.210579	0.315365	0.449158	0.250469	0.442976	0.466835	0.409869	0.295719	0.402895	NaN	NaN	NaN	NaN	NaN
68.7679	-43.6627	0.43128	0.314487	0.50402	0.540728	0.199839	0.32584	0.449494	0.233861	0.455768	0.451532	0.412105	0.289198	0.397505	NaN	NaN	NaN	NaN	NaN
68.7618	-43.6704	0.437856	0.306219	0.52314	0.552779	0.189163	0.331228	0.456939	0.234089	0.468994	0.426181	0.423664	0.280704	0.392289	NaN	NaN	NaN	NaN	NaN
68.7577	-43.6756	0.437858	0.306222	0.535908	0.542163	0.192935	0.321024	0.456949	0.250901	0.475686	0.410957	0.430608	0.27865	0.395013	NaN	NaN	NaN	NaN	NaN
68.7517	-43.6833	0.43786	0.306224	0.561468	0.49845	0.200312	0.321289	0.464405	0.251155	0.488952	0.385544	0.428305	0.285147	0.403007	NaN	NaN	NaN	NaN	NaN
68.7476	-43.6885	0.437863	0.310441	0.581019	0.432236	0.214877	0.326811	0.457803	0.251324	0.495671	0.375464	0.421463	0.282893	0.410788	NaN	NaN	NaN	NaN	NaN
68.7415	-43.6962	0.431293	0.331405	0.594898	0.332588	0.247695	0.327484	0.422996	0.27659	0.489696	0.380848	0.42403	0.254769	0.42619	NaN	NaN	NaN	NaN	NaN
68.7375	-43.7014	0.424732	0.34394	0.595252	0.299255	0.262261	0.333024	0.402078	0.301886	0.464418	0.391146	0.431063	0.230995	0.441664	NaN	NaN	NaN	NaN	NaN
68.7314	-43.7091	0.411641	0.360557	0.582407	0.276678	0.276568	0.343573	0.388119	0.327204	0.413438	0.432187	0.412807	0.228668	0.454532	NaN	NaN	NaN	NaN	NaN
68.7253	-43.7168	0.405122	0.36887	0.550344	0.287085	0.276055	0.332488	0.422889	0.343994	0.35586	0.483232	0.3783	0.256442	0.430854	NaN	NaN	NaN	NaN	NaN
68.7212	-43.722	0.405127	0.368873	0.531145	0.297747	0.268423	0.310965	0.464322	0.360663	0.330268	0.503524	0.362152	0.271369	0.404565	NaN	NaN	NaN	NaN	NaN
68.7151	-43.7297	0.405132	0.368877	0.505598	0.319304	0.249771	0.315322	0.477498	0.393956	0.298308	0.528856	0.352935	0.284234	0.362625	NaN	NaN	NaN	NaN	NaN
68.7111	-43.7348	0.405137	0.36888	0.499229	0.330227	0.238758	0.335844	0.456376	0.410588	0.285543	0.538982	0.352942	0.295096	0.331328	NaN	NaN	NaN	NaN	NaN
68.7051	-43.7425	0.41493	0.356417	0.499238	0.330234	0.235093	0.356651	0.428477	0.418902	0.298321	0.528879	0.364481	0.306193	0.297567	NaN	NaN	NaN	NaN	NaN
68.7011	-43.7476	0.424754	0.348203	0.493161	0.352429	0.235322	0.362202	0.421847	0.402297	0.323896	0.513834	0.378415	0.295628	0.305511	NaN	NaN	NaN	NaN	NaN
68.6951	-43.7552	0.434603	0.35273	0.48793	0.375252	0.235884	0.352454	0.443647	0.352383	0.381538	0.483783	0.394829	0.263402	0.360504	NaN	NaN	NaN	NaN	NaN
68.6911	-43.7602	0.437886	0.361338	0.48239	0.386781	0.236222	0.337133	0.472148	0.319044	0.420051	0.458485	0.40417	0.246189	0.397206	NaN	NaN	NaN	NaN	NaN
68.6851	-43.7678	0.431322	0.378214	0.489354	0.40974	0.233085	0.332425	0.49409	0.252044	0.451937	0.458829	0.397465	0.246193	0.41564	NaN	NaN	NaN	NaN	NaN
68.6811	-43.7729	0.418215	0.390639	0.508321	0.421356	0.226019	0.33783	0.487304	0.226811	0.451682	0.479443	0.379104	0.263381	0.405207	NaN	NaN	NaN	NaN	NaN
68.675	-43.7805	0.398659	0.398571	0.532797	0.443772	0.218836	0.337837	0.465893	0.243462	0.451559	0.479332	0.376726	0.27201	0.386877	NaN	NaN	NaN	NaN	NaN
68.671	-43.7855	0.392169	0.389818	0.54438	0.443329	0.222333	0.337708	0.451474	0.260086	0.470706	0.458746	0.399722	0.254915	0.381621	NaN	NaN	NaN	NaN	NaN
68.665	-43.7931	0.388934	0.372674	0.536403	0.430801	0.236362	0.321539	0.457639	0.27651	0.470296	0.437613	0.431604	0.239925	0.378997	NaN	NaN	NaN	NaN	NaN
68.659	-43.8008	0.392181	0.351536	0.54791	0.363581	0.250196	0.32627	0.442923	0.284472	0.424897	0.4416	0.442344	0.250638	0.379003	NaN	NaN	NaN	NaN	NaN
68.655	-43.8059	0.39868	0.334792	0.560021	0.319203	0.253399	0.34159	0.421619	0.275797	0.405228	0.445994	0.444144	0.26134	0.379009	NaN	NaN	NaN	NaN	NaN
68.6489	-43.8135	0.405196	0.339198	0.541871	0.297038	0.24949	0.346406	0.407143	0.267041	0.417401	0.424957	0.445846	0.280695	0.371246	NaN	NaN	NaN	NaN	NaN
68.6449	-43.8186	0.405201	0.347679	0.529746	0.308125	0.242271	0.341032	0.399765	0.275164	0.436306	0.409566	0.443366	0.295813	0.36615	NaN	NaN	NaN	NaN	NaN
68.6388	-43.8263	0.405206	0.347682	0.529755	0.352515	0.228039	0.335808	0.385469	0.266511	0.461312	0.409575	0.434143	0.310885	0.366275	NaN	NaN	NaN	NaN	NaN
68.6347	-43.8314	0.405211	0.347685	0.536145	0.363832	0.220913	0.335815	0.385478	0.249782	0.473803	0.419923	0.427403	0.313023	0.366281	NaN	NaN	NaN	NaN	NaN
68.6287	-43.839	0.405216	0.347688	0.555326	0.375544	0.206636	0.320128	0.406281	0.249787	0.473814	0.445803	0.418602	0.310897	0.366287	NaN	NaN	NaN	NaN	NaN
68.6246	-43.8441	0.40522	0.347691	0.555336	0.397854	0.199485	0.309687	0.405979	0.266358	0.480208	0.461468	0.409707	0.310902	0.366292	NaN	NaN	NaN	NaN	NaN
68.6186	-43.8518	0.405225	0.347693	0.523402	0.452533	0.199489	0.299247	0.398628	0.291177	0.505777	0.477524	0.389487	0.315173	0.366298	NaN	NaN	NaN	NaN	NaN
68.6145	-43.8568	0.398724	0.355999	0.497925	0.496153	0.192149	0.299006	0.41246	0.291183	0.524979	0.483092	0.373633	0.31722	0.368858	NaN	NaN	NaN	NaN	NaN
68.6085	-43.8644	0.382357	0.368273	0.484642	0.506236	0.191885	0.309054	0.419375	0.266093	0.556506	0.472952	0.362103	0.319171	0.371335	NaN	NaN	NaN	NaN	NaN
68.6044	-43.8695	0.371813	0.372263	0.490421	0.494856	0.1917	0.31401	0.412164	0.265927	0.54977	0.462224	0.370975	0.316954	0.373891	NaN	NaN	NaN	NaN	NaN
68.5984	-43.8771	0.357763	0.384676	0.496479	0.47262	0.187869	0.313611	0.41171	0.290704	0.473123	0.460806	0.397734	0.31261	0.373814	NaN	NaN	NaN	NaN	NaN
68.5923	-43.8847	0.357769	0.384679	0.509187	0.417592	0.187596	0.323622	0.404507	0.307218	0.390391	0.448906	0.424135	0.314653	0.371109	NaN	NaN	NaN	NaN	NaN
68.5883	-43.8898	0.364792	0.376345	0.521916	0.395833	0.180303	0.333748	0.390426	0.323715	0.35866	0.438016	0.432727	0.316693	0.376293	NaN	NaN	NaN	NaN	NaN
68.5822	-43.8974	0.385781	0.351414	0.528294	0.384943	0.183954	0.3339	0.362422	0.340081	0.371244	0.427857	0.428042	0.320905	0.378887	NaN	NaN	NaN	NaN	NaN
68.5782	-43.9025	0.398762	0.334833	0.528303	0.384951	0.19126	0.334194	0.334564	0.339849	0.415466	0.43874	0.410264	0.325209	0.376305	NaN	NaN	NaN	NaN	NaN
68.5721	-43.9101	0.411777	0.318294	0.528313	0.396054	0.205992	0.319267	0.313726	0.323054	0.504159	0.491763	0.363609	0.331737	0.368543	NaN	NaN	NaN	NaN	NaN
69.6437	-44.8165	0.5852	0.546947	0.389555	0.615865	0.38147	0.432666	0.490672	0.496351	0.667885	0.378565	NaN	NaN	NaN	NaN	NaN	NaN	NaN	NaN
69.6453	-44.8051	0.585201	0.546947	0.389556	0.673621	0.351422	0.443191	0.468392	0.495861	0.694015	0.362479	NaN	NaN	NaN	NaN	NaN	NaN	NaN	NaN
69.6473	-44.7898	0.575144	0.555404	0.39595	0.662061	0.32444	0.463898	0.460498	0.477762	0.712987	0.367581	NaN	NaN	NaN	NaN	NaN	NaN	NaN	NaN
69.6488	-44.7783	0.561773	0.559322	0.415102	0.581276	0.327393	0.479354	0.452753	0.459819	0.738727	0.367447	NaN	NaN	NaN	NaN	NaN	NaN	NaN	NaN
69.6508	-44.7629	0.545116	0.563108	0.44059	0.477773	0.330046	0.483539	0.473916	0.433192	0.750931	0.367117	NaN	NaN	NaN	NaN	NaN	NaN	NaN	NaN
69.6529	-44.7476	0.525211	0.56235	0.445819	0.453804	0.325331	0.487683	0.494992	0.415346	0.749946	0.356027	NaN	NaN	NaN	NaN	NaN	NaN	NaN	NaN
69.6545	-44.7361	0.511992	0.561839	0.431805	0.452562	0.332133	0.481597	0.501613	0.423616	0.722868	0.371589	NaN	NaN	NaN	NaN	NaN	NaN	NaN	NaN
69.6566	-44.7206	0.502108	0.552651	0.417641	0.371501	0.37185	0.459429	0.5299	0.414595	0.69569	0.387034	NaN	NaN	NaN	NaN	NaN	NaN	NaN	NaN
69.6587	-44.705	0.502109	0.543866	0.417209	0.246833	0.418952	0.432372	0.536445	0.431528	0.688747	0.397481	NaN	NaN	NaN	NaN	NaN	NaN	NaN	NaN
69.6602	-44.6932	0.511995	0.53108	0.436787	0.258452	0.404498	0.426967	0.543605	0.431527	0.688746	0.39748	NaN	NaN	NaN	NaN	NaN	NaN	NaN	NaN
69.6622	-44.6775	0.525216	0.514045	0.482583	0.372927	0.342694	0.443188	0.52211	0.440209	0.695529	0.38696	NaN	NaN	NaN	NaN	NaN	NaN	NaN	NaN
69.6643	-44.6618	0.541799	0.492781	0.515395	0.430917	0.31368	0.459744	0.508209	0.457945	0.696303	0.381981	NaN	NaN	NaN	NaN	NaN	NaN	NaN	NaN
69.6659	-44.65	0.551783	0.493118	0.489901	0.419287	0.332404	0.465634	0.494132	0.484282	0.683792	0.37685	NaN	NaN	NaN	NaN	NaN	NaN	NaN	NaN
69.668	-44.6343	0.551784	0.501861	0.444467	0.338617	0.383842	0.471384	0.501895	0.537107	0.645369	0.377129	NaN	NaN	NaN	NaN	NaN	NaN	NaN	NaN
69.6696	-44.6224	0.548453	0.519255	0.405848	0.281497	0.424314	0.455557	0.531275	0.53766	0.625965	0.371852	NaN	NaN	NaN	NaN	NaN	NaN	NaN	NaN
69.6716	-44.6065	0.535166	0.545116	0.38663	0.360692	0.410129	0.445001	0.560685	0.503238	0.645916	0.356022	NaN	NaN	NaN	NaN	NaN	NaN	NaN	NaN
69.6737	-44.5906	0.535167	0.549513	0.399918	0.463759	0.377764	0.429143	0.590125	0.468777	0.659227	0.350802	0.488788	0.353007	NaN	NaN	NaN	NaN	NaN	NaN
69.6753	-44.5788	0.535168	0.562729	0.407088	0.476062	0.359443	0.429143	0.612222	0.451642	0.652712	0.36684	0.481897	0.355226	NaN	NaN	NaN	NaN	NaN	NaN
69.6775	-44.5629	0.535169	0.567143	0.433571	0.44277	0.352104	0.429142	0.619593	0.486729	0.62011	0.388235	0.472703	0.366329	NaN	NaN	NaN	NaN	NaN	NaN
69.6796	-44.547	0.535169	0.567143	0.453317	0.466303	0.333728	0.41828	0.633981	0.52174	0.620633	0.383162	0.465802	0.377436	NaN	NaN	NaN	NaN	NaN	NaN
69.6811	-44.535	0.53517	0.567143	0.453318	0.500751	0.322683	0.402005	0.655534	0.512981	0.627163	0.399225	0.458897	0.384101	NaN	NaN	NaN	NaN	NaN	NaN
69.6832	-44.519	0.535171	0.549514	0.458979	0.546028	0.311372	0.41258	0.633428	0.486368	0.633015	0.430989	0.456593	0.390767	NaN	NaN	NaN	NaN	NaN	NaN
69.6852	-44.503	0.535172	0.536323	0.451721	0.53356	0.318369	0.42842	0.596628	0.468301	0.638703	0.46264	0.456592	0.397435	NaN	NaN	NaN	NaN	NaN	NaN
69.6869	-44.4907	0.525229	0.535963	0.444475	0.486807	0.347748	0.42842	0.57457	0.459223	0.644791	0.462383	0.463497	0.397434	NaN	NaN	NaN	NaN	NaN	NaN
69.6891	-44.4747	0.518618	0.526939	0.44357	0.394792	0.391597	0.428419	0.545186	0.476183	0.671072	0.409043	0.481891	0.397433	0.504291	NaN	NaN	NaN	NaN	NaN
69.6912	-44.4587	0.518619	0.50943	0.442651	0.337396	0.424315	0.428419	0.545185	0.511057	0.69161	0.350737	0.491073	0.399655	0.49092	NaN	NaN	NaN	NaN	NaN
69.6928	-44.4466	0.51862	0.500697	0.44871	0.348554	0.428115	0.439414	0.523623	0.545963	0.705528	0.32438	0.495872	0.399771	0.482976	NaN	NaN	NaN	NaN	NaN
69.6948	-44.4305	0.531859	0.48372	0.448711	0.439298	0.414267	0.434568	0.52407	0.563857	0.706283	0.335369	0.491624	0.393288	0.477678	NaN	NaN	NaN	NaN	NaN
69.6964	-44.4183	0.538495	0.479589	0.455472	0.496655	0.400165	0.435006	0.539232	0.56456	0.673672	0.346074	0.496495	0.391212	0.46973	NaN	NaN	NaN	NaN	NaN
69.6986	-44.4022	0.551799	0.480039	0.449878	0.577361	0.371178	0.440731	0.569162	0.539249	0.647553	0.346073	0.5036	0.386872	0.46708	NaN	NaN	NaN	NaN	NaN
69.7007	-44.386	0.565139	0.480486	0.450806	0.578441	0.356477	0.457068	0.584401	0.522368	0.627943	0.36749	0.487293	0.388986	0.456292	NaN	NaN	NaN	NaN	NaN
69.7023	-44.3738	0.568483	0.489323	0.444941	0.556019	0.345027	0.472952	0.606547	0.496444	0.614603	0.383428	0.470782	0.390986	0.448097	NaN	NaN	NaN	NaN	NaN
69.7044	-44.3574	0.568484	0.502441	0.452186	0.476706	0.337003	0.499378	0.599161	0.487555	0.601021	0.388504	0.442199	0.408187	0.442523	NaN	NaN	NaN	NaN	NaN
69.7065	-44.3411	0.558465	0.515235	0.452187	0.41949	0.347739	0.488158	0.605869	0.469687	0.600382	0.377454	0.4394	0.405641	0.450271	NaN	NaN	NaN	NaN	NaN
69.7081	-44.3288	0.551804	0.523764	0.452188	0.373806	0.362384	0.46641	0.612558	0.460595	0.599864	0.377181	0.434425	0.405395	0.45543	NaN	NaN	NaN	NaN	NaN
69.7103	-44.3124	0.538502	0.536452	0.458531	0.328203	0.361793	0.45494	0.618871	0.451288	0.592446	0.38737	0.431751	0.389624	0.479071	0.493881	0.468208	NaN	NaN	NaN
69.7125	-44.2959	0.525242	0.535966	0.470712	0.305163	0.34226	0.469768	0.617802	0.450612	0.591667	0.386934	0.429011	0.373839	0.497284	0.485746	0.470725	NaN	NaN	NaN
69.7141	-44.2835	0.518631	0.535712	0.463687	0.338822	0.323348	0.474365	0.609737	0.450039	0.584382	0.391827	0.41692	0.377866	0.499656	0.487564	0.478641	NaN	NaN	NaN
69.7162	-44.2669	0.505432	0.535222	0.469271	0.327	0.330366	0.463229	0.579706	0.4578	0.576855	0.375257	0.432691	0.368856	0.494008	0.493282	0.485205	NaN	NaN	NaN
69.7178	-44.2545	0.502142	0.526331	0.468546	0.326537	0.341276	0.452435	0.557401	0.457204	0.5762	0.343026	0.453107	0.362144	0.488478	0.501059	0.482495	NaN	NaN	NaN
69.72	-44.2379	0.502143	0.508836	0.467578	0.303298	0.363048	0.43086	0.542125	0.456484	0.582003	0.326789	0.457237	0.361906	0.488248	0.512834	0.478495	NaN	NaN	NaN
69.7222	-44.2214	0.502144	0.500111	0.454055	0.291447	0.381142	0.425473	0.505467	0.47308	0.588059	0.342489	0.445494	0.361706	0.488054	0.522641	0.478494	NaN	NaN	NaN
69.7238	-44.209	0.502145	0.491391	0.453583	0.268644	0.384265	0.425024	0.497728	0.481216	0.607432	0.342488	0.440799	0.361625	0.490642	0.524601	0.478494	NaN	NaN	NaN
69.7259	-44.1924	0.502146	0.478342	0.44637	0.279367	0.387542	0.424722	0.482861	0.497997	0.620333	0.342488	0.440798	0.363832	0.493347	0.524656	0.477189	NaN	NaN	NaN
69.728	-44.1759	0.502147	0.478343	0.446371	0.279368	0.387542	0.413963	0.482572	0.515016	0.620331	0.342487	0.445491	0.36833	0.496171	0.524793	0.478594	NaN	NaN	NaN
69.7296	-44.1635	0.502148	0.478343	0.446372	0.313107	0.37673	0.397845	0.503928	0.515015	0.62033	0.342486	0.454883	0.366281	0.504294	0.522965	0.481331	NaN	NaN	NaN
69.7319	-44.1471	0.502149	0.478343	0.452862	0.347074	0.362285	0.397845	0.511198	0.523806	0.614022	0.337254	0.468978	0.368731	0.512578	0.517261	0.488098	NaN	NaN	NaN
69.734	-44.1306	0.50215	0.478344	0.478866	0.336446	0.35143	0.397844	0.540311	0.533031	0.60813	0.342821	0.474044	0.375645	0.518315	0.511598	0.489558	NaN	NaN	NaN
69.7356	-44.1182	0.508737	0.469887	0.491881	0.348073	0.340564	0.413962	0.540807	0.550808	0.595608	0.358953	0.476833	0.380352	0.518663	0.505847	0.488307	NaN	NaN	NaN
69.7376	-44.1017	0.518644	0.474564	0.486402	0.371219	0.329953	0.425021	0.563359	0.543141	0.589805	0.391211	0.470553	0.385101	0.521718	0.50811	0.480464	NaN	NaN	NaN
69.7391	-44.0893	0.518645	0.478916	0.499705	0.383103	0.326727	0.436247	0.571516	0.543989	0.583983	0.407572	0.468749	0.380942	0.52726	0.510271	0.481904	NaN	NaN	NaN
69.7413	-44.0728	0.518646	0.491976	0.507034	0.395196	0.312278	0.463387	0.58719	0.553835	0.571879	0.413449	0.47874	0.363651	0.538122	0.516445	0.496733	NaN	NaN	NaN
69.7435	-44.0563	0.518647	0.500704	0.514111	0.407137	0.312791	0.480257	0.610435	0.537753	0.566244	0.403302	0.493267	0.359605	0.533105	0.53257	0.503607	NaN	NaN	NaN
69.7451	-44.044	0.521952	0.505188	0.514642	0.418934	0.313171	0.486176	0.625855	0.538559	0.553679	0.403598	0.498278	0.373146	0.512101	0.548631	0.498417	NaN	NaN	NaN
69.7472	-44.0275	0.535204	0.50129	0.515434	0.419497	0.32114	0.481575	0.65606	0.522089	0.554387	0.39869	0.505729	0.382329	0.491061	0.568691	0.4879	NaN	NaN	NaN
69.7492	-44.0109	0.535205	0.514406	0.509647	0.431338	0.325325	0.498529	0.657354	0.496661	0.554857	0.409685	0.496673	0.386851	0.491191	0.580772	0.48401	NaN	NaN	NaN
69.7508	-43.9985	0.535206	0.523171	0.516747	0.431907	0.329523	0.520975	0.629229	0.488361	0.555202	0.42062	0.485165	0.38685	0.499237	0.586839	0.485416	NaN	NaN	NaN
69.7529	-43.9821	0.535207	0.527553	0.510427	0.454847	0.337403	0.53805	0.585996	0.479697	0.561866	0.426055	0.480557	0.391299	0.501987	0.590909	0.490821	NaN	NaN	NaN
69.7551	-43.9656	0.535208	0.545124	0.485091	0.454847	0.352656	0.516896	0.563802	0.505673	0.561865	0.415333	0.485162	0.397974	0.494036	0.596901	0.494866	NaN	NaN	NaN
69.7567	-43.9533	0.535209	0.545125	0.485092	0.420449	0.367501	0.511599	0.54902	0.49665	0.568171	0.409831	0.489697	0.400162	0.494035	0.5969	0.498876	NaN	NaN	NaN
69.7588	-43.9368	0.53521	0.545125	0.485093	0.386106	0.378509	0.511598	0.549019	0.479117	0.561272	0.420314	0.482524	0.408909	0.494034	0.5969	0.500212	NaN	NaN	NaN
69.7608	-43.9203	0.528578	0.55368	0.485094	0.340385	0.393162	0.48976	0.577959	0.479116	0.541301	0.414737	0.491723	0.408909	0.494033	0.596899	0.500212	NaN	NaN	NaN
69.7624	-43.908	0.518657	0.566513	0.485095	0.340385	0.38553	0.483989	0.59964	0.452821	0.547611	0.425284	0.486987	0.413281	0.494032	0.596898	0.500211	NaN	NaN	NaN
69.7645	-43.8915	0.518658	0.562104	0.491438	0.340385	0.374096	0.483509	0.591749	0.469894	0.560673	0.425283	0.479886	0.419836	0.504764	0.589009	0.497537	NaN	NaN	NaN
69.7662	-43.8792	0.518659	0.548899	0.510433	0.340386	0.374096	0.483509	0.584369	0.47853	0.560671	0.425282	0.479885	0.419835	0.507447	0.587035	0.493526	NaN	NaN	NaN
69.7683	-43.8627	0.50546	0.561598	0.516755	0.340386	0.374096	0.483508	0.584368	0.478529	0.56067	0.425281	0.479883	0.424284	0.510197	0.579119	0.49084	NaN	NaN	NaN
69.7703	-43.8461	0.50217	0.565872	0.497013	0.374173	0.374096	0.483508	0.584367	0.478528	0.560669	0.409228	0.489146	0.428775	0.507612	0.565182	0.490781	NaN	NaN	NaN
69.7719	-43.8337	0.502171	0.552665	0.502833	0.396657	0.374096	0.483507	0.584366	0.478527	0.560668	0.398533	0.500839	0.422218	0.504927	0.559164	0.489397	NaN	NaN	NaN
69.774	-43.8172	0.502172	0.543881	0.515447	0.351006	0.388727	0.483507	0.584366	0.478526	0.560667	0.403879	0.50801	0.411245	0.494158	0.555048	0.489313	NaN	NaN	NaN
69.7761	-43.8007	0.502173	0.543881	0.515448	0.339612	0.392378	0.483506	0.576983	0.487166	0.560665	0.425278	0.503554	0.393514	0.49396	0.554902	0.487904	NaN	NaN	NaN
69.7777	-43.7883	0.502174	0.543882	0.515449	0.339612	0.384759	0.494077	0.554854	0.513064	0.560664	0.425277	0.501184	0.377903	0.496375	0.560718	0.489191	NaN	NaN	NaN
69.7798	-43.7718	0.512059	0.531096	0.51545	0.339613	0.373346	0.509911	0.525374	0.573831	0.541066	0.441331	0.480078	0.368795	0.496034	0.572439	0.494486	NaN	NaN	NaN
69.7819	-43.7552	0.521971	0.518316	0.522017	0.339768	0.369695	0.50991	0.510648	0.608588	0.527986	0.435977	0.46581	0.370766	0.482433	0.582126	0.498419	NaN	NaN	NaN
69.7834	-43.7427	0.531905	0.50555	0.541746	0.340233	0.358723	0.50991	0.510647	0.591059	0.541063	0.414571	0.458454	0.379391	0.474297	0.581963	0.498342	NaN	NaN	NaN
69.7855	-43.7261	0.545184	0.488549	0.554913	0.329123	0.355061	0.499018	0.480933	0.5552	0.586402	0.371591	0.457735	0.390069	0.463389	0.579695	0.491523	NaN	NaN	NaN
69.7871	-43.7136	0.555172	0.475809	0.574686	0.295281	0.355061	0.460954	0.457958	0.545093	0.631447	0.34998	0.457202	0.385313	0.468405	0.577479	0.483395	NaN	NaN	NaN
69.7892	-43.697	0.568525	0.458839	0.561501	0.295008	0.354776	0.384785	0.477753	0.508487	0.695299	0.333546	0.45888	0.373882	0.483953	0.565299	0.477873	NaN	NaN	NaN
69.7913	-43.6803	0.568526	0.441475	0.5275	0.293814	0.368649	0.330246	0.519258	0.455349	0.739206	0.322403	0.458188	0.380128	0.473009	0.562999	0.475044	NaN	NaN	NaN
69.7929	-43.6678	0.568527	0.437145	0.448715	0.348629	0.378791	0.313566	0.53979	0.428835	0.737825	0.332524	0.457766	0.384307	0.462184	0.566751	0.472295	NaN	NaN	NaN
69.795	-43.6511	0.565185	0.432712	0.370314	0.413856	0.385079	0.323617	0.524592	0.428129	0.703816	0.347694	0.454849	0.388354	0.461934	0.566547	0.470866	NaN	NaN	NaN
69.7971	-43.6344	0.54519	0.44508	0.38267	0.391115	0.373279	0.338979	0.516839	0.453498	0.657546	0.347136	0.454274	0.39243	0.461717	0.570349	0.469477	NaN	NaN	NaN
69.7983	-43.6229	0.528598	0.457542	0.395215	0.391115	0.369512	0.360275	0.481052	0.470468	0.62466	0.362647	0.447093	0.392212	0.472202	0.566339	0.470769	NaN	NaN	NaN
69.7997	-43.6083	0.508772	0.469898	0.394574	0.424333	0.369512	0.371	0.466842	0.470468	0.618086	0.36786	0.44006	0.387664	0.485347	0.564348	0.472088	NaN	NaN	NaN
69.8018	-43.5919	0.489039	0.495295	0.381654	0.480251	0.358673	0.381725	0.47439	0.479484	0.598945	0.362645	0.442402	0.381085	0.493268	0.568356	0.468128	NaN	NaN	NaN
69.8033	-43.5797	0.475934	0.512255	0.394576	0.50332	0.347959	0.392605	0.482092	0.471376	0.612531	0.352426	0.442614	0.37459	0.501269	0.570434	0.465514	NaN	NaN	NaN
69.8054	-43.5633	0.469402	0.520739	0.426946	0.504527	0.344912	0.37703	0.518607	0.454862	0.639469	0.337092	0.447657	0.36384	0.506684	0.576522	0.46294	NaN	NaN	NaN
69.8074	-43.547	0.469403	0.520739	0.465894	0.483258	0.33792	0.388059	0.541102	0.438415	0.660023	0.332316	0.455196	0.35319	0.509552	0.584662	0.4564	NaN	NaN	NaN
69.8089	-43.5347	0.469404	0.520739	0.498435	0.461655	0.338341	0.377694	0.570458	0.430333	0.667244	0.33795	0.46032	0.344653	0.512379	0.588792	0.452486	NaN	NaN	NaN
69.8113	-43.5172	0.475938	0.512257	0.511478	0.450711	0.342261	0.388737	0.593081	0.422454	0.668153	0.348978	0.460879	0.340524	0.517958	0.587033	0.448569	NaN	NaN	NaN
69.8138	-43.502	0.485767	0.512614	0.492709	0.450711	0.353627	0.372964	0.615037	0.422781	0.675228	0.359892	0.461292	0.338526	0.520826	0.579234	0.449928	NaN	NaN	NaN
69.8158	-43.4859	0.492328	0.512865	0.480169	0.450712	0.353627	0.394531	0.615767	0.440601	0.669506	0.376224	0.461835	0.334381	0.526407	0.563515	0.452597	NaN	NaN	NaN
69.8178	-43.4698	0.502195	0.500126	0.50628	0.406034	0.368794	0.378879	0.623276	0.484344	0.657263	0.387248	0.467028	0.319183	0.539855	0.54975	0.452596	NaN	NaN	NaN
69.8192	-43.4577	0.502196	0.500127	0.519357	0.406403	0.365301	0.384404	0.630984	0.502146	0.644699	0.392803	0.472019	0.306086	0.545203	0.541829	0.45524	NaN	NaN	NaN
69.8212	-43.4416	0.508783	0.509096	0.52044	0.407151	0.362088	0.384804	0.616851	0.537166	0.638749	0.398437	0.479449	0.288604	0.545202	0.535849	0.457871	NaN	NaN	NaN
69.8232	-43.4254	0.518689	0.500716	0.533819	0.419144	0.355061	0.374247	0.61685	0.563361	0.62586	0.398509	0.474785	0.29079	0.537178	0.537764	0.452507	NaN	NaN	NaN
69.8247	-43.4133	0.51869	0.500717	0.546955	0.396665	0.355061	0.374246	0.616849	0.56336	0.619208	0.403783	0.4606	0.299469	0.526402	0.543584	0.4498	NaN	NaN	NaN
69.8267	-43.397	0.518691	0.500717	0.546956	0.396665	0.339855	0.395348	0.616848	0.545892	0.599012	0.430133	0.441697	0.31029	0.507575	0.555266	0.445747	NaN	NaN	NaN
69.8287	-43.3808	0.518692	0.500717	0.546957	0.351014	0.339307	0.416416	0.616847	0.510989	0.585216	0.45637	0.420388	0.32324	0.496736	0.563008	0.44036	NaN	NaN	NaN
69.8302	-43.3685	0.518693	0.500717	0.546958	0.316828	0.342686	0.421527	0.601992	0.510603	0.571572	0.466628	0.415489	0.325281	0.493912	0.566848	0.437654	NaN	NaN	NaN
69.8323	-43.3522	0.518694	0.500718	0.546959	0.271324	0.345908	0.415698	0.608609	0.492794	0.564316	0.476776	0.415246	0.318509	0.496312	0.570655	0.434935	NaN	NaN	NaN
69.8338	-43.3399	0.518695	0.500718	0.527265	0.270957	0.349265	0.426196	0.579305	0.492288	0.570425	0.47117	0.424427	0.305247	0.50675	0.568605	0.434897	NaN	NaN	NaN
69.8358	-43.3235	0.518696	0.500718	0.514158	0.270697	0.35654	0.40462	0.556689	0.508755	0.57639	0.465479	0.433535	0.291961	0.514468	0.568487	0.434846	NaN	NaN	NaN
69.8378	-43.3071	0.515392	0.504969	0.494508	0.25901	0.371065	0.388455	0.534292	0.542662	0.58934	0.438839	0.433212	0.289595	0.522219	0.568398	0.433473	NaN	NaN	NaN
69.8393	-43.2949	0.505499	0.517722	0.481431	0.28139	0.363501	0.382809	0.526513	0.550756	0.608759	0.422867	0.428307	0.293848	0.522092	0.570297	0.434781	NaN	NaN	NaN
69.8413	-43.2786	0.502209	0.521973	0.468357	0.303765	0.352171	0.393152	0.511791	0.558983	0.621691	0.401579	0.418642	0.304613	0.524629	0.568248	0.433408	NaN	NaN	NaN
69.8434	-43.2623	0.50221	0.513224	0.461357	0.337265	0.337078	0.392599	0.554831	0.54194	0.62169	0.385622	0.427852	0.30244	0.516632	0.574125	0.432074	NaN	NaN	NaN
69.8449	-43.2501	0.502211	0.500131	0.480184	0.337265	0.33331	0.397827	0.576697	0.516346	0.621689	0.369676	0.451167	0.287228	0.516631	0.574124	0.432074	NaN	NaN	NaN
69.8468	-43.2339	0.502212	0.500131	0.480185	0.337266	0.33331	0.397827	0.605872	0.482195	0.621687	0.369676	0.465287	0.274175	0.51663	0.574123	0.426741	NaN	NaN	NaN
69.8488	-43.2176	0.502213	0.500132	0.480186	0.359908	0.337362	0.382132	0.613172	0.473647	0.621686	0.369675	0.465286	0.280794	0.508758	0.574122	0.425407	NaN	NaN	NaN
69.8502	-43.2054	0.502214	0.500132	0.480187	0.39393	0.341558	0.361173	0.598572	0.490737	0.621685	0.369674	0.460577	0.289559	0.506173	0.572162	0.425407	NaN	NaN	NaN
69.8522	-43.1892	0.502215	0.500132	0.480188	0.393931	0.364253	0.329671	0.576694	0.516343	0.621684	0.369673	0.444108	0.311397	0.508962	0.564322	0.425406	NaN	NaN	NaN
69.8542	-43.1731	0.502216	0.500133	0.493236	0.371607	0.371831	0.31915	0.576694	0.516342	0.621682	0.369672	0.458221	0.30277	0.503708	0.564322	0.425406	NaN	NaN	NaN
69.8558	-43.1609	0.502217	0.500133	0.512841	0.338059	0.360467	0.334926	0.576693	0.516341	0.615072	0.374915	0.462927	0.298418	0.503707	0.564321	0.425405	NaN	NaN	NaN
69.8577	-43.1447	0.502218	0.500133	0.512842	0.338059	0.337781	0.366413	0.576692	0.51634	0.588654	0.411812	0.439603	0.307015	0.511584	0.56432	0.426738	NaN	NaN	NaN
69.8592	-43.1325	0.502219	0.500133	0.512843	0.33806	0.322682	0.387365	0.576691	0.516339	0.588652	0.422447	0.430326	0.306947	0.516832	0.564319	0.430736	NaN	NaN	NaN
69.8611	-43.1163	0.50222	0.500134	0.506304	0.326561	0.333729	0.38213	0.57669	0.516338	0.588651	0.427764	0.428038	0.306946	0.506167	0.564199	0.43735	NaN	NaN	NaN
69.8631	-43.1	0.502221	0.500134	0.480194	0.337269	0.352172	0.371651	0.57669	0.516337	0.58865	0.449047	0.418884	0.306946	0.5035	0.564168	0.444001	NaN	NaN	NaN
69.8646	-43.0878	0.502222	0.500134	0.480195	0.337269	0.359723	0.36117	0.576689	0.516337	0.588649	0.449046	0.418883	0.306945	0.503499	0.564167	0.448	NaN	NaN	NaN
69.8666	-43.0714	0.502223	0.500135	0.480196	0.33727	0.371066	0.356169	0.562458	0.516336	0.588648	0.454367	0.416594	0.311357	0.498249	0.568145	0.44936	NaN	NaN	NaN
69.8686	-43.0551	0.502224	0.500135	0.499774	0.303769	0.382415	0.35655	0.541084	0.516335	0.608456	0.459958	0.40743	0.317978	0.495701	0.570193	0.450732	NaN	NaN	NaN
69.8701	-43.0428	0.502225	0.500135	0.512849	0.281395	0.389992	0.34603	0.541083	0.516334	0.621671	0.449476	0.412134	0.313633	0.503699	0.564313	0.452065	NaN	NaN	NaN
69.872	-43.0264	0.502226	0.500136	0.51285	0.281395	0.389992	0.34603	0.541083	0.516333	0.62167	0.43882	0.435547	0.296237	0.503698	0.564312	0.452065	NaN	NaN	NaN
69.8741	-43.0097	0.502228	0.500136	0.486713	0.326126	0.389992	0.34603	0.541082	0.516332	0.621669	0.422849	0.454189	0.27873	0.511575	0.558343	0.456024	NaN	NaN	NaN
69.8756	-42.9974	0.502229	0.500136	0.454131	0.381879	0.389993	0.346029	0.541081	0.516331	0.621667	0.417524	0.451765	0.27867	0.514156	0.556324	0.457329	NaN	NaN	NaN
69.8776	-42.981	0.50223	0.500136	0.447626	0.39301	0.389993	0.329892	0.562454	0.551025	0.59579	0.390924	0.446717	0.289486	0.506076	0.56612	0.450663	NaN	NaN	NaN
69.879	-42.9686	0.502231	0.500137	0.467159	0.359592	0.382416	0.329667	0.576683	0.53367	0.595515	0.380142	0.441742	0.29591	0.505951	0.571995	0.445329	NaN	NaN	NaN
69.881	-42.9521	0.492366	0.512876	0.506315	0.292588	0.371066	0.33468	0.569044	0.54192	0.588638	0.358681	0.445965	0.300153	0.500498	0.579795	0.437317	NaN	NaN	NaN
69.883	-42.9357	0.485807	0.521369	0.512856	0.281397	0.355947	0.339573	0.575798	0.532957	0.608032	0.316248	0.457148	0.300052	0.497709	0.575694	0.434572	NaN	NaN	NaN
69.8845	-42.9233	0.485808	0.521369	0.493252	0.314947	0.348396	0.350054	0.568515	0.506842	0.620661	0.300234	0.463831	0.29778	0.500247	0.567679	0.434491	NaN	NaN	NaN
69.8865	-42.9068	0.485809	0.521369	0.460647	0.325497	0.347817	0.34955	0.567816	0.506292	0.626677	0.27889	0.479738	0.293372	0.4975	0.561623	0.433078	NaN	NaN	NaN
69.8885	-42.8903	0.48581	0.521369	0.441123	0.347614	0.351437	0.344197	0.574904	0.471726	0.626085	0.283953	0.486546	0.28456	0.502655	0.555599	0.430345	NaN	NaN	NaN
69.89	-42.8779	0.485811	0.52137	0.421624	0.380976	0.340135	0.359881	0.574904	0.471725	0.606324	0.299631	0.479505	0.291069	0.502654	0.553611	0.426334	NaN	NaN	NaN
69.8919	-42.8613	0.485813	0.52137	0.415135	0.39208	0.336373	0.365103	0.574903	0.471724	0.586577	0.331154	0.468003	0.295406	0.502653	0.55361	0.419674	NaN	NaN	NaN
69.8939	-42.8447	0.485814	0.52137	0.441125	0.358907	0.347817	0.344196	0.574902	0.471724	0.586576	0.341733	0.463457	0.295405	0.492006	0.561434	0.418341	NaN	NaN	NaN
69.8954	-42.8323	0.485815	0.521371	0.447636	0.381692	0.34071	0.338966	0.574901	0.497641	0.567244	0.341732	0.468148	0.291067	0.489344	0.563388	0.418341	NaN	NaN	NaN
69.8974	-42.8157	0.485816	0.521371	0.467168	0.359596	0.352173	0.328726	0.560719	0.514937	0.574089	0.326067	0.475188	0.284557	0.484021	0.567298	0.423668	NaN	NaN	NaN
69.8994	-42.7991	0.485817	0.521371	0.480213	0.337276	0.367284	0.323835	0.539415	0.514936	0.587263	0.315613	0.47284	0.277918	0.486516	0.573161	0.428996	NaN	NaN	NaN
69.9009	-42.7867	0.485818	0.521372	0.480214	0.337276	0.371067	0.318582	0.539414	0.514935	0.587262	0.315613	0.463452	0.284394	0.489133	0.57316	0.432992	NaN	NaN	NaN
69.9028	-42.7701	0.485819	0.508265	0.492497	0.314495	0.378164	0.323834	0.539414	0.488995	0.593432	0.315484	0.453926	0.2974	0.489132	0.57316	0.43832	NaN	NaN	NaN
69.9043	-42.7576	0.48582	0.499548	0.485464	0.314051	0.37769	0.328845	0.539079	0.471462	0.599453	0.304721	0.458246	0.303899	0.494451	0.575209	0.434364	NaN	NaN	NaN
69.9063	-42.7411	0.49238	0.491079	0.459448	0.313461	0.373285	0.328257	0.552756	0.471073	0.618755	0.288878	0.462707	0.306063	0.507753	0.569406	0.431726	NaN	NaN	NaN
69.9083	-42.7244	0.502247	0.478374	0.446464	0.290641	0.368892	0.322325	0.595227	0.471072	0.618754	0.288877	0.469734	0.299565	0.521059	0.565586	0.425104	NaN	NaN	NaN
69.9098	-42.7119	0.502248	0.465346	0.46522	0.279402	0.368735	0.316871	0.609358	0.471072	0.618753	0.304719	0.472306	0.2975	0.523852	0.561733	0.415804	NaN	NaN	NaN
69.9117	-42.6952	0.502249	0.456683	0.497179	0.246063	0.368735	0.322206	0.602293	0.488324	0.632214	0.326121	0.468215	0.293297	0.524027	0.553902	0.403813	NaN	NaN	NaN
69.9137	-42.6785	0.50225	0.456683	0.523206	0.235266	0.376737	0.333491	0.574536	0.51465	0.619919	0.347571	0.461757	0.293462	0.510925	0.543962	0.395757	NaN	NaN	NaN
69.9152	-42.666	0.502251	0.456683	0.542763	0.258153	0.377531	0.334088	0.582701	0.498181	0.607307	0.363615	0.455065	0.295731	0.495068	0.537911	0.391686	NaN	NaN	NaN
69.9173	-42.6492	0.489105	0.469238	0.549001	0.348583	0.375008	0.324173	0.590894	0.472987	0.587936	0.390142	0.441314	0.295698	0.476389	0.531714	0.391545	NaN	NaN	NaN
69.9192	-42.6324	0.485828	0.45613	0.573897	0.393946	0.371832	0.303029	0.59071	0.464202	0.600851	0.390141	0.42487	0.293261	0.470748	0.525458	0.392706	NaN	NaN	NaN
69.9207	-42.6197	0.485829	0.45613	0.567376	0.359749	0.378794	0.292095	0.582698	0.463584	0.626507	0.379453	0.410591	0.292958	0.470385	0.527172	0.39526	NaN	NaN	NaN
69.9227	-42.6028	0.48583	0.456131	0.541333	0.313897	0.373756	0.29116	0.573813	0.479558	0.645082	0.368473	0.396082	0.29471	0.472546	0.53675	0.393847	NaN	NaN	NaN
69.9242	-42.5902	0.485832	0.456131	0.521826	0.268412	0.376423	0.290529	0.56548	0.46141	0.676566	0.357594	0.39102	0.303212	0.464412	0.548426	0.391173	NaN	NaN	NaN
69.9262	-42.5732	0.485833	0.456131	0.508845	0.223258	0.371699	0.311081	0.543236	0.46064	0.682153	0.341368	0.409212	0.301015	0.461715	0.552326	0.391172	NaN	NaN	NaN
69.9283	-42.5563	0.485834	0.456132	0.508846	0.245693	0.364509	0.316407	0.536182	0.495016	0.656522	0.31496	0.441618	0.283755	0.46972	0.544522	0.397823	NaN	NaN	NaN
69.9298	-42.5436	0.485835	0.456132	0.528327	0.268553	0.361525	0.316869	0.536868	0.512803	0.618006	0.314959	0.455665	0.277361	0.477812	0.538762	0.400524	NaN	NaN	NaN
69.9317	-42.5264	0.485836	0.456132	0.554352	0.280344	0.366062	0.317558	0.552394	0.513938	0.579698	0.32037	0.455887	0.279656	0.480638	0.538917	0.403254	NaN	NaN	NaN
69.9337	-42.5094	0.485837	0.456133	0.573907	0.280744	0.370296	0.318013	0.567615	0.497491	0.573667	0.31528	0.449002	0.286219	0.475405	0.542885	0.408603	NaN	NaN	NaN
69.9352	-42.4967	0.495682	0.443496	0.573909	0.303336	0.363055	0.301954	0.596149	0.48898	0.573666	0.31528	0.439631	0.288283	0.477936	0.540837	0.415215	NaN	NaN	NaN
69.9372	-42.4797	0.502264	0.435072	0.547847	0.381893	0.33331	0.312102	0.58106	0.479685	0.585993	0.320305	0.430055	0.281452	0.480168	0.536584	0.427032	NaN	NaN	NaN
69.9392	-42.4628	0.502265	0.430756	0.521562	0.380974	0.321338	0.321853	0.558228	0.461277	0.577877	0.3617	0.418081	0.281149	0.474469	0.546141	0.426942	NaN	NaN	NaN
69.9407	-42.45	0.502266	0.417833	0.514241	0.357707	0.324269	0.326587	0.543055	0.434739	0.583155	0.387437	0.408528	0.289677	0.466383	0.557832	0.42029	NaN	NaN	NaN
69.9426	-42.433	0.502267	0.413534	0.488076	0.334391	0.327031	0.336492	0.535138	0.42555	0.614976	0.392626	0.403857	0.29399	0.461079	0.567672	0.407032	NaN	NaN	NaN
69.9441	-42.4203	0.502268	0.413534	0.475158	0.334065	0.330485	0.34168	0.542353	0.434243	0.608737	0.397982	0.406327	0.294098	0.466508	0.561897	0.399079	NaN	NaN	NaN
69.9462	-42.4033	0.502269	0.413534	0.481617	0.34545	0.334515	0.331421	0.578659	0.469341	0.584019	0.387922	0.415945	0.289994	0.482686	0.546431	0.392483	NaN	NaN	NaN
69.9482	-42.3862	0.50227	0.413535	0.513967	0.357545	0.331627	0.326709	0.593882	0.504602	0.572288	0.367423	0.423237	0.288039	0.485601	0.534753	0.395157	NaN	NaN	NaN
69.9497	-42.3734	0.502271	0.413535	0.533416	0.346798	0.343177	0.316636	0.608957	0.488047	0.57927	0.346577	0.43494	0.288209	0.480501	0.528895	0.401807	NaN	NaN	NaN
69.9516	-42.3563	0.502272	0.413536	0.559387	0.302349	0.365752	0.295969	0.609341	0.471054	0.585843	0.341361	0.439623	0.294872	0.475395	0.523035	0.41245	NaN	NaN	NaN
69.9536	-42.3392	0.502273	0.413536	0.572398	0.280081	0.369521	0.290737	0.587572	0.479284	0.578993	0.33587	0.448702	0.290474	0.475311	0.534876	0.420489	NaN	NaN	NaN
69.9551	-42.3263	0.502274	0.413536	0.572399	0.246289	0.372816	0.301198	0.573075	0.453173	0.584856	0.351425	0.443944	0.285976	0.475101	0.550587	0.425855	NaN	NaN	NaN
69.9572	-42.3091	0.502275	0.413537	0.546401	0.268306	0.364977	0.300756	0.586827	0.418518	0.603673	0.367035	0.429903	0.285771	0.474846	0.572211	0.428588	NaN	NaN	NaN
69.9592	-42.2919	0.502276	0.413537	0.520452	0.312719	0.346198	0.316171	0.564742	0.4437	0.616487	0.382873	0.420755	0.28354	0.485376	0.57823	0.42999	NaN	NaN	NaN
69.9607	-42.2789	0.502277	0.413537	0.488088	0.345624	0.342155	0.331787	0.543055	0.486267	0.603671	0.404005	0.418687	0.283641	0.498785	0.572544	0.427398	NaN	NaN	NaN
69.9627	-42.2615	0.502278	0.413538	0.47517	0.334069	0.349201	0.352966	0.507431	0.563402	0.584994	0.414923	0.428461	0.288375	0.507286	0.549202	0.424776	NaN	NaN	NaN
69.9647	-42.2441	0.502279	0.426449	0.495356	0.312561	0.346055	0.37471	0.551946	0.52238	0.625584	0.368391	0.442876	0.282139	0.507634	0.531571	0.422099	NaN	NaN	NaN
69.9662	-42.2311	0.50228	0.435077	0.528351	0.313604	0.347084	0.370318	0.611249	0.429116	0.645801	0.347622	0.450056	0.275694	0.499737	0.525583	0.422043	NaN	NaN	NaN
69.9682	-42.2136	0.502281	0.435078	0.567408	0.325815	0.363202	0.339567	0.575762	0.46368	0.620027	0.342321	0.44529	0.268997	0.488843	0.529255	0.419268	NaN	NaN	NaN
69.9697	-42.2005	0.502282	0.435078	0.567409	0.337131	0.370915	0.313099	0.560855	0.480465	0.59997	0.347273	0.435627	0.26655	0.475175	0.540727	0.416493	NaN	NaN	NaN
69.9717	-42.183	0.492418	0.447716	0.528355	0.313605	0.347073	0.316866	0.565848	0.539238	0.54009	0.362139	0.418473	0.281344	0.453482	0.552004	0.409655	NaN	NaN	NaN
69.9737	-42.1655	0.48586	0.451813	0.489146	0.278875	0.334376	0.283496	0.64898	0.512338	0.499525	0.387257	0.401372	0.309222	0.426764	0.551495	0.402789	NaN	NaN	NaN
69.9752	-42.1523	0.485861	0.438856	0.468969	0.28926	0.359824	0.225477	0.675897	0.485847	0.524676	0.376393	0.396301	0.31768	0.413364	0.545241	0.398625	NaN	NaN	NaN
69.9773	-42.1347	0.485862	0.425926	0.442439	0.3553	0.36341	0.214914	0.653814	0.450863	0.569189	0.376236	0.391505	0.306565	0.423599	0.527257	0.390446	NaN	NaN	NaN
69.9793	-42.1171	0.485863	0.413028	0.441713	0.388306	0.337231	0.251262	0.639407	0.424923	0.574993	0.423274	0.380182	0.293425	0.431296	0.507373	0.383612	NaN	NaN	NaN
69.9808	-42.1039	0.482585	0.417224	0.441714	0.388307	0.318575	0.287721	0.611019	0.416124	0.574557	0.465143	0.361852	0.286749	0.436336	0.499331	0.379508	NaN	NaN	NaN
69.9828	-42.0863	0.469506	0.434009	0.467446	0.344283	0.311125	0.313924	0.568428	0.415756	0.567596	0.512191	0.338849	0.288752	0.422945	0.502984	0.372767	NaN	NaN	NaN
69.9848	-42.0687	0.469507	0.43401	0.49323	0.288972	0.314714	0.313924	0.568427	0.381604	0.580035	0.511966	0.33175	0.299494	0.399159	0.516505	0.370083	NaN	NaN	NaN
69.9863	-42.0555	0.469508	0.43401	0.506147	0.233339	0.325464	0.313923	0.568426	0.381603	0.580034	0.485608	0.338445	0.305974	0.393914	0.522396	0.36746	NaN	NaN	NaN
69.9883	-42.0379	0.469509	0.43401	0.525534	0.189002	0.336491	0.303584	0.568426	0.381603	0.593059	0.42789	0.361168	0.323514	0.391614	0.5207	0.36491	NaN	NaN	NaN
69.9898	-42.0247	0.46951	0.434011	0.538482	0.166842	0.347682	0.288049	0.590012	0.35633	0.612616	0.370319	0.386239	0.325828	0.394409	0.524826	0.363684	NaN	NaN	NaN
69.9918	-42.0074	0.469511	0.434011	0.51907	0.20007	0.355146	0.29886	0.576386	0.33946	0.612614	0.317835	0.422762	0.323886	0.39195	0.536831	0.359844	NaN	NaN	NaN
69.9939	-41.9901	0.469512	0.4211	0.52469	0.233341	0.362781	0.293892	0.583971	0.348301	0.587149	0.275923	0.452405	0.315322	0.415808	0.529261	0.359927	NaN	NaN	NaN
69.9953	-41.9773	0.469513	0.412514	0.537023	0.26687	0.352034	0.309803	0.577332	0.357047	0.568028	0.260224	0.4638	0.311018	0.410512	0.539086	0.357313	NaN	NaN	NaN
69.9973	-41.9602	0.469514	0.412515	0.537024	0.300445	0.341271	0.315112	0.5703	0.408392	0.549304	0.229004	0.477521	0.304559	0.407865	0.541029	0.357312	NaN	NaN	NaN
69.9992	-41.9431	0.469515	0.412515	0.537026	0.334079	0.330489	0.315112	0.5703	0.425529	0.54958	0.218643	0.468207	0.313169	0.407864	0.53707	0.35994	NaN	NaN	NaN
70.0006	-41.9304	0.469516	0.412515	0.537027	0.334079	0.330489	0.309803	0.57733	0.425529	0.549579	0.234336	0.459142	0.310937	0.405139	0.536965	0.36388	NaN	NaN	NaN
70.0025	-41.9135	0.469517	0.412516	0.537028	0.322861	0.319138	0.309341	0.590983	0.425284	0.562359	0.234336	0.452158	0.30644	0.410236	0.536859	0.367821	NaN	NaN	NaN
70.0045	-41.8967	0.469519	0.412516	0.53703	0.278065	0.322306	0.324878	0.569363	0.382142	0.593821	0.255104	0.442932	0.301944	0.410039	0.542615	0.371774	NaN	NaN	NaN
70.0059	-41.8841	0.46952	0.412517	0.530571	0.266744	0.318302	0.324501	0.590406	0.322388	0.625331	0.281156	0.429207	0.301828	0.409918	0.548439	0.377084	NaN	NaN	NaN
70.0078	-41.8672	0.469521	0.412517	0.504781	0.277381	0.321595	0.32426	0.582807	0.322112	0.644394	0.286393	0.424631	0.308351	0.402065	0.554334	0.390392	NaN	NaN	NaN
70.0097	-41.8504	0.469522	0.412518	0.504782	0.277381	0.310439	0.339741	0.568419	0.373061	0.618967	0.286392	0.42463	0.321482	0.394362	0.562355	0.402451	NaN	NaN	NaN
70.0111	-41.8377	0.469523	0.399653	0.510384	0.265957	0.321172	0.339741	0.568418	0.398663	0.612917	0.291758	0.420202	0.328092	0.399803	0.564552	0.409199	NaN	NaN	NaN
70.013	-41.8209	0.469524	0.391099	0.503393	0.321273	0.31402	0.339741	0.568418	0.441383	0.613696	0.276347	0.427329	0.323917	0.42374	0.568944	0.416057	NaN	NaN	NaN
70.0144	-41.8083	0.476058	0.382753	0.503395	0.332439	0.31044	0.350319	0.5616	0.467182	0.620851	0.260906	0.432135	0.321888	0.439753	0.581151	0.410958	NaN	NaN	NaN
70.0163	-41.7916	0.485885	0.383038	0.491368	0.332605	0.318018	0.356024	0.569547	0.459291	0.63456	0.245496	0.446341	0.322247	0.450725	0.589543	0.400555	NaN	NaN	NaN
70.0182	-41.7748	0.485886	0.400159	0.492456	0.333265	0.322307	0.356698	0.577696	0.451494	0.648458	0.2301	0.46298	0.329269	0.44333	0.589929	0.386064	NaN	NaN	NaN
70.0196	-41.7623	0.485887	0.421631	0.480885	0.333758	0.326468	0.351918	0.614405	0.426741	0.64269	0.230292	0.474975	0.33402	0.42782	0.582163	0.376761	NaN	NaN	NaN
70.0215	-41.7456	0.485888	0.443181	0.49513	0.312428	0.330921	0.347379	0.651654	0.402091	0.604365	0.251379	0.484728	0.338775	0.391027	0.568173	0.365991	NaN	NaN	NaN
70.0234	-41.7289	0.48589	0.456151	0.52189	0.290949	0.335385	0.342811	0.652689	0.385406	0.578529	0.267117	0.482547	0.33441	0.361788	0.559837	0.355149	NaN	NaN	NaN
70.0248	-41.7164	0.485891	0.456151	0.541402	0.280094	0.331915	0.342936	0.631088	0.402424	0.55228	0.277414	0.47537	0.332015	0.340379	0.561335	0.34701	NaN	NaN	NaN
70.0266	-41.6997	0.485892	0.443182	0.547038	0.279827	0.316635	0.358166	0.572489	0.478603	0.506154	0.287387	0.458461	0.344653	0.313647	0.556736	0.337454	NaN	NaN	NaN
70.0285	-41.6831	0.476066	0.429923	0.532322	0.267545	0.304212	0.367181	0.520158	0.510588	0.524136	0.292011	0.439113	0.359299	0.294841	0.550186	0.330556	NaN	NaN	NaN
70.0299	-41.6705	0.463006	0.420899	0.50479	0.288561	0.295711	0.355193	0.496584	0.499801	0.58716	0.296863	0.424767	0.361	0.291923	0.543848	0.33302	NaN	NaN	NaN
70.0318	-41.6538	0.443494	0.411688	0.47051	0.308893	0.294257	0.311598	0.51476	0.429459	0.693888	0.301631	0.415022	0.35178	0.307362	0.5396	0.335532	NaN	NaN	NaN
70.0332	-41.6413	0.427306	0.411163	0.450062	0.318704	0.293308	0.305506	0.499081	0.402761	0.756405	0.311887	0.414946	0.349545	0.320499	0.537736	0.334234	NaN	NaN	NaN
70.0351	-41.6245	0.420784	0.410951	0.43683	0.329086	0.289225	0.310238	0.49145	0.419141	0.781986	0.327729	0.429266	0.354417	0.323544	0.536274	0.335739	NaN	NaN	NaN
70.0369	-41.6078	0.420785	0.428091	0.418718	0.318206	0.296584	0.3262	0.492323	0.462128	0.764517	0.328242	0.455416	0.357407	0.340002	0.53122	0.334706	NaN	NaN	NaN
70.0384	-41.5952	0.430542	0.432717	0.419665	0.307791	0.304375	0.332102	0.507615	0.480272	0.746933	0.318243	0.479147	0.34925	0.372164	0.520103	0.336251	NaN	NaN	NaN
70.0402	-41.5784	0.446745	0.437568	0.440284	0.275865	0.316316	0.343824	0.538202	0.465388	0.729797	0.282133	0.516798	0.341204	0.417829	0.497299	0.336501	NaN	NaN	NaN
70.042	-41.5616	0.459755	0.433699	0.473153	0.276976	0.328602	0.350596	0.554755	0.467308	0.699565	0.235347	0.549576	0.359395	0.439908	0.478288	0.326104	NaN	NaN	NaN
70.0433	-41.5491	0.469543	0.434023	0.493272	0.266624	0.344257	0.341161	0.57047	0.468517	0.668283	0.21452	0.570669	0.379642	0.437869	0.468798	0.315601	NaN	NaN	NaN
70.0453	-41.5322	0.469544	0.434024	0.525576	0.26728	0.359985	0.331658	0.578997	0.460976	0.643137	0.19889	0.587086	0.384353	0.440841	0.441222	0.311567	NaN	NaN	NaN
70.0472	-41.5155	0.469545	0.434024	0.538525	0.278755	0.367957	0.337597	0.536655	0.47818	0.597483	0.224938	0.584738	0.359984	0.467107	0.409391	0.316684	NaN	NaN	NaN
70.0486	-41.5029	0.469546	0.434024	0.538527	0.278755	0.360451	0.353352	0.493426	0.503293	0.551319	0.271747	0.568321	0.350875	0.472033	0.403235	0.313887	NaN	NaN	NaN
70.0504	-41.486	0.469547	0.434025	0.519113	0.300763	0.337825	0.389745	0.421272	0.527587	0.478525	0.380822	0.528757	0.352537	0.455555	0.410735	0.307072	NaN	NaN	NaN
70.0522	-41.4691	0.469549	0.416819	0.498642	0.322096	0.325899	0.431197	0.349326	0.500388	0.431467	0.473494	0.495825	0.340881	0.457421	0.414216	0.306858	NaN	NaN	NaN
70.0536	-41.4563	0.46955	0.412528	0.479066	0.332616	0.314302	0.451532	0.313236	0.473755	0.410927	0.514021	0.481396	0.32945	0.464754	0.411909	0.313317	NaN	NaN	NaN
70.0555	-41.4394	0.469551	0.412529	0.446956	0.331788	0.302467	0.471448	0.312821	0.396625	0.415949	0.507366	0.484982	0.331209	0.456378	0.413556	0.325097	NaN	NaN	NaN
70.057	-41.4266	0.469552	0.399665	0.439814	0.342243	0.298363	0.476038	0.312512	0.353852	0.427909	0.485769	0.493443	0.33316	0.458825	0.413451	0.338302	NaN	NaN	NaN
70.0589	-41.4094	0.469553	0.391111	0.439324	0.330786	0.305352	0.454617	0.347722	0.345376	0.408482	0.433206	0.51778	0.337423	0.474702	0.41556	0.355629	NaN	NaN	NaN
70.0607	-41.3922	0.469554	0.391111	0.439326	0.330786	0.309055	0.428265	0.375845	0.387781	0.351109	0.412	0.5426	0.348521	0.490977	0.411957	0.363763	NaN	NaN	NaN
70.0621	-41.3793	0.459768	0.403651	0.439327	0.341893	0.305494	0.407079	0.403925	0.413252	0.332102	0.406806	0.55646	0.359719	0.491407	0.412204	0.361249	NaN	NaN	NaN
70.064	-41.362	0.453263	0.412011	0.445721	0.375461	0.302334	0.375796	0.424953	0.421749	0.351495	0.391601	0.570529	0.36882	0.478567	0.424243	0.350788	NaN	NaN	NaN
70.0659	-41.3448	0.453264	0.412011	0.471342	0.331624	0.309754	0.360213	0.46058	0.388258	0.351495	0.417596	0.57104	0.362434	0.473327	0.434154	0.344213	NaN	NaN	NaN
70.0674	-41.3318	0.453265	0.412011	0.471344	0.365048	0.299036	0.344361	0.488742	0.40537	0.345342	0.428206	0.562118	0.360233	0.475945	0.430188	0.342858	NaN	NaN	NaN
70.0693	-41.3144	0.453266	0.412012	0.477754	0.376406	0.291878	0.339083	0.495733	0.422387	0.351974	0.438934	0.55095	0.360232	0.475944	0.418294	0.344107	NaN	NaN	NaN
70.0712	-41.2969	0.453267	0.412012	0.50344	0.332456	0.291878	0.360212	0.489232	0.422767	0.33292	0.454571	0.544243	0.360231	0.475943	0.406402	0.344027	NaN	NaN	NaN
70.0726	-41.2838	0.453268	0.412013	0.503441	0.332457	0.291878	0.365502	0.496569	0.423019	0.333093	0.454789	0.539766	0.360231	0.475942	0.40442	0.344014	NaN	NaN	NaN
70.0745	-41.2662	0.453269	0.412013	0.503442	0.332457	0.291878	0.365501	0.496569	0.423018	0.352448	0.43945	0.539765	0.36023	0.465303	0.422156	0.334786	NaN	NaN	NaN
70.076	-41.2531	0.45327	0.412014	0.503444	0.332458	0.291878	0.370788	0.489564	0.423018	0.352448	0.439449	0.539764	0.360229	0.462643	0.43204	0.330854	NaN	NaN	NaN
70.0779	-41.2355	0.453271	0.394887	0.528009	0.332458	0.291879	0.391964	0.461506	0.423017	0.352447	0.439448	0.539763	0.360228	0.462642	0.434021	0.330866	NaN	NaN	NaN
70.0798	-41.2179	0.453272	0.390617	0.534138	0.332459	0.291879	0.391964	0.461506	0.38895	0.377867	0.439447	0.530434	0.368856	0.462641	0.432038	0.33218	NaN	NaN	NaN
70.0812	-41.2046	0.453273	0.390617	0.521289	0.354452	0.291879	0.391964	0.461505	0.380442	0.384213	0.439446	0.521109	0.377478	0.46264	0.426092	0.336124	NaN	NaN	NaN
70.0831	-41.1869	0.453274	0.390618	0.50205	0.387377	0.291879	0.391964	0.461505	0.371931	0.390563	0.423796	0.513846	0.383802	0.470497	0.416183	0.342696	NaN	NaN	NaN
70.0851	-41.1692	0.453276	0.390618	0.502052	0.387378	0.280753	0.396805	0.475541	0.337925	0.390133	0.43382	0.515989	0.381556	0.475732	0.412219	0.340014	NaN	NaN	NaN
70.0865	-41.1559	0.453277	0.390619	0.502053	0.387378	0.273347	0.391209	0.496565	0.337925	0.38369	0.438926	0.515988	0.381555	0.475731	0.406275	0.341302	NaN	NaN	NaN
70.0884	-41.1381	0.453278	0.390619	0.502054	0.387379	0.273347	0.391209	0.496565	0.337924	0.383689	0.438925	0.52763	0.370788	0.47573	0.404293	0.337306	NaN	NaN	NaN
70.0903	-41.1203	0.453279	0.39062	0.502056	0.365056	0.287913	0.380936	0.496564	0.337924	0.36436	0.433404	0.555207	0.353539	0.470412	0.408206	0.33067	NaN	NaN	NaN
70.0918	-41.1069	0.45328	0.386348	0.508188	0.331633	0.309757	0.3655	0.482219	0.354713	0.351486	0.4384	0.562099	0.344823	0.457041	0.413974	0.330617	NaN	NaN	NaN
70.0937	-41.0891	0.453281	0.369302	0.532659	0.320494	0.313329	0.360211	0.467736	0.379866	0.351485	0.433193	0.550347	0.335786	0.448676	0.415622	0.33709	NaN	NaN	NaN
70.0956	-41.0712	0.453282	0.369303	0.526249	0.286992	0.316465	0.354519	0.459941	0.387778	0.376831	0.412383	0.529004	0.333061	0.445461	0.39743	0.359292	NaN	NaN	NaN
70.0971	-41.0578	0.453283	0.369303	0.507045	0.286549	0.312338	0.359235	0.445191	0.387176	0.402036	0.412283	0.503338	0.336946	0.442399	0.381343	0.376225	NaN	NaN	NaN
70.099	-41.0398	0.453284	0.369304	0.468718	0.318887	0.300833	0.363651	0.430175	0.377882	0.42683	0.411883	0.479763	0.345093	0.431395	0.375067	0.385215	NaN	NaN	NaN
70.1005	-41.0261	0.453285	0.369304	0.44324	0.32928	0.293051	0.373441	0.408386	0.368725	0.470934	0.396301	0.467909	0.349106	0.425857	0.376832	0.386418	NaN	NaN	NaN
70.1024	-41.0081	0.453286	0.369305	0.417808	0.361744	0.278203	0.377945	0.40071	0.359726	0.508646	0.385921	0.458469	0.357573	0.417841	0.382617	0.378439	NaN	NaN	NaN
70.1043	-40.9901	0.453288	0.369305	0.405118	0.383457	0.270859	0.388132	0.386523	0.376327	0.508645	0.38592	0.458468	0.370692	0.4075	0.384642	0.371869	NaN	NaN	NaN
70.1058	-40.9767	0.453289	0.369306	0.405119	0.383457	0.27453	0.38304	0.407808	0.368261	0.496083	0.391108	0.467817	0.375312	0.399834	0.384747	0.370611	NaN	NaN	NaN
70.1077	-40.9587	0.45329	0.35655	0.448848	0.339999	0.292915	0.362785	0.450606	0.360639	0.458337	0.422268	0.470661	0.380032	0.386934	0.384851	0.370676	NaN	NaN	NaN
70.1097	-40.9407	0.453291	0.348069	0.486493	0.340699	0.297146	0.358249	0.47262	0.319165	0.445735	0.448264	0.473415	0.371553	0.38171	0.392745	0.369417	NaN	NaN	NaN
70.1111	-40.9272	0.453292	0.348069	0.499247	0.329961	0.304664	0.342886	0.494028	0.294105	0.445734	0.463876	0.46903	0.365024	0.386932	0.392744	0.369416	NaN	NaN	NaN
70.113	-40.9092	0.453293	0.34807	0.505624	0.319052	0.30836	0.337759	0.486888	0.294013	0.452036	0.463875	0.459745	0.353886	0.407769	0.39469	0.369416	NaN	NaN	NaN
70.115	-40.8911	0.453294	0.34807	0.512006	0.319213	0.293728	0.353131	0.436988	0.318663	0.477212	0.463875	0.448145	0.355847	0.407612	0.402475	0.369415	NaN	NaN	NaN
70.1164	-40.8776	0.453295	0.348071	0.499252	0.374328	0.271991	0.368479	0.401413	0.360297	0.477211	0.453463	0.450298	0.362364	0.402398	0.404448	0.368106	NaN	NaN	NaN
70.1183	-40.8595	0.453296	0.348071	0.499253	0.38544	0.253697	0.38891	0.387202	0.385357	0.470921	0.43786	0.468594	0.362598	0.389356	0.412342	0.362871	NaN	NaN	NaN
70.1198	-40.846	0.453297	0.348072	0.499255	0.385441	0.253697	0.38891	0.408523	0.385727	0.464885	0.427671	0.480195	0.362829	0.384244	0.406503	0.366845	NaN	NaN	NaN
70.1217	-40.8279	0.453298	0.348072	0.499257	0.385442	0.261058	0.394483	0.430322	0.377994	0.452666	0.412371	0.496448	0.360956	0.389755	0.398823	0.368233	NaN	NaN	NaN
70.1236	-40.8098	0.453299	0.348073	0.499258	0.385442	0.275802	0.384568	0.452014	0.344727	0.446353	0.41237	0.503417	0.358897	0.403071	0.391107	0.372256	NaN	NaN	NaN
70.1251	-40.7963	0.453301	0.348073	0.49926	0.385443	0.286876	0.369207	0.459154	0.33637	0.446353	0.427973	0.494395	0.358852	0.410983	0.393133	0.373629	NaN	NaN	NaN
70.1269	-40.7783	0.453302	0.348073	0.499261	0.429916	0.276309	0.36408	0.459154	0.336369	0.446352	0.438383	0.475986	0.362964	0.421427	0.401034	0.373692	NaN	NaN	NaN
70.1288	-40.7604	0.453303	0.348074	0.499263	0.441056	0.272736	0.36408	0.459153	0.336369	0.439915	0.459103	0.462311	0.369399	0.421426	0.404985	0.375049	NaN	NaN	NaN
70.1302	-40.747	0.453304	0.348074	0.499264	0.441056	0.261655	0.379451	0.459153	0.336368	0.420622	0.484813	0.457833	0.373782	0.416204	0.410912	0.371118	NaN	NaN	NaN
70.1321	-40.7292	0.453305	0.348075	0.499266	0.441057	0.254279	0.389681	0.459153	0.336368	0.414196	0.489903	0.469444	0.369632	0.411017	0.410938	0.369808	NaN	NaN	NaN
70.134	-40.7114	0.453306	0.348075	0.499267	0.441058	0.25428	0.389681	0.459152	0.327906	0.41408	0.494996	0.488037	0.352446	0.426918	0.399239	0.369807	NaN	NaN	NaN
70.1354	-40.6981	0.453307	0.348076	0.499269	0.441059	0.25428	0.389681	0.459152	0.302545	0.41373	0.510263	0.492688	0.343758	0.437443	0.391384	0.36845	NaN	NaN	NaN
70.1372	-40.6803	0.453308	0.348076	0.49927	0.429921	0.272614	0.369207	0.430612	0.327503	0.413612	0.494515	0.487682	0.343501	0.421303	0.402927	0.369681	NaN	NaN	NaN
70.1386	-40.667	0.453309	0.348077	0.492893	0.40747	0.287012	0.364079	0.40923	0.352525	0.413612	0.478902	0.480449	0.343238	0.415773	0.404685	0.372219	NaN	NaN	NaN
70.1405	-40.6493	0.45331	0.348077	0.467427	0.43994	0.275805	0.384567	0.380756	0.360512	0.43251	0.4581	0.468495	0.34503	0.423394	0.388757	0.381279	NaN	NaN	NaN
70.1424	-40.6316	0.453311	0.348077	0.467428	0.439941	0.253696	0.399433	0.373259	0.376919	0.445092	0.437317	0.461194	0.349087	0.420545	0.384652	0.385115	NaN	NaN	NaN
70.1438	-40.6184	0.453312	0.348078	0.46743	0.406632	0.249677	0.409308	0.387198	0.376918	0.445091	0.426928	0.461022	0.346808	0.420423	0.388516	0.385097	NaN	NaN	NaN
70.1456	-40.6008	0.453314	0.348078	0.467431	0.384467	0.253116	0.414399	0.387197	0.376918	0.419431	0.4317	0.467707	0.346807	0.420422	0.39246	0.377185	NaN	NaN	NaN
70.1474	-40.5832	0.453315	0.348079	0.467433	0.384468	0.260461	0.393697	0.422454	0.318249	0.438175	0.436778	0.474654	0.340384	0.420421	0.398377	0.370614	NaN	NaN	NaN
70.1488	-40.57	0.446814	0.356382	0.467434	0.373384	0.275051	0.362639	0.457558	0.293173	0.444455	0.421216	0.485969	0.336098	0.42042	0.398376	0.365317	NaN	NaN	NaN
70.1506	-40.5525	0.43709	0.368837	0.467436	0.329129	0.296603	0.352429	0.457557	0.293173	0.425231	0.426089	0.48115	0.344666	0.417775	0.384541	0.366508	NaN	NaN	NaN
70.1525	-40.5349	0.437091	0.368838	0.467437	0.329129	0.296603	0.352429	0.457557	0.267915	0.431269	0.436235	0.460319	0.352989	0.420215	0.368663	0.372922	NaN	NaN	NaN
70.1538	-40.5218	0.437092	0.368838	0.461076	0.340017	0.285564	0.367744	0.436216	0.276075	0.443813	0.436234	0.448754	0.352752	0.425291	0.360703	0.374122	NaN	NaN	NaN
70.1556	-40.5043	0.437093	0.368839	0.435675	0.38348	0.263525	0.387819	0.435917	0.292705	0.431012	0.44638	0.44413	0.341744	0.438199	0.360651	0.370118	NaN	NaN	NaN
70.1574	-40.4868	0.437094	0.368839	0.435676	0.38348	0.234223	0.412733	0.428351	0.325943	0.41183	0.461581	0.444129	0.335199	0.445989	0.36262	0.363521	NaN	NaN	NaN
70.1588	-40.4738	0.437095	0.356097	0.453949	0.350335	0.237549	0.422866	0.42126	0.334241	0.411829	0.461581	0.44644	0.335244	0.443392	0.36262	0.362198	NaN	NaN	NaN
70.1606	-40.4565	0.437096	0.347625	0.466103	0.328279	0.277554	0.377195	0.42126	0.334241	0.411829	0.46158	0.455688	0.335424	0.430358	0.362593	0.359535	NaN	NaN	NaN
70.162	-40.4435	0.437097	0.347626	0.466104	0.32828	0.314302	0.32621	0.42126	0.334241	0.411828	0.461579	0.455687	0.335423	0.422434	0.362514	0.359483	NaN	NaN	NaN
70.1638	-40.4262	0.437098	0.347626	0.466106	0.328281	0.325361	0.310862	0.421259	0.33424	0.411827	0.440859	0.462273	0.335377	0.422391	0.356579	0.359414	NaN	NaN	NaN
70.1656	-40.4089	0.427392	0.360066	0.45342	0.34999	0.303265	0.336285	0.428203	0.33424	0.411827	0.435684	0.450627	0.339466	0.42222	0.35057	0.363257	NaN	NaN	NaN
70.1669	-40.3959	0.420874	0.36836	0.434428	0.360436	0.280967	0.361329	0.441916	0.342542	0.411826	0.435683	0.436768	0.345725	0.427371	0.342671	0.365811	NaN	NaN	NaN
70.1687	-40.3787	0.420875	0.36836	0.4281	0.338253	0.262288	0.396698	0.420507	0.375705	0.411826	0.435682	0.418306	0.354056	0.427196	0.338635	0.368345	NaN	NaN	NaN
70.1704	-40.3614	0.420876	0.368361	0.402833	0.381482	0.25134	0.411882	0.413424	0.383992	0.411825	0.435681	0.402168	0.362418	0.427064	0.336592	0.36695	NaN	NaN	NaN
70.1718	-40.3484	0.420877	0.368361	0.402835	0.381483	0.25134	0.411882	0.3922	0.383612	0.417852	0.445813	0.39756	0.366669	0.419151	0.342415	0.362986	NaN	NaN	NaN
70.1736	-40.3311	0.420878	0.368362	0.390215	0.370096	0.261919	0.411882	0.385132	0.375093	0.411222	0.460993	0.399862	0.36672	0.416557	0.342415	0.361664	NaN	NaN	NaN
70.1753	-40.3137	0.42088	0.368362	0.371323	0.380472	0.268957	0.411882	0.385132	0.375092	0.411222	0.460992	0.411386	0.364797	0.395626	0.35411	0.3617	NaN	NaN	NaN
70.1766	-40.3007	0.420881	0.368363	0.371324	0.380473	0.272604	0.406824	0.385132	0.375092	0.411221	0.450641	0.422752	0.362768	0.387797	0.361949	0.361753	NaN	NaN	NaN
70.1784	-40.2834	0.420882	0.368363	0.371326	0.380474	0.287215	0.386558	0.385132	0.375091	0.411221	0.435127	0.438644	0.360788	0.380003	0.369817	0.360503	NaN	NaN	NaN
70.1798	-40.2703	0.420883	0.368364	0.371327	0.380475	0.287216	0.386558	0.385131	0.375091	0.41122	0.435127	0.443258	0.356524	0.380002	0.373751	0.360538	NaN	NaN	NaN
70.1816	-40.2529	0.41077	0.380835	0.371328	0.358537	0.294252	0.386558	0.385131	0.375091	0.411219	0.435126	0.443257	0.356524	0.380002	0.381621	0.355321	NaN	NaN	NaN
70.1833	-40.2355	0.404059	0.389149	0.37133	0.325694	0.319414	0.36626	0.385131	0.37509	0.411219	0.435125	0.438641	0.352065	0.39039	0.38162	0.350033	NaN	NaN	NaN
70.1847	-40.2224	0.404062	0.389149	0.371331	0.325695	0.323078	0.361176	0.385131	0.37509	0.411218	0.435124	0.431721	0.349738	0.400773	0.381619	0.34739	NaN	NaN	NaN
70.1865	-40.205	0.404065	0.38915	0.371332	0.325696	0.323079	0.361176	0.38513	0.375089	0.411218	0.419616	0.429161	0.35172	0.405919	0.375687	0.346	NaN	NaN	NaN
70.1883	-40.1875	0.404067	0.38915	0.371333	0.325697	0.323079	0.361176	0.38513	0.375089	0.411217	0.409287	0.422078	0.353649	0.405749	0.377541	0.341985	NaN	NaN	NaN
70.1896	-40.1743	0.40407	0.38915	0.371335	0.325697	0.323079	0.361176	0.38513	0.375088	0.411216	0.409286	0.419775	0.355774	0.400478	0.37355	0.343237	NaN	NaN	NaN
70.1914	-40.1568	0.404073	0.380637	0.383487	0.325698	0.32308	0.361176	0.38513	0.375088	0.411216	0.409286	0.419774	0.355773	0.392575	0.371498	0.348449	NaN	NaN	NaN
70.1932	-40.1392	0.404076	0.3679	0.401674	0.325699	0.32308	0.361176	0.35687	0.408154	0.411215	0.40412	0.421993	0.355772	0.387306	0.36751	0.353661	NaN	NaN	NaN
70.1945	-40.1261	0.404078	0.367901	0.401675	0.3257	0.323081	0.361176	0.349814	0.416409	0.40483	0.393696	0.428646	0.355772	0.379406	0.371355	0.354963	NaN	NaN	NaN
70.1963	-40.1086	0.404081	0.367901	0.401677	0.3257	0.323081	0.361176	0.349814	0.416408	0.379318	0.40876	0.437768	0.349391	0.379405	0.371354	0.354962	NaN	NaN	NaN
70.1981	-40.091	0.404084	0.367901	0.401678	0.325701	0.323081	0.361176	0.349814	0.408012	0.385582	0.408759	0.442375	0.345133	0.379404	0.371354	0.354961	NaN	NaN	NaN
70.1994	-40.0779	0.404087	0.367902	0.40168	0.325702	0.319418	0.36626	0.349814	0.38285	0.404355	0.408758	0.442374	0.347309	0.376811	0.371353	0.354961	NaN	NaN	NaN
70.2012	-40.0603	0.40409	0.367902	0.401681	0.325703	0.304788	0.386559	0.328648	0.399234	0.391487	0.413596	0.4445	0.358147	0.366432	0.371352	0.35496	NaN	NaN	NaN
70.2025	-40.0471	0.404092	0.367903	0.401682	0.325703	0.304789	0.386559	0.314557	0.41572	0.378754	0.408228	0.444231	0.364528	0.366431	0.371351	0.35496	NaN	NaN	NaN
70.2043	-40.0295	0.404095	0.367903	0.401684	0.325704	0.304789	0.386559	0.314556	0.415719	0.378754	0.408228	0.432723	0.366445	0.368909	0.367336	0.361471	NaN	NaN	NaN
70.2061	-40.0118	0.404098	0.367904	0.401685	0.325705	0.29018	0.406825	0.314556	0.415719	0.378753	0.408227	0.423522	0.361884	0.350263	0.380705	0.363999	NaN	NaN	NaN
70.2074	-39.9986	0.404101	0.367904	0.401687	0.325706	0.286534	0.406653	0.321488	0.415719	0.378753	0.408226	0.418924	0.357431	0.342227	0.388344	0.366582	NaN	NaN	NaN
70.2092	-39.9809	0.404104	0.367905	0.401688	0.325707	0.286535	0.385764	0.349176	0.415718	0.378752	0.403073	0.421137	0.355256	0.347445	0.386411	0.371861	NaN	NaN	NaN
70.211	-39.9632	0.404106	0.367905	0.401689	0.325707	0.286535	0.385764	0.349176	0.415718	0.378752	0.38248	0.439179	0.35111	0.368553	0.376895	0.375918	NaN	NaN	NaN
70.2123	-39.95	0.404109	0.367906	0.401691	0.325708	0.286535	0.375326	0.341881	0.415303	0.397505	0.382479	0.448378	0.349135	0.381828	0.369268	0.374673	NaN	NaN	NaN
70.2141	-39.9323	0.404112	0.367906	0.401692	0.325709	0.286536	0.359693	0.348534	0.415025	0.40999	0.382478	0.45298	0.344881	0.402889	0.363597	0.3642	NaN	NaN	NaN
70.2158	-39.9146	0.404115	0.355191	0.419856	0.32571	0.286536	0.359693	0.348534	0.415024	0.40999	0.382478	0.446076	0.344733	0.402761	0.365479	0.349637	NaN	NaN	NaN
70.2171	-39.9013	0.404118	0.346737	0.431937	0.32571	0.286537	0.354482	0.355439	0.415024	0.409989	0.382477	0.432277	0.344435	0.389347	0.373023	0.340272	NaN	NaN	NaN
70.2189	-39.8835	0.40412	0.346738	0.431938	0.325711	0.271958	0.353895	0.383017	0.415023	0.409989	0.382476	0.409305	0.339592	0.357324	0.387997	0.33471	NaN	NaN	NaN
70.2203	-39.8702	0.404123	0.346738	0.43194	0.325712	0.26832	0.358942	0.383017	0.415023	0.409988	0.377328	0.397749	0.332784	0.343859	0.385585	0.339709	NaN	NaN	NaN
70.222	-39.8525	0.404126	0.346739	0.431941	0.325713	0.257406	0.374081	0.383017	0.381571	0.434944	0.356759	0.395127	0.321704	0.359182	0.36587	0.347344	NaN	NaN	NaN
70.2238	-39.8347	0.404129	0.346739	0.413071	0.358	0.250143	0.384156	0.383017	0.373219	0.441174	0.356758	0.395126	0.310882	0.395654	0.336769	0.355127	NaN	NaN	NaN
70.2251	-39.8213	0.404131	0.34674	0.400517	0.379481	0.24288	0.394229	0.383017	0.373218	0.441173	0.356758	0.395125	0.310881	0.411387	0.329104	0.356484	NaN	NaN	NaN
70.2269	-39.8036	0.404134	0.34674	0.400518	0.379481	0.232005	0.409311	0.361927	0.38954	0.44104	0.361805	0.402	0.30453	0.416633	0.335034	0.351314	NaN	NaN	NaN
70.2287	-39.7858	0.404137	0.346741	0.40052	0.379482	0.232005	0.409311	0.347886	0.372587	0.440506	0.381971	0.406586	0.302456	0.414056	0.34091	0.34742	NaN	NaN	NaN
70.23	-39.7725	0.40414	0.346741	0.400521	0.379483	0.232005	0.409311	0.347886	0.372587	0.440505	0.38197	0.404291	0.311068	0.398455	0.344742	0.346082	NaN	NaN	NaN
70.2318	-39.7548	0.404143	0.346741	0.400523	0.379484	0.232006	0.409311	0.340864	0.380802	0.440504	0.381969	0.39283	0.323817	0.37752	0.350414	0.347321	NaN	NaN	NaN
70.2335	-39.737	0.404145	0.346742	0.400524	0.379485	0.232006	0.409311	0.312815	0.396939	0.452947	0.381969	0.383667	0.332275	0.364416	0.352221	0.35251	NaN	NaN	NaN
70.2348	-39.7237	0.404148	0.346742	0.400525	0.379486	0.232006	0.409311	0.312815	0.37195	0.471586	0.381968	0.383666	0.332275	0.364415	0.350263	0.353806	NaN	NaN	NaN
70.2365	-39.706	0.404151	0.346743	0.400527	0.379487	0.232007	0.409311	0.312815	0.37195	0.471585	0.376827	0.388165	0.325831	0.374812	0.350322	0.353845	NaN	NaN	NaN
70.2383	-39.6883	0.404154	0.346743	0.400528	0.379488	0.232007	0.409312	0.312814	0.371949	0.471585	0.356283	0.406157	0.310876	0.395647	0.352428	0.351329	NaN	NaN	NaN
70.2397	-39.6749	0.404157	0.346744	0.40053	0.379489	0.23563	0.404288	0.326831	0.355549	0.471584	0.356282	0.413031	0.311017	0.398405	0.354504	0.348791	NaN	NaN	NaN
70.2414	-39.6572	0.404159	0.346744	0.400531	0.37949	0.250147	0.384157	0.347885	0.330914	0.471584	0.356281	0.417615	0.319773	0.393427	0.350701	0.347512	NaN	NaN	NaN
70.2427	-39.6438	0.404162	0.346745	0.400533	0.379491	0.250147	0.384158	0.347884	0.322584	0.477795	0.356281	0.417615	0.321939	0.390847	0.350701	0.347511	NaN	NaN	NaN
70.2444	-39.626	0.404165	0.346745	0.400534	0.379492	0.250147	0.384158	0.347884	0.289309	0.502611	0.35628	0.417614	0.315439	0.393336	0.352601	0.343538	NaN	NaN	NaN
70.2462	-39.6082	0.404168	0.346746	0.400535	0.379492	0.250148	0.384158	0.347884	0.289309	0.50261	0.35628	0.413027	0.304521	0.398265	0.352454	0.342124	NaN	NaN	NaN
70.2475	-39.5948	0.404171	0.346746	0.400537	0.379493	0.250148	0.384158	0.347884	0.289309	0.502609	0.356279	0.40157	0.304288	0.398035	0.354262	0.34073	NaN	NaN	NaN
70.2493	-39.5769	0.404173	0.346747	0.394259	0.390236	0.239258	0.399262	0.340862	0.297525	0.502609	0.356278	0.387832	0.304006	0.400374	0.352154	0.340613	NaN	NaN	NaN
70.251	-39.5589	0.404176	0.346747	0.369196	0.433112	0.23201	0.409313	0.312813	0.330345	0.502608	0.356278	0.383255	0.29959	0.397567	0.353959	0.340534	NaN	NaN	NaN
70.2523	-39.5455	0.404179	0.346747	0.369197	0.433113	0.224763	0.419361	0.291796	0.354936	0.502607	0.340879	0.389873	0.301749	0.387143	0.359736	0.340533	NaN	NaN	NaN
70.2541	-39.5275	0.404182	0.346748	0.369198	0.433114	0.213911	0.434407	0.277803	0.371306	0.483548	0.345738	0.39428	0.31039	0.376853	0.359735	0.340532	NaN	NaN	NaN
70.2559	-39.5094	0.404185	0.346748	0.3692	0.433115	0.213912	0.434407	0.277803	0.371305	0.470855	0.355802	0.39428	0.314711	0.371706	0.359734	0.340532	NaN	NaN	NaN
70.2572	-39.4959	0.404187	0.346749	0.369201	0.433116	0.203069	0.449438	0.277803	0.371305	0.470855	0.355802	0.394279	0.321196	0.363981	0.359733	0.340531	NaN	NaN	NaN
70.2589	-39.4778	0.40419	0.346749	0.369202	0.433117	0.195854	0.459441	0.298797	0.346742	0.470854	0.355801	0.394278	0.321195	0.369216	0.355882	0.340531	NaN	NaN	NaN
70.2602	-39.4643	0.404193	0.34675	0.369204	0.433118	0.195854	0.459441	0.312812	0.330343	0.470854	0.3558	0.394277	0.321195	0.377071	0.350102	0.34053	NaN	NaN	NaN
70.262	-39.4462	0.404196	0.34675	0.369205	0.43312	0.195854	0.459441	0.312812	0.330343	0.470853	0.3558	0.394276	0.321194	0.37707	0.350101	0.340529	NaN	NaN	NaN
70.2637	-39.4282	0.404199	0.346751	0.369206	0.433121	0.206682	0.423655	0.340356	0.330343	0.44548	0.360539	0.400885	0.321193	0.377069	0.342274	0.34045	NaN	NaN	NaN
70.2651	-39.4147	0.404201	0.346751	0.369208	0.433122	0.213914	0.408444	0.347231	0.330342	0.439144	0.355321	0.402998	0.318981	0.379599	0.338332	0.34039	NaN	NaN	NaN
70.2668	-39.3966	0.404204	0.346752	0.369209	0.433123	0.228388	0.388373	0.326215	0.354933	0.439143	0.35532	0.393853	0.320942	0.376846	0.336258	0.341605	NaN	NaN	NaN
70.2685	-39.3786	0.404207	0.346752	0.36921	0.433124	0.232013	0.383347	0.312224	0.354677	0.451544	0.35532	0.386997	0.32295	0.371524	0.33614	0.338892	NaN	NaN	NaN
70.2698	-39.3651	0.40421	0.346753	0.369212	0.433125	0.224767	0.393397	0.312223	0.32977	0.470122	0.355319	0.382429	0.320689	0.37139	0.33605	0.337516	NaN	NaN	NaN
70.2716	-39.3471	0.404213	0.346753	0.369213	0.433126	0.206684	0.41847	0.298233	0.346139	0.451115	0.370389	0.382428	0.318529	0.366116	0.33596	0.33614	NaN	NaN	NaN
70.2733	-39.3291	0.404215	0.334087	0.387324	0.433127	0.195856	0.433481	0.277277	0.370656	0.438458	0.375302	0.384629	0.309895	0.365939	0.337793	0.340022	NaN	NaN	NaN
70.2746	-39.3157	0.404218	0.325666	0.39937	0.433128	0.195857	0.433481	0.277277	0.370656	0.438458	0.359949	0.391228	0.309894	0.363325	0.339715	0.340022	NaN	NaN	NaN
70.2763	-39.2977	0.404221	0.325667	0.399371	0.433129	0.206685	0.408095	0.291031	0.370656	0.438457	0.354835	0.393425	0.309894	0.363324	0.339714	0.340021	NaN	NaN	NaN
70.278	-39.2797	0.404224	0.325667	0.399373	0.43313	0.213916	0.382529	0.31163	0.370655	0.438457	0.354835	0.39114	0.312002	0.363323	0.339713	0.34002	NaN	NaN	NaN
70.2793	-39.2663	0.404227	0.325668	0.399374	0.433131	0.213917	0.382529	0.31163	0.370655	0.419476	0.369882	0.384292	0.318324	0.363322	0.339713	0.34002	NaN	NaN	NaN
70.2811	-39.2484	0.404229	0.325668	0.399375	0.422187	0.217429	0.382529	0.31163	0.354057	0.419219	0.379902	0.38201	0.32043	0.365934	0.337789	0.340019	NaN	NaN	NaN
70.2824	-39.235	0.404232	0.325669	0.399377	0.389401	0.227948	0.382529	0.31163	0.329192	0.437767	0.379901	0.382009	0.324744	0.368637	0.332019	0.340018	NaN	NaN	NaN
70.2841	-39.2172	0.404235	0.325669	0.380608	0.410599	0.231449	0.382529	0.31163	0.329192	0.437766	0.364562	0.388602	0.331219	0.363537	0.330094	0.340018	NaN	NaN	NaN
70.2857	-39.1993	0.404238	0.32567	0.368122	0.431961	0.231449	0.372173	0.325355	0.329191	0.437766	0.354346	0.392992	0.331218	0.363537	0.330093	0.338703	NaN	NaN	NaN
70.287	-39.186	0.404241	0.32567	0.368123	0.431962	0.231449	0.356662	0.345912	0.329191	0.437765	0.354345	0.392992	0.329058	0.366108	0.330093	0.334758	NaN	NaN	NaN
70.2887	-39.1681	0.404243	0.325671	0.368124	0.431963	0.220608	0.371699	0.345912	0.329191	0.412501	0.374375	0.383868	0.326691	0.373728	0.326127	0.332047	NaN	NaN	NaN
70.2904	-39.1503	0.404246	0.308858	0.392185	0.388345	0.227386	0.381705	0.318	0.36185	0.406192	0.379375	0.374751	0.322169	0.370843	0.333729	0.324102	NaN	NaN	NaN
70.2917	-39.137	0.404249	0.304667	0.398187	0.377463	0.230878	0.381705	0.311032	0.345154	0.424729	0.379375	0.367917	0.313395	0.365304	0.343211	0.320081	NaN	NaN	NaN
70.2934	-39.1192	0.404252	0.304667	0.398188	0.377464	0.230879	0.381705	0.297093	0.344919	0.43707	0.36916	0.363203	0.304583	0.354511	0.356477	0.314728	NaN	NaN	NaN
70.295	-39.1015	0.404255	0.304668	0.39819	0.377465	0.230879	0.366207	0.296756	0.369346	0.437069	0.353853	0.362958	0.300132	0.341265	0.363935	0.31592	NaN	NaN	NaN
70.2963	-39.0883	0.404257	0.304668	0.398191	0.377466	0.230879	0.355891	0.310429	0.369346	0.437069	0.353852	0.35841	0.297882	0.33853	0.365744	0.317171	NaN	NaN	NaN
70.2979	-39.0706	0.40426	0.304669	0.398193	0.377467	0.23088	0.355891	0.310429	0.369345	0.437068	0.353852	0.358409	0.297882	0.335927	0.361811	0.31711	NaN	NaN	NaN
70.2992	-39.0574	0.404263	0.304669	0.398194	0.377468	0.223666	0.365896	0.310429	0.369345	0.437068	0.353851	0.358409	0.300029	0.333367	0.357914	0.319692	NaN	NaN	NaN
70.3008	-39.0399	0.404266	0.30467	0.398196	0.377469	0.212865	0.380875	0.310429	0.352803	0.424182	0.37385	0.358408	0.308627	0.32833	0.35993	0.321065	NaN	NaN	NaN
70.3025	-39.0223	0.404269	0.30467	0.398197	0.37747	0.212865	0.380875	0.310429	0.328023	0.436367	0.373742	0.369698	0.30668	0.333664	0.354254	0.319794	NaN	NaN	NaN
70.3038	-39.0089	0.404271	0.304671	0.398199	0.377471	0.212866	0.365409	0.330929	0.328023	0.436367	0.358449	0.383098	0.30468	0.336352	0.350455	0.318501	NaN	NaN	NaN
70.3054	-38.9914	0.404274	0.304671	0.391956	0.388154	0.212866	0.355113	0.344573	0.328023	0.436366	0.353355	0.392116	0.302675	0.341649	0.350586	0.313331	NaN	NaN	NaN
70.3071	-38.9739	0.404277	0.304671	0.367031	0.430793	0.212866	0.355113	0.344573	0.328022	0.436366	0.353355	0.392115	0.309133	0.336562	0.352568	0.310746	NaN	NaN	NaN
70.3083	-38.9608	0.40428	0.292105	0.385028	0.430795	0.212867	0.355114	0.344573	0.328022	0.436365	0.353354	0.385285	0.315439	0.336561	0.358418	0.306866	NaN	NaN	NaN
70.31	-38.9434	0.404283	0.283751	0.396998	0.430796	0.212867	0.355114	0.344573	0.328022	0.436365	0.353353	0.380734	0.31964	0.336561	0.358417	0.301615	NaN	NaN	NaN
70.3116	-38.926	0.404285	0.283752	0.397	0.430797	0.212867	0.355114	0.344572	0.295011	0.460987	0.353353	0.380733	0.319639	0.33656	0.358417	0.300302	NaN	NaN	NaN
70.3128	-38.913	0.404288	0.283752	0.397002	0.430798	0.212868	0.355114	0.344572	0.286769	0.467133	0.343164	0.385112	0.319638	0.336559	0.356465	0.301595	NaN	NaN	NaN
70.3144	-38.8957	0.404291	0.283753	0.397003	0.430799	0.212868	0.334538	0.371838	0.286769	0.441947	0.347867	0.391673	0.311028	0.352027	0.34483	0.306766	NaN	NaN	NaN
70.3156	-38.8828	0.404294	0.283753	0.397005	0.4308	0.212868	0.329402	0.378644	0.286768	0.435658	0.352853	0.391672	0.308876	0.362411	0.339075	0.306765	NaN	NaN	NaN
70.3172	-38.8656	0.404297	0.283753	0.397006	0.430802	0.212869	0.329402	0.378644	0.286768	0.435658	0.352853	0.391671	0.308875	0.36241	0.339074	0.305452	NaN	NaN	NaN
70.3189	-38.8484	0.404299	0.283754	0.397008	0.430803	0.216467	0.324412	0.378644	0.286768	0.435657	0.352852	0.39167	0.306723	0.35715	0.337029	0.305374	NaN	NaN	NaN
70.3201	-38.8355	0.404302	0.283754	0.397009	0.409034	0.234261	0.309419	0.378644	0.286768	0.435657	0.352852	0.384847	0.306571	0.349196	0.346583	0.304041	NaN	NaN	NaN
70.3217	-38.8182	0.404305	0.283755	0.378346	0.408374	0.248324	0.304414	0.378644	0.253813	0.441371	0.367809	0.3803	0.308618	0.328319	0.356023	0.30265	NaN	NaN	NaN
70.3232	-38.801	0.404308	0.283755	0.365929	0.429616	0.248325	0.304414	0.378643	0.245585	0.434945	0.37268	0.377941	0.310664	0.315266	0.359711	0.302571	NaN	NaN	NaN
70.3244	-38.7881	0.404311	0.283756	0.365931	0.429617	0.241112	0.314421	0.378643	0.245585	0.434945	0.357428	0.377684	0.310507	0.320346	0.357728	0.301219	NaN	NaN	NaN
70.326	-38.7709	0.404314	0.283756	0.365932	0.429618	0.230311	0.329404	0.378643	0.245584	0.434944	0.352348	0.375326	0.312551	0.322904	0.34994	0.305071	NaN	NaN	NaN
70.3277	-38.7537	0.404316	0.283757	0.365934	0.418759	0.233796	0.329404	0.378643	0.245584	0.422383	0.362307	0.368518	0.318835	0.322903	0.347993	0.302428	NaN	NaN	NaN
70.3288	-38.7408	0.404319	0.283757	0.365935	0.38623	0.23344	0.328966	0.399056	0.245584	0.403563	0.377226	0.363979	0.316579	0.330579	0.347992	0.299807	NaN	NaN	NaN
70.3304	-38.7236	0.404322	0.283757	0.365937	0.375406	0.229732	0.328674	0.412641	0.245584	0.403562	0.377226	0.357177	0.318563	0.330491	0.351816	0.299806	NaN	NaN	NaN
70.332	-38.7065	0.404325	0.283758	0.365938	0.375407	0.215383	0.348577	0.412641	0.220903	0.421971	0.377225	0.357176	0.318562	0.322692	0.35755	0.298495	NaN	NaN	NaN
70.3332	-38.6936	0.404328	0.283758	0.36594	0.375408	0.211802	0.353543	0.412641	0.204472	0.434226	0.377224	0.357175	0.318561	0.322691	0.35755	0.294563	NaN	NaN	NaN
70.3348	-38.6765	0.40433	0.283759	0.353527	0.396644	0.211802	0.353544	0.384837	0.237014	0.434225	0.377224	0.357175	0.314268	0.320007	0.363282	0.293252	NaN	NaN	NaN
70.336	-38.6637	0.404333	0.283759	0.334946	0.428428	0.211803	0.353544	0.377896	0.245138	0.434225	0.367063	0.361543	0.307831	0.322478	0.367101	0.293251	NaN	NaN	NaN
70.3375	-38.6466	0.404336	0.28376	0.334947	0.428429	0.211803	0.353544	0.377896	0.245138	0.434224	0.351837	0.368089	0.30783	0.322477	0.3671	0.28801	NaN	NaN	NaN
70.3391	-38.6296	0.404339	0.28376	0.334949	0.428431	0.211803	0.353544	0.377896	0.245137	0.415416	0.366749	0.368088	0.307829	0.312086	0.374737	0.286699	NaN	NaN	NaN
70.3403	-38.6168	0.404342	0.283761	0.33495	0.428432	0.211804	0.353545	0.377896	0.245137	0.402892	0.376677	0.368087	0.307829	0.309489	0.370808	0.290571	NaN	NaN	NaN
70.3418	-38.5998	0.404344	0.283761	0.334952	0.428433	0.211804	0.353545	0.377896	0.245137	0.402891	0.376677	0.363554	0.312013	0.309488	0.366916	0.293151	NaN	NaN	NaN
70.3434	-38.5827	0.404347	0.283761	0.334953	0.428434	0.211805	0.353545	0.364011	0.23675	0.421267	0.376676	0.356758	0.318284	0.309487	0.366916	0.29184	NaN	NaN	NaN
70.3446	-38.5699	0.40435	0.279585	0.34094	0.428436	0.211805	0.353545	0.343213	0.244688	0.4335	0.376675	0.356757	0.311849	0.317153	0.366915	0.28791	NaN	NaN	NaN
70.3461	-38.5527	0.404353	0.262925	0.364829	0.428437	0.211805	0.353546	0.343213	0.244688	0.4335	0.376675	0.356757	0.307561	0.314471	0.370694	0.28789	NaN	NaN	NaN
70.3477	-38.5355	0.404356	0.262926	0.364831	0.428438	0.211806	0.353546	0.343213	0.244687	0.4335	0.376674	0.356756	0.307561	0.30928	0.36673	0.293049	NaN	NaN	NaN
70.3489	-38.5227	0.404358	0.262926	0.364832	0.428439	0.211806	0.353546	0.343213	0.244687	0.420977	0.386601	0.349962	0.31383	0.309279	0.366729	0.28912	NaN	NaN	NaN
70.3505	-38.5055	0.404361	0.262926	0.352455	0.449614	0.211807	0.353547	0.343213	0.244687	0.402216	0.401473	0.345436	0.318005	0.309278	0.364784	0.28779	NaN	NaN	NaN
70.3517	-38.4924	0.404364	0.262927	0.333928	0.481305	0.211807	0.353547	0.343213	0.244687	0.402216	0.391326	0.349799	0.318005	0.309278	0.358951	0.28773	NaN	NaN	NaN
70.3532	-38.4751	0.404367	0.262927	0.333929	0.481307	0.211807	0.353547	0.343213	0.228287	0.414448	0.376123	0.356337	0.309433	0.319489	0.357007	0.286401	NaN	NaN	NaN
70.3548	-38.4578	0.40437	0.262928	0.33393	0.481308	0.211808	0.353547	0.343213	0.203721	0.43277	0.376123	0.356337	0.30729	0.32204	0.351175	0.285032	NaN	NaN	NaN
70.356	-38.4448	0.404373	0.262928	0.333932	0.481309	0.208225	0.358517	0.343213	0.203721	0.420267	0.386034	0.354073	0.309378	0.322039	0.347288	0.2863	NaN	NaN	NaN
70.3575	-38.4274	0.404375	0.262929	0.333933	0.481311	0.193919	0.378356	0.343213	0.203721	0.401536	0.400882	0.345028	0.317724	0.322038	0.347287	0.281065	NaN	NaN	NaN
70.3591	-38.41	0.404378	0.262929	0.333935	0.481312	0.193919	0.373229	0.329225	0.228043	0.401535	0.400881	0.345027	0.31344	0.321951	0.345273	0.283623	NaN	NaN	NaN
70.3603	-38.3969	0.407699	0.258844	0.333936	0.448846	0.204337	0.357867	0.335749	0.244234	0.401535	0.400881	0.345027	0.307018	0.321819	0.347109	0.286198	NaN	NaN	NaN
70.3619	-38.3795	0.421024	0.242504	0.333937	0.427245	0.211269	0.352753	0.342526	0.244234	0.401535	0.40088	0.345026	0.307018	0.321819	0.347108	0.286198	NaN	NaN	NaN
70.3634	-38.3619	0.421025	0.225941	0.357773	0.427246	0.211269	0.352754	0.342526	0.244234	0.401534	0.400879	0.345025	0.307017	0.321818	0.347108	0.286197	NaN	NaN	NaN
70.3646	-38.3487	0.421027	0.221812	0.363718	0.427247	0.21127	0.352754	0.342526	0.244233	0.401534	0.400879	0.345025	0.307016	0.321817	0.347107	0.286197	NaN	NaN	NaN
70.3662	-38.331	0.421028	0.221813	0.36372	0.427249	0.207696	0.357711	0.342526	0.244233	0.401534	0.400878	0.345024	0.304875	0.324366	0.34128	0.29006	NaN	NaN	NaN
70.3678	-38.3133	0.421029	0.221813	0.363721	0.42725	0.193424	0.377503	0.342526	0.244233	0.401533	0.400878	0.345023	0.296317	0.334558	0.337396	0.292634	NaN	NaN	NaN
70.369	-38.3	0.42103	0.221813	0.363723	0.427251	0.193424	0.377503	0.342526	0.244233	0.401533	0.400877	0.345023	0.296317	0.331964	0.339302	0.292633	NaN	NaN	NaN
70.3706	-38.2823	0.421031	0.221814	0.363724	0.427252	0.193424	0.377503	0.342526	0.244233	0.401532	0.390745	0.34938	0.296316	0.321595	0.346926	0.292633	NaN	NaN	NaN
70.3718	-38.2689	0.421033	0.221814	0.363726	0.427254	0.193425	0.377504	0.328693	0.260421	0.401532	0.375563	0.355909	0.296315	0.321594	0.346925	0.288708	NaN	NaN	NaN
70.3733	-38.2511	0.421034	0.221815	0.363727	0.427255	0.193425	0.377504	0.307974	0.284666	0.401532	0.375562	0.355908	0.296315	0.321594	0.346924	0.286092	NaN	NaN	NaN
70.3749	-38.2333	0.421035	0.221815	0.363729	0.427256	0.193426	0.377504	0.307974	0.284666	0.401531	0.375562	0.34687	0.300379	0.326688	0.3411	0.289953	NaN	NaN	NaN
70.3761	-38.2199	0.421036	0.221816	0.363731	0.427258	0.193426	0.377505	0.307974	0.284666	0.401531	0.375561	0.344611	0.29605	0.334325	0.337217	0.292526	NaN	NaN	NaN
70.3777	-38.202	0.421037	0.221816	0.363732	0.394876	0.203816	0.377505	0.307974	0.284666	0.401531	0.375561	0.344611	0.29605	0.334324	0.337217	0.28991	NaN	NaN	NaN
70.3793	-38.1842	0.421039	0.221816	0.363734	0.373333	0.200039	0.392328	0.307974	0.284666	0.40153	0.37556	0.34461	0.296049	0.334323	0.333334	0.288561	NaN	NaN	NaN
70.3806	-38.1708	0.42104	0.221817	0.363735	0.373334	0.192926	0.402191	0.301068	0.292746	0.40153	0.37556	0.340093	0.300217	0.334322	0.327513	0.292419	NaN	NaN	NaN
70.3821	-38.153	0.421041	0.221817	0.363737	0.373335	0.192927	0.402192	0.273486	0.325018	0.40153	0.375559	0.333323	0.306463	0.323958	0.335135	0.292419	NaN	NaN	NaN
70.3837	-38.1351	0.421042	0.221818	0.363738	0.373336	0.192927	0.402192	0.273486	0.325018	0.401529	0.375559	0.333322	0.306462	0.321367	0.335098	0.293705	NaN	NaN	NaN
70.3849	-38.1217	0.421044	0.221818	0.36374	0.373337	0.192927	0.402192	0.273486	0.325018	0.401529	0.375558	0.333322	0.302188	0.326458	0.329279	0.29364	NaN	NaN	NaN
70.3865	-38.1038	0.421045	0.221818	0.363742	0.373338	0.192928	0.402193	0.273486	0.308649	0.413739	0.375558	0.333321	0.29578	0.323731	0.334957	0.292311	NaN	NaN	NaN
70.3877	-38.0904	0.421046	0.221819	0.363743	0.373339	0.192928	0.402193	0.273486	0.284131	0.432028	0.375557	0.333321	0.295779	0.321142	0.336859	0.29231	NaN	NaN	NaN
70.3893	-38.0725	0.421047	0.221819	0.363745	0.373341	0.192929	0.402193	0.273486	0.284131	0.432027	0.365438	0.337673	0.295779	0.31079	0.34447	0.29231	NaN	NaN	NaN
70.3908	-38.0546	0.421048	0.22182	0.363746	0.373342	0.192929	0.402194	0.273486	0.284131	0.432027	0.350276	0.344194	0.295778	0.308202	0.344433	0.293595	NaN	NaN	NaN
70.392	-38.0411	0.42105	0.22182	0.363748	0.373343	0.192929	0.402194	0.273486	0.28413	0.432026	0.350275	0.344193	0.295778	0.308202	0.338617	0.29745	NaN	NaN	NaN
70.3936	-38.0232	0.421051	0.221821	0.363749	0.373344	0.19293	0.386857	0.293817	0.28413	0.432026	0.350275	0.344192	0.295777	0.308201	0.336678	0.298734	NaN	NaN	NaN
70.3952	-38.0054	0.421052	0.221821	0.363751	0.373345	0.19293	0.376648	0.307349	0.28413	0.425783	0.355224	0.344192	0.295776	0.3082	0.336677	0.298733	NaN	NaN	NaN
70.3964	-37.9919	0.421053	0.221821	0.363752	0.373346	0.192931	0.376648	0.307349	0.28413	0.407073	0.370057	0.344191	0.295776	0.308199	0.336677	0.298733	NaN	NaN	NaN
70.3979	-37.974	0.421055	0.221822	0.363754	0.373348	0.192931	0.376649	0.307349	0.28413	0.400842	0.374996	0.34419	0.289369	0.315829	0.336676	0.298732	NaN	NaN	NaN
70.3994	-37.9561	0.421056	0.221822	0.363756	0.373349	0.192931	0.376649	0.307349	0.28413	0.400842	0.374995	0.34419	0.285101	0.320911	0.336675	0.298732	NaN	NaN	NaN
70.4006	-37.9426	0.421057	0.221823	0.363757	0.37335	0.192932	0.376649	0.307349	0.28413	0.400842	0.374995	0.344189	0.2851	0.32091	0.336674	0.298731	NaN	NaN	NaN
70.4022	-37.9247	0.421058	0.221823	0.363759	0.373351	0.192932	0.37665	0.321131	0.268002	0.400841	0.374994	0.344188	0.2851	0.32091	0.336674	0.294811	NaN	NaN	NaN
70.4038	-37.9068	0.421059	0.221824	0.36376	0.373352	0.192933	0.37665	0.341835	0.227434	0.413029	0.374994	0.344188	0.285099	0.320909	0.332797	0.294767	NaN	NaN	NaN
70.4049	-37.8933	0.421061	0.221824	0.363762	0.373353	0.185821	0.386512	0.341835	0.202958	0.431284	0.374993	0.344187	0.285098	0.313149	0.33269	0.298619	NaN	NaN	NaN
70.4065	-37.8753	0.421062	0.221824	0.363763	0.373354	0.175172	0.401276	0.341835	0.202958	0.431284	0.374992	0.346442	0.283016	0.307978	0.336491	0.298619	NaN	NaN	NaN
70.4077	-37.8618	0.421063	0.221825	0.363765	0.373356	0.175172	0.401277	0.341835	0.202958	0.431283	0.374992	0.353211	0.276764	0.307977	0.336491	0.298618	NaN	NaN	NaN
70.4092	-37.8438	0.421064	0.221825	0.363767	0.373357	0.175173	0.401277	0.341835	0.202958	0.431283	0.359838	0.361984	0.274679	0.307976	0.33649	0.298617	NaN	NaN	NaN
70.4108	-37.8257	0.421066	0.221826	0.363768	0.373358	0.175173	0.401277	0.341835	0.202958	0.431283	0.349746	0.366322	0.274678	0.307975	0.336489	0.298617	NaN	NaN	NaN
70.4109	-37.8194	0.421067	0.221826	0.36377	0.373359	0.175174	0.401278	0.341835	0.202958	0.431282	0.349746	0.370836	0.270508	0.307975	0.336488	0.29731	NaN	NaN	NaN
70.412	-37.8046	0.421068	0.221827	0.363771	0.37336	0.175174	0.401278	0.341835	0.202958	0.431282	0.349745	0.377611	0.264247	0.302803	0.336415	0.294654	NaN	NaN	NaN
70.4136	-37.7872	0.421069	0.221827	0.363773	0.373361	0.175174	0.401279	0.341835	0.202958	0.431282	0.349745	0.377611	0.264246	0.29505	0.336305	0.298504	NaN	NaN	NaN
70.4147	-37.774	0.42107	0.221827	0.363774	0.373362	0.175175	0.401279	0.341835	0.202958	0.431281	0.349744	0.37761	0.264246	0.29505	0.336304	0.298503	NaN	NaN	NaN
70.4162	-37.7565	0.421072	0.221828	0.363776	0.373364	0.175175	0.40128	0.341835	0.202958	0.431281	0.349744	0.377609	0.264245	0.295049	0.336304	0.298503	NaN	NaN	NaN
70.4177	-37.739	0.421073	0.221828	0.363777	0.373365	0.175175	0.40128	0.341835	0.202957	0.431281	0.349743	0.377609	0.264245	0.295048	0.336303	0.298502	NaN	NaN	NaN
70.4189	-37.7258	0.421074	0.221829	0.363779	0.373366	0.175176	0.40128	0.341835	0.202957	0.43128	0.349743	0.377608	0.264244	0.295048	0.336302	0.298502	NaN	NaN	NaN
70.4204	-37.7082	0.421075	0.221829	0.363781	0.373367	0.175176	0.401281	0.341835	0.202957	0.43128	0.349742	0.377607	0.264243	0.295047	0.336301	0.298501	NaN	NaN	NaN
70.4215	-37.695	0.421077	0.22183	0.363782	0.373368	0.175177	0.401281	0.341835	0.202957	0.431279	0.349742	0.37083	0.270503	0.295046	0.336301	0.298501	NaN	NaN	NaN
70.423	-37.6774	0.421078	0.22183	0.363784	0.373369	0.175177	0.401282	0.341835	0.202957	0.431279	0.349741	0.366316	0.274672	0.295046	0.3363	0.2985	NaN	NaN	NaN
70.4246	-37.6597	0.421079	0.22183	0.363785	0.373371	0.175177	0.401282	0.341835	0.202957	0.431279	0.349741	0.366315	0.274671	0.295045	0.336299	0.298499	NaN	NaN	NaN
70.4257	-37.6465	0.42108	0.221831	0.363787	0.373372	0.175178	0.401282	0.341835	0.202957	0.431278	0.34974	0.366314	0.274671	0.295044	0.336298	0.298499	NaN	NaN	NaN
70.4272	-37.6287	0.421081	0.221831	0.363788	0.373373	0.175178	0.401283	0.341835	0.202957	0.431278	0.34974	0.366313	0.27467	0.295044	0.344043	0.293363	NaN	NaN	NaN
70.4287	-37.6109	0.421083	0.221832	0.36379	0.373374	0.175178	0.401283	0.341835	0.202957	0.431278	0.34974	0.366313	0.274669	0.295043	0.345979	0.292078	NaN	NaN	NaN
70.4299	-37.5976	0.421084	0.221832	0.363791	0.373375	0.175179	0.401284	0.341835	0.202957	0.431277	0.349739	0.366312	0.274669	0.295042	0.345979	0.292078	NaN	NaN	NaN
70.4314	-37.5798	0.421085	0.221832	0.363793	0.373376	0.175179	0.401284	0.341835	0.202957	0.431277	0.349739	0.366311	0.274668	0.295041	0.345978	0.292077	NaN	NaN	NaN
70.4329	-37.562	0.421086	0.221833	0.363795	0.373377	0.17518	0.401284	0.341835	0.202957	0.425044	0.35468	0.366311	0.274668	0.297624	0.344078	0.292077	NaN	NaN	NaN
70.4341	-37.5486	0.421088	0.221833	0.363796	0.373379	0.17518	0.401285	0.341835	0.202956	0.406365	0.369488	0.36631	0.274667	0.305377	0.338377	0.292076	NaN	NaN	NaN
70.4356	-37.5307	0.421089	0.221834	0.363798	0.37338	0.17518	0.401285	0.341835	0.202956	0.400144	0.374419	0.366309	0.274666	0.307962	0.336475	0.292075	NaN	NaN	NaN
70.437	-37.5129	0.42109	0.221834	0.363799	0.373381	0.175181	0.401286	0.341835	0.202956	0.400144	0.374419	0.366309	0.274666	0.307961	0.336474	0.292075	NaN	NaN	NaN
70.4382	-37.4995	0.421091	0.221835	0.363801	0.373382	0.175181	0.401286	0.341835	0.202956	0.400144	0.374418	0.366308	0.274665	0.30796	0.336473	0.292074	NaN	NaN	NaN
70.4397	-37.4816	0.421092	0.221835	0.363802	0.373383	0.175181	0.401286	0.341835	0.202956	0.400143	0.374418	0.375338	0.266322	0.31313	0.332671	0.292074	NaN	NaN	NaN
70.4408	-37.4682	0.421094	0.221835	0.363804	0.373384	0.175182	0.401287	0.341835	0.202956	0.400143	0.374417	0.377596	0.257832	0.328511	0.326964	0.292073	NaN	NaN	NaN
70.4426	-37.4519	0.421095	0.221836	0.363806	0.373385	0.175182	0.401287	0.328029	0.219113	0.400143	0.374417	0.37082	0.259826	0.333588	0.326963	0.292073	NaN	NaN	NaN
70.4442	-37.4356	0.421096	0.221836	0.363807	0.373387	0.175183	0.401288	0.30735	0.243312	0.400142	0.374416	0.366305	0.263996	0.336173	0.325061	0.292072	NaN	NaN	NaN
70.4453	-37.4227	0.421097	0.221837	0.363809	0.373388	0.175183	0.401288	0.30735	0.243312	0.400142	0.374416	0.366304	0.263995	0.343933	0.319351	0.292072	NaN	NaN	NaN
70.4467	-37.4055	0.421099	0.221837	0.36381	0.373389	0.175183	0.401288	0.30735	0.243312	0.400142	0.374415	0.366304	0.263994	0.34652	0.317446	0.292071	NaN	NaN	NaN
70.4481	-37.3884	0.4211	0.221838	0.363812	0.37339	0.175184	0.401289	0.30735	0.243312	0.400141	0.374415	0.357277	0.27233	0.346519	0.317445	0.29207	NaN	NaN	NaN
70.4492	-37.3756	0.421101	0.221838	0.363813	0.373391	0.175184	0.401289	0.30735	0.243312	0.400141	0.374414	0.355022	0.274412	0.346519	0.319382	0.290786	NaN	NaN	NaN
70.4506	-37.3585	0.421102	0.221838	0.363815	0.373392	0.175184	0.40129	0.30735	0.243312	0.400141	0.374414	0.355021	0.274411	0.346518	0.327133	0.285646	NaN	NaN	NaN
70.4521	-37.3414	0.421104	0.221839	0.363816	0.373394	0.175185	0.40129	0.30735	0.243312	0.40014	0.374413	0.355021	0.274411	0.346517	0.332947	0.281791	NaN	NaN	NaN
70.4532	-37.3285	0.421105	0.221839	0.363818	0.373395	0.175185	0.40129	0.30735	0.243312	0.40014	0.374413	0.35953	0.270245	0.346516	0.336824	0.279219	NaN	NaN	NaN
70.4546	-37.3113	0.421106	0.22184	0.36382	0.373396	0.175186	0.401291	0.300458	0.251377	0.40014	0.374412	0.3663	0.266123	0.343977	0.340701	0.276647	NaN	NaN	NaN
70.4557	-37.2984	0.421107	0.22184	0.363821	0.373397	0.175186	0.401291	0.279805	0.275542	0.400139	0.374411	0.373071	0.266267	0.336357	0.346518	0.274094	NaN	NaN	NaN
70.4572	-37.2811	0.421109	0.221841	0.363823	0.373398	0.175186	0.401292	0.27293	0.283588	0.400139	0.374411	0.377588	0.264227	0.336402	0.344614	0.279319	NaN	NaN	NaN
70.4586	-37.2638	0.42111	0.221841	0.363824	0.373399	0.175187	0.401292	0.27293	0.283587	0.400139	0.37441	0.377587	0.264227	0.346756	0.333119	0.281891	NaN	NaN	NaN
70.4597	-37.2507	0.421111	0.221841	0.363826	0.3734	0.175187	0.401292	0.27293	0.283587	0.400138	0.37441	0.373069	0.264131	0.351837	0.327301	0.285748	NaN	NaN	NaN
70.4611	-37.2333	0.421112	0.221842	0.363827	0.373402	0.175187	0.401293	0.27293	0.283587	0.400138	0.374409	0.364039	0.266073	0.356863	0.323388	0.28699	NaN	NaN	NaN
70.4626	-37.2159	0.421113	0.221842	0.363829	0.373403	0.175188	0.401293	0.27293	0.283587	0.400138	0.374409	0.35276	0.267961	0.356662	0.321313	0.28819	NaN	NaN	NaN
70.4637	-37.2027	0.421115	0.221843	0.363831	0.373404	0.175188	0.401294	0.27293	0.283587	0.400137	0.374408	0.345997	0.267813	0.359095	0.31737	0.289409	NaN	NaN	NaN
70.4651	-37.1851	0.421116	0.221843	0.363832	0.373405	0.175189	0.401294	0.27293	0.283587	0.400137	0.374408	0.343744	0.263505	0.35894	0.317267	0.286732	NaN	NaN	NaN
70.4666	-37.1674	0.421117	0.221844	0.363834	0.373406	0.175189	0.401294	0.27293	0.283587	0.400137	0.374407	0.345996	0.261424	0.358939	0.317266	0.285427	NaN	NaN	NaN
70.4677	-37.1541	0.421118	0.221844	0.363835	0.373407	0.175189	0.401295	0.27293	0.283587	0.400136	0.374407	0.352757	0.255178	0.358939	0.317265	0.285426	NaN	NaN	NaN
70.4691	-37.1364	0.42112	0.221844	0.363837	0.373408	0.17519	0.401295	0.27293	0.283587	0.400136	0.369361	0.357182	0.257353	0.353869	0.317265	0.285425	NaN	NaN	NaN
70.4702	-37.1231	0.421121	0.221845	0.363838	0.37341	0.17519	0.401296	0.27293	0.283587	0.400136	0.354236	0.363684	0.263744	0.34626	0.317264	0.285425	NaN	NaN	NaN
70.4717	-37.1053	0.421122	0.221845	0.36384	0.373411	0.175191	0.380895	0.299973	0.283587	0.400135	0.349198	0.359086	0.26999	0.34626	0.317263	0.285424	NaN	NaN	NaN
70.4732	-37.0875	0.421123	0.221846	0.363841	0.373412	0.175191	0.375803	0.306722	0.283586	0.400135	0.349197	0.35458	0.27415	0.346259	0.313389	0.287991	NaN	NaN	NaN
70.4742	-37.0742	0.421125	0.221846	0.363843	0.373413	0.175191	0.375803	0.306722	0.283586	0.400135	0.349197	0.35458	0.272019	0.348795	0.307581	0.29184	NaN	NaN	NaN
70.4757	-37.0564	0.421126	0.221846	0.363845	0.373414	0.175192	0.375804	0.306722	0.283586	0.381475	0.363989	0.354579	0.2635	0.358934	0.30758	0.287924	NaN	NaN	NaN
70.4772	-37.0386	0.421127	0.221847	0.363846	0.373415	0.175192	0.375804	0.306722	0.283586	0.369051	0.373837	0.354578	0.263499	0.358933	0.30758	0.285314	NaN	NaN	NaN
70.4782	-37.0253	0.421128	0.221847	0.363848	0.373417	0.175192	0.375805	0.306722	0.283586	0.369051	0.373837	0.354578	0.263499	0.353761	0.311384	0.285313	NaN	NaN	NaN
70.4797	-37.0076	0.42113	0.221848	0.345337	0.405082	0.175193	0.375805	0.306722	0.283586	0.36905	0.373836	0.354577	0.263498	0.346007	0.317088	0.280094	NaN	NaN	NaN
70.4811	-36.9898	0.421131	0.221848	0.333024	0.426147	0.175193	0.375805	0.306722	0.283586	0.36905	0.373836	0.354576	0.254983	0.345807	0.316949	0.283921	NaN	NaN	NaN
70.4822	-36.9765	0.421132	0.221849	0.333025	0.426148	0.175194	0.375806	0.327361	0.259435	0.36905	0.373835	0.354576	0.252855	0.345756	0.316914	0.285203	NaN	NaN	NaN
70.4837	-36.9588	0.41122	0.234068	0.333027	0.42615	0.175194	0.375806	0.341141	0.24331	0.36905	0.373835	0.347818	0.254841	0.350819	0.313044	0.286463	NaN	NaN	NaN
70.4851	-36.9411	0.404638	0.242215	0.333028	0.426151	0.175194	0.360532	0.361383	0.24331	0.369049	0.373834	0.343316	0.252619	0.358409	0.307241	0.285091	NaN	NaN	NaN
70.4862	-36.9277	0.404641	0.242215	0.33303	0.426152	0.175195	0.350365	0.374856	0.24331	0.369049	0.373834	0.343315	0.252619	0.358409	0.30724	0.285091	NaN	NaN	NaN
70.4876	-36.9101	0.404644	0.242216	0.333031	0.426154	0.175195	0.350366	0.374856	0.243309	0.369049	0.373833	0.347816	0.254839	0.361148	0.303505	0.282527	NaN	NaN	NaN
70.4887	-36.8968	0.404647	0.242216	0.333032	0.426155	0.175195	0.350366	0.374856	0.243309	0.369048	0.373833	0.356825	0.257156	0.353654	0.309376	0.276114	NaN	NaN	NaN
70.4901	-36.8791	0.40465	0.242217	0.333034	0.426156	0.175196	0.350367	0.374856	0.243309	0.387688	0.359056	0.36584	0.261604	0.348785	0.313381	0.271021	NaN	NaN	NaN
70.4916	-36.8615	0.404652	0.238074	0.338986	0.426158	0.175196	0.350367	0.374856	0.243309	0.40013	0.349191	0.37486	0.263927	0.338684	0.323097	0.271144	NaN	NaN	NaN
70.4927	-36.8483	0.404655	0.225673	0.356804	0.426159	0.175197	0.350367	0.374856	0.243309	0.40013	0.34919	0.377116	0.263974	0.343905	0.325138	0.272531	NaN	NaN	NaN
70.4941	-36.8306	0.404658	0.221549	0.362733	0.42616	0.175197	0.350368	0.374856	0.243309	0.40013	0.34919	0.374858	0.266058	0.346492	0.327109	0.275182	NaN	NaN	NaN
70.4955	-36.8129	0.404661	0.221549	0.362734	0.426162	0.175197	0.350368	0.374856	0.226999	0.412295	0.349189	0.365837	0.270126	0.351568	0.319357	0.28032	NaN	NaN	NaN
70.4965	-36.7997	0.404664	0.22155	0.362736	0.426163	0.175198	0.350368	0.374856	0.202569	0.430516	0.349189	0.365836	0.263732	0.354002	0.319289	0.280278	NaN	NaN	NaN
70.498	-36.782	0.404667	0.22155	0.362737	0.426164	0.175198	0.350369	0.374856	0.202569	0.424293	0.354122	0.365836	0.25734	0.353852	0.315313	0.284086	NaN	NaN	NaN
70.4994	-36.7643	0.40467	0.221551	0.362739	0.426166	0.175198	0.350369	0.374856	0.202569	0.399435	0.373829	0.36358	0.253035	0.353698	0.311339	0.286588	NaN	NaN	NaN
70.5005	-36.751	0.404672	0.221551	0.362741	0.426167	0.175199	0.35037	0.374856	0.202569	0.393223	0.378753	0.354565	0.254976	0.353544	0.311237	0.290435	NaN	NaN	NaN
70.5019	-36.7332	0.404675	0.217425	0.368673	0.426168	0.175199	0.35037	0.374857	0.202569	0.368403	0.398426	0.338806	0.263146	0.350808	0.3111	0.290345	NaN	NaN	NaN
70.503	-36.7199	0.404678	0.205076	0.386432	0.42617	0.1752	0.35037	0.374857	0.202569	0.3622	0.403342	0.32981	0.265074	0.350652	0.312931	0.291604	NaN	NaN	NaN
70.5044	-36.7021	0.404681	0.200969	0.392341	0.426171	0.1752	0.350371	0.374857	0.202569	0.33742	0.422979	0.32082	0.271246	0.348021	0.308994	0.296729	NaN	NaN	NaN
70.5058	-36.6844	0.404684	0.20097	0.392343	0.426172	0.1752	0.350371	0.374857	0.170027	0.361695	0.422979	0.325313	0.258601	0.350393	0.312756	0.298009	NaN	NaN	NaN
70.5069	-36.6711	0.404687	0.20097	0.392345	0.426174	0.175201	0.350372	0.354195	0.186085	0.367755	0.422978	0.332057	0.252372	0.345234	0.312685	0.30057	NaN	NaN	NaN
70.5083	-36.6534	0.404689	0.20097	0.392346	0.426175	0.175201	0.350372	0.340441	0.202182	0.367755	0.422978	0.332056	0.248124	0.350289	0.306888	0.303106	NaN	NaN	NaN
70.5097	-36.6358	0.404692	0.200971	0.392348	0.426176	0.175202	0.350372	0.340441	0.202182	0.367754	0.422977	0.332056	0.241756	0.357866	0.306887	0.29789	NaN	NaN	NaN
70.5107	-36.6226	0.404695	0.200971	0.39235	0.426178	0.175202	0.350373	0.340441	0.202182	0.367754	0.422977	0.332055	0.241755	0.357865	0.306887	0.29789	NaN	NaN	NaN
70.5121	-36.6051	0.404698	0.200971	0.392352	0.426179	0.175202	0.350373	0.340441	0.202182	0.367754	0.422976	0.332055	0.241754	0.363022	0.303091	0.297889	NaN	NaN	NaN
70.5135	-36.5876	0.404701	0.200972	0.392354	0.42618	0.175203	0.350373	0.340441	0.202182	0.367754	0.422976	0.332054	0.241754	0.37076	0.289666	0.301705	NaN	NaN	NaN
70.5145	-36.5745	0.404704	0.200972	0.392355	0.426182	0.175203	0.350374	0.333563	0.210231	0.367753	0.422975	0.332053	0.241753	0.370759	0.287734	0.299074	NaN	NaN	NaN
70.5159	-36.557	0.404707	0.200973	0.392357	0.426183	0.175203	0.350374	0.306091	0.24238	0.367753	0.422975	0.332053	0.241753	0.370759	0.287733	0.29777	NaN	NaN	NaN
70.5172	-36.5394	0.404709	0.200973	0.392359	0.426184	0.175204	0.335131	0.326292	0.226131	0.379874	0.422974	0.329803	0.243829	0.370758	0.285801	0.299049	NaN	NaN	NaN
70.5183	-36.5263	0.404712	0.200973	0.392361	0.426186	0.175204	0.324986	0.339736	0.201792	0.398029	0.422973	0.32306	0.250055	0.370757	0.280007	0.302886	NaN	NaN	NaN
70.5197	-36.5087	0.404715	0.196865	0.398273	0.426187	0.175205	0.324986	0.339736	0.201792	0.398028	0.4129	0.325148	0.252128	0.370756	0.278076	0.304164	NaN	NaN	NaN
70.5207	-36.4955	0.404718	0.184567	0.415973	0.426188	0.175205	0.324987	0.339736	0.201792	0.398028	0.397807	0.331641	0.252127	0.370755	0.278075	0.304163	NaN	NaN	NaN
70.5221	-36.4779	0.404721	0.180478	0.421863	0.42619	0.175205	0.324987	0.326011	0.217855	0.398028	0.397807	0.331641	0.252127	0.370754	0.270352	0.309276	NaN	NaN	NaN
70.5235	-36.4602	0.404724	0.180478	0.421865	0.426191	0.175206	0.324987	0.305454	0.241911	0.398028	0.397806	0.33164	0.252126	0.370753	0.268422	0.310553	NaN	NaN	NaN
70.5245	-36.4469	0.404726	0.180478	0.421867	0.426193	0.175206	0.324988	0.305454	0.241911	0.398027	0.397806	0.327147	0.256273	0.370753	0.268422	0.310553	NaN	NaN	NaN
70.5259	-36.4291	0.404729	0.180479	0.421869	0.426194	0.175206	0.324988	0.305454	0.24191	0.398027	0.397805	0.320413	0.262489	0.363012	0.274119	0.310552	NaN	NaN	NaN
70.5273	-36.4112	0.404732	0.180479	0.421871	0.426195	0.175207	0.319915	0.312178	0.24191	0.398027	0.392774	0.322577	0.262488	0.357855	0.277915	0.310552	NaN	NaN	NaN
70.5284	-36.3978	0.404735	0.180479	0.421873	0.426197	0.175207	0.304713	0.332321	0.24191	0.391835	0.382603	0.329065	0.262488	0.357854	0.277914	0.310551	NaN	NaN	NaN
70.5298	-36.38	0.404738	0.18048	0.421875	0.426198	0.175208	0.299653	0.325328	0.25794	0.367098	0.397188	0.331225	0.262487	0.357853	0.277914	0.31055	NaN	NaN	NaN
70.5311	-36.3622	0.404741	0.18048	0.421877	0.426199	0.175208	0.299654	0.304812	0.281947	0.367098	0.397187	0.331224	0.262486	0.357852	0.277913	0.31055	NaN	NaN	NaN
70.5322	-36.3489	0.404744	0.188665	0.410097	0.426201	0.175208	0.299654	0.304812	0.281947	0.367098	0.397187	0.331223	0.262486	0.357851	0.277912	0.310549	NaN	NaN	NaN
70.5336	-36.3311	0.404746	0.200978	0.392382	0.426202	0.175209	0.299654	0.304812	0.281947	0.367097	0.397186	0.331223	0.262485	0.35785	0.277912	0.310548	NaN	NaN	NaN
70.5346	-36.3179	0.404749	0.200978	0.392384	0.426203	0.175209	0.299655	0.304812	0.281947	0.367097	0.382122	0.337703	0.262485	0.35785	0.277911	0.310548	NaN	NaN	NaN
70.536	-36.3002	0.404752	0.200979	0.392385	0.426205	0.175209	0.299655	0.304812	0.281947	0.367097	0.37209	0.342017	0.262484	0.35527	0.279809	0.306639	NaN	NaN	NaN
70.5374	-36.2825	0.404755	0.200979	0.392387	0.426206	0.17521	0.299655	0.304813	0.281947	0.342387	0.391674	0.342016	0.262484	0.344959	0.287397	0.304033	NaN	NaN	NaN
70.5383	-36.2693	0.404758	0.200979	0.392389	0.426207	0.17521	0.299656	0.304813	0.281947	0.336218	0.396563	0.342016	0.262483	0.344958	0.287397	0.304033	NaN	NaN	NaN
70.5397	-36.2516	0.404761	0.20098	0.392391	0.426209	0.175211	0.299656	0.277487	0.31392	0.336218	0.396563	0.342015	0.262482	0.344957	0.287396	0.304032	NaN	NaN	NaN
70.5411	-36.2339	0.404763	0.20098	0.392392	0.42621	0.175211	0.279424	0.297475	0.3219	0.336218	0.391546	0.344172	0.262482	0.344956	0.287395	0.304032	NaN	NaN	NaN
70.5421	-36.2206	0.404766	0.20098	0.392394	0.426211	0.175211	0.274375	0.304166	0.3219	0.336217	0.376511	0.350638	0.258238	0.344853	0.291188	0.304031	NaN	NaN	NaN
70.5435	-36.2029	0.404769	0.200981	0.392396	0.426213	0.175212	0.274375	0.304166	0.3219	0.336217	0.371503	0.352791	0.251876	0.344696	0.296874	0.301425	NaN	NaN	NaN
70.5448	-36.1851	0.404772	0.200981	0.392398	0.426214	0.175212	0.274375	0.304166	0.3219	0.336217	0.371502	0.35279	0.251875	0.344695	0.296873	0.297518	NaN	NaN	NaN
70.5458	-36.1717	0.404775	0.200982	0.392399	0.426215	0.175212	0.274376	0.304166	0.3219	0.323876	0.381283	0.35279	0.251875	0.342119	0.29298	0.301352	NaN	NaN	NaN
70.5471	-36.1539	0.404778	0.200982	0.392401	0.426217	0.175213	0.274376	0.304167	0.3219	0.305388	0.395934	0.352789	0.243396	0.341912	0.296701	0.303906	NaN	NaN	NaN
70.5485	-36.136	0.404781	0.200982	0.392403	0.426218	0.175213	0.274376	0.304167	0.3219	0.305388	0.395934	0.352788	0.234922	0.351994	0.2967	0.302603	NaN	NaN	NaN
70.5495	-36.1227	0.404783	0.200983	0.392405	0.426219	0.175214	0.274377	0.304167	0.3219	0.305388	0.395933	0.352788	0.239156	0.346954	0.290915	0.302529	NaN	NaN	NaN
70.5509	-36.1049	0.404786	0.200983	0.392407	0.426221	0.161031	0.294047	0.304167	0.3219	0.305388	0.380913	0.359246	0.260354	0.321721	0.287059	0.30378	NaN	NaN	NaN
70.5519	-36.0915	0.404789	0.200983	0.392408	0.426222	0.157493	0.298955	0.304167	0.3219	0.305387	0.370911	0.363546	0.26672	0.31414	0.287059	0.303779	NaN	NaN	NaN
70.5533	-36.0737	0.404792	0.200984	0.39241	0.426223	0.157493	0.298956	0.304167	0.313789	0.311439	0.37091	0.35906	0.258133	0.329294	0.279349	0.306281	NaN	NaN	NaN
70.5546	-36.056	0.404795	0.200984	0.392412	0.426225	0.157493	0.298956	0.304167	0.281393	0.335611	0.37091	0.352338	0.247391	0.34947	0.277422	0.303653	NaN	NaN	NaN
70.5556	-36.0427	0.404798	0.200985	0.392414	0.426226	0.157494	0.298956	0.304167	0.281393	0.33561	0.37091	0.352337	0.24104	0.357027	0.277421	0.303652	NaN	NaN	NaN
70.557	-36.025	0.404801	0.200985	0.392415	0.426227	0.157494	0.298957	0.304168	0.281393	0.33561	0.370909	0.352336	0.243155	0.354507	0.277421	0.301049	NaN	NaN	NaN
70.5583	-36.0073	0.404803	0.200985	0.392417	0.426229	0.157494	0.298957	0.304168	0.281393	0.33561	0.370909	0.352336	0.251626	0.344425	0.27742	0.297146	NaN	NaN	NaN
70.5593	-35.9941	0.404806	0.200986	0.392419	0.42623	0.157495	0.298958	0.304168	0.281393	0.33561	0.370908	0.352335	0.251625	0.344425	0.27742	0.297145	NaN	NaN	NaN
70.5606	-35.9765	0.404809	0.200986	0.392421	0.426231	0.157495	0.298958	0.304168	0.281393	0.33561	0.370908	0.350094	0.253695	0.344424	0.277419	0.294543	NaN	NaN	NaN
70.5619	-35.9589	0.404812	0.200986	0.392422	0.426233	0.157495	0.298958	0.304168	0.281393	0.335609	0.370907	0.341137	0.255612	0.351985	0.277418	0.290641	NaN	NaN	NaN
70.5629	-35.9457	0.41136	0.192889	0.392424	0.426234	0.157496	0.298959	0.304168	0.281393	0.335609	0.370907	0.341137	0.251379	0.357022	0.277418	0.29064	NaN	NaN	NaN
70.5643	-35.9282	0.421213	0.180742	0.392426	0.426235	0.157496	0.298959	0.304168	0.281392	0.335609	0.370907	0.341136	0.251378	0.354447	0.279312	0.285438	NaN	NaN	NaN
70.5653	-35.9151	0.421214	0.180742	0.392428	0.426237	0.157496	0.298959	0.304168	0.281392	0.335609	0.370906	0.341136	0.251377	0.346729	0.284992	0.284137	NaN	NaN	NaN
70.5666	-35.8976	0.421216	0.180743	0.392429	0.426238	0.157497	0.29896	0.304169	0.281392	0.335609	0.370906	0.336658	0.255511	0.344157	0.286883	0.282836	NaN	NaN	NaN
70.5679	-35.8798	0.421217	0.180743	0.392431	0.426239	0.157497	0.29896	0.304169	0.281392	0.335608	0.370905	0.329948	0.261705	0.336441	0.284856	0.282741	NaN	NaN	NaN
70.5689	-35.8667	0.421218	0.180743	0.392433	0.426241	0.157497	0.298961	0.304169	0.281392	0.335608	0.370905	0.329948	0.261705	0.331299	0.286713	0.284016	NaN	NaN	NaN
70.5702	-35.8493	0.421219	0.180744	0.392435	0.426242	0.157498	0.298961	0.304169	0.313788	0.311437	0.370904	0.329947	0.261704	0.326158	0.290495	0.281416	NaN	NaN	NaN
70.5715	-35.8318	0.421221	0.180744	0.392437	0.426243	0.157498	0.298961	0.304169	0.313788	0.311436	0.370904	0.32771	0.263769	0.31845	0.292315	0.280068	NaN	NaN	NaN
70.5725	-35.8187	0.421222	0.180745	0.392438	0.426245	0.157498	0.298962	0.304169	0.289484	0.32957	0.355905	0.327457	0.269958	0.318449	0.28654	0.283894	NaN	NaN	NaN
70.5738	-35.8012	0.421223	0.180745	0.386281	0.436781	0.157499	0.298962	0.304169	0.281392	0.335607	0.345917	0.329519	0.269903	0.320968	0.280767	0.287718	NaN	NaN	NaN
70.5751	-35.7837	0.421225	0.180745	0.361699	0.478832	0.157499	0.298962	0.297346	0.27319	0.347684	0.345916	0.329519	0.261443	0.331039	0.274995	0.286344	NaN	NaN	NaN
70.5761	-35.7706	0.421226	0.180746	0.361701	0.478833	0.157499	0.298963	0.276899	0.27287	0.347297	0.36056	0.329518	0.261443	0.331038	0.269225	0.288866	NaN	NaN	NaN
70.5773	-35.7531	0.421227	0.180746	0.361702	0.478835	0.1575	0.298963	0.270093	0.280835	0.334998	0.370308	0.329518	0.2551	0.338587	0.261534	0.293959	NaN	NaN	NaN
70.5787	-35.7356	0.421228	0.180746	0.361704	0.478836	0.1575	0.298963	0.270093	0.280835	0.334998	0.370308	0.329517	0.250874	0.343615	0.255767	0.297777	NaN	NaN	NaN
70.5796	-35.7225	0.42123	0.180747	0.361706	0.478838	0.157501	0.298964	0.270093	0.280835	0.334997	0.370308	0.329516	0.250874	0.343614	0.250002	0.301593	NaN	NaN	NaN
70.5809	-35.705	0.421231	0.180747	0.361707	0.478839	0.157501	0.298964	0.270093	0.280835	0.334997	0.370307	0.329516	0.250873	0.333342	0.255642	0.302864	NaN	NaN	NaN
70.5819	-35.6919	0.421232	0.180748	0.361709	0.478841	0.157501	0.298965	0.270093	0.280835	0.334997	0.370307	0.329515	0.250873	0.330775	0.257531	0.302863	NaN	NaN	NaN
70.5831	-35.6745	0.421233	0.180748	0.36171	0.478843	0.157502	0.298965	0.270093	0.280835	0.334997	0.370306	0.331748	0.24881	0.330774	0.25753	0.302862	NaN	NaN	NaN
70.5844	-35.657	0.421235	0.180748	0.361712	0.478844	0.157502	0.298965	0.270093	0.280835	0.334997	0.370306	0.340687	0.240553	0.330774	0.263293	0.299046	NaN	NaN	NaN
70.5854	-35.6439	0.421236	0.180749	0.361714	0.478846	0.157502	0.298966	0.270093	0.280835	0.334996	0.370306	0.340687	0.240552	0.330773	0.267136	0.2965	NaN	NaN	NaN
70.5867	-35.6265	0.421237	0.180749	0.361715	0.478847	0.157503	0.298966	0.270093	0.280835	0.334996	0.370305	0.340686	0.240552	0.330772	0.274823	0.291408	NaN	NaN	NaN
70.5879	-35.609	0.421238	0.180749	0.361717	0.478849	0.157503	0.298966	0.270094	0.280835	0.35345	0.355677	0.340686	0.242664	0.328257	0.282513	0.290209	NaN	NaN	NaN
70.5889	-35.5958	0.42124	0.18075	0.361719	0.47885	0.146888	0.313688	0.270094	0.280835	0.365768	0.345912	0.340685	0.249004	0.320708	0.286359	0.290258	NaN	NaN	NaN
70.5902	-35.5783	0.421241	0.18075	0.36172	0.435793	0.153643	0.323483	0.270094	0.280835	0.365768	0.345911	0.340685	0.251118	0.325892	0.280691	0.290258	NaN	NaN	NaN
70.5915	-35.5608	0.421242	0.180751	0.361722	0.425052	0.157091	0.313384	0.283478	0.280835	0.365768	0.335923	0.344979	0.251118	0.331028	0.27691	0.290257	NaN	NaN	NaN
70.5924	-35.5476	0.421243	0.180751	0.361724	0.425053	0.157091	0.298259	0.30352	0.280835	0.365768	0.320959	0.351412	0.251117	0.331027	0.27691	0.290257	NaN	NaN	NaN
70.5937	-35.5301	0.421245	0.180751	0.361725	0.425055	0.157091	0.29826	0.303521	0.280835	0.365767	0.320959	0.351412	0.251117	0.331027	0.276909	0.290256	NaN	NaN	NaN
70.5947	-35.5169	0.421246	0.180752	0.361727	0.425056	0.157092	0.29826	0.289905	0.288686	0.371795	0.320959	0.349175	0.253181	0.331026	0.276908	0.287657	NaN	NaN	NaN
70.5959	-35.4993	0.421247	0.180752	0.361729	0.425057	0.157092	0.298261	0.269514	0.280273	0.39587	0.320958	0.340239	0.255091	0.338574	0.269215	0.288856	NaN	NaN	NaN
70.5972	-35.4817	0.421249	0.180753	0.343321	0.456546	0.157093	0.298261	0.269514	0.280273	0.39587	0.320958	0.340239	0.250866	0.343602	0.267292	0.287532	NaN	NaN	NaN
70.5981	-35.4685	0.42125	0.180753	0.331076	0.477492	0.157093	0.298261	0.269514	0.280273	0.383552	0.330724	0.340238	0.24664	0.346062	0.267259	0.28491	NaN	NaN	NaN
70.5994	-35.4509	0.421251	0.180753	0.331078	0.477494	0.157093	0.298262	0.269514	0.256093	0.383138	0.345352	0.331308	0.248553	0.34333	0.267128	0.286107	NaN	NaN	NaN
70.6007	-35.4333	0.421252	0.180754	0.331079	0.477495	0.157094	0.298262	0.269514	0.239998	0.395144	0.345352	0.329077	0.244281	0.350864	0.261363	0.284734	NaN	NaN	NaN
70.6016	-35.4201	0.421254	0.180754	0.331081	0.477497	0.157094	0.298263	0.255926	0.255897	0.395144	0.335379	0.328903	0.244183	0.348185	0.261267	0.284658	NaN	NaN	NaN
70.6029	-35.4025	0.421255	0.18895	0.319255	0.477499	0.157094	0.298263	0.235576	0.279708	0.395143	0.320438	0.328642	0.244032	0.348018	0.255411	0.288395	NaN	NaN	NaN
70.6042	-35.385	0.421256	0.20128	0.301472	0.4775	0.157095	0.298263	0.235576	0.279708	0.370564	0.339925	0.324185	0.243933	0.342779	0.255283	0.288291	NaN	NaN	NaN
70.6051	-35.3718	0.421257	0.20128	0.301473	0.477502	0.157095	0.293223	0.242256	0.279708	0.364427	0.34479	0.317504	0.243781	0.345174	0.253301	0.288212	NaN	NaN	NaN
70.6064	-35.3537	0.421259	0.201281	0.301475	0.477503	0.157095	0.273094	0.26893	0.279708	0.364427	0.34479	0.317504	0.23957	0.3425	0.25704	0.286889	NaN	NaN	NaN
70.6074	-35.3405	0.42126	0.201281	0.301476	0.477505	0.157096	0.273094	0.26893	0.279708	0.364426	0.344789	0.315276	0.241626	0.337378	0.262727	0.281731	NaN	NaN	NaN
70.6086	-35.3229	0.421261	0.201281	0.301477	0.477506	0.157096	0.273095	0.26893	0.279708	0.364426	0.344789	0.315276	0.241625	0.329698	0.276051	0.276648	NaN	NaN	NaN
70.6099	-35.3053	0.421262	0.201282	0.301479	0.477508	0.157097	0.273095	0.26893	0.279708	0.364426	0.334832	0.326238	0.235457	0.32202	0.287454	0.271537	NaN	NaN	NaN
70.6109	-35.2921	0.421264	0.201282	0.30148	0.47751	0.157097	0.273095	0.268931	0.279708	0.364426	0.319913	0.341564	0.227226	0.316904	0.295055	0.265105	NaN	NaN	NaN
70.6121	-35.2745	0.421265	0.201283	0.301482	0.477511	0.157097	0.273096	0.268931	0.279708	0.364426	0.319913	0.350481	0.218986	0.316904	0.295054	0.263809	NaN	NaN	NaN
70.6133	-35.2569	0.421266	0.201283	0.301483	0.477513	0.157098	0.273096	0.268931	0.279708	0.364426	0.319913	0.34825	0.221046	0.316903	0.289297	0.267624	NaN	NaN	NaN
70.6142	-35.2436	0.421268	0.201283	0.301484	0.477514	0.157098	0.273096	0.268931	0.279708	0.364425	0.319912	0.341562	0.227224	0.316902	0.283543	0.271437	NaN	NaN	NaN
70.6155	-35.226	0.421269	0.201284	0.301486	0.477516	0.157098	0.273097	0.268931	0.279708	0.364425	0.319912	0.332651	0.235455	0.316901	0.275872	0.281701	NaN	NaN	NaN
70.6168	-35.2084	0.42127	0.201284	0.301487	0.477518	0.157099	0.273097	0.268931	0.279708	0.364425	0.314939	0.330338	0.239566	0.316901	0.275872	0.282996	NaN	NaN	NaN
70.6177	-35.1952	0.421271	0.201285	0.301488	0.477519	0.14651	0.272704	0.288911	0.279708	0.364425	0.300036	0.336746	0.239565	0.3169	0.275871	0.282995	NaN	NaN	NaN
70.619	-35.1775	0.421273	0.201285	0.30149	0.477521	0.139464	0.272442	0.302208	0.279708	0.364425	0.295072	0.347784	0.231339	0.316899	0.27587	0.282995	NaN	NaN	NaN
70.6202	-35.1599	0.421274	0.201285	0.301491	0.477522	0.139464	0.272442	0.302208	0.279708	0.364425	0.295072	0.350011	0.225069	0.32191	0.27587	0.282994	NaN	NaN	NaN
70.6211	-35.1466	0.421275	0.201286	0.301493	0.477524	0.139464	0.272442	0.302208	0.279708	0.364424	0.295072	0.347783	0.220816	0.329419	0.275869	0.282994	NaN	NaN	NaN
70.6223	-35.1289	0.421276	0.201286	0.301494	0.477526	0.139465	0.272443	0.302209	0.279708	0.352148	0.304805	0.338878	0.229042	0.329419	0.275868	0.282993	NaN	NaN	NaN
70.6233	-35.1157	0.421278	0.201287	0.301495	0.477527	0.13242	0.282213	0.302209	0.279708	0.333759	0.319383	0.338877	0.229042	0.329418	0.275868	0.282992	NaN	NaN	NaN
70.6246	-35.098	0.421279	0.201287	0.301497	0.477529	0.121873	0.296839	0.295427	0.287643	0.333759	0.319383	0.347781	0.220814	0.329417	0.275867	0.282992	NaN	NaN	NaN
70.6258	-35.0803	0.42128	0.201287	0.301498	0.47753	0.121874	0.296839	0.268343	0.319333	0.333759	0.299538	0.358539	0.218755	0.329416	0.275866	0.282991	NaN	NaN	NaN
70.6267	-35.0671	0.421282	0.201288	0.301499	0.477532	0.121874	0.29684	0.268344	0.319333	0.333759	0.294583	0.35844	0.220813	0.329416	0.275866	0.280399	NaN	NaN	NaN
70.6279	-35.0494	0.421283	0.201288	0.301501	0.477533	0.121874	0.29684	0.268344	0.319333	0.333759	0.294582	0.349537	0.22904	0.329415	0.275865	0.276512	NaN	NaN	NaN
70.6291	-35.0317	0.421284	0.201289	0.301502	0.456046	0.128772	0.296841	0.268344	0.319333	0.333759	0.294582	0.347311	0.231095	0.326856	0.277747	0.276511	NaN	NaN	NaN
70.6301	-35.0184	0.421285	0.201289	0.301504	0.423878	0.139096	0.291823	0.274994	0.319333	0.333758	0.294582	0.340639	0.233052	0.324192	0.281473	0.277781	NaN	NaN	NaN
70.6313	-35.0007	0.421287	0.201289	0.301505	0.42388	0.139097	0.271785	0.288014	0.335164	0.333758	0.294581	0.338416	0.2288	0.32914	0.275687	0.282859	NaN	NaN	NaN
70.6326	-34.9831	0.421288	0.20129	0.301506	0.423881	0.139097	0.271786	0.267751	0.358872	0.333758	0.294581	0.338416	0.228799	0.329139	0.275686	0.277677	NaN	NaN	NaN
70.6335	-34.9698	0.421289	0.20129	0.301508	0.423882	0.139097	0.271786	0.267751	0.358872	0.333758	0.294581	0.338415	0.228799	0.329138	0.275686	0.276382	NaN	NaN	NaN
70.6347	-34.9521	0.42129	0.201291	0.301509	0.423884	0.14261	0.266915	0.267751	0.358872	0.333758	0.294581	0.338415	0.226697	0.331638	0.275685	0.276381	NaN	NaN	NaN
70.6356	-34.9388	0.421292	0.201291	0.30151	0.423885	0.153166	0.252276	0.267752	0.358872	0.333758	0.29458	0.338414	0.220395	0.33147	0.281326	0.276381	NaN	NaN	NaN
70.6368	-34.9211	0.421293	0.201291	0.301512	0.423887	0.15669	0.24739	0.267752	0.358872	0.333758	0.29458	0.338414	0.218295	0.32886	0.285083	0.27638	NaN	NaN	NaN
70.6381	-34.9034	0.421294	0.201292	0.301513	0.423888	0.15669	0.24739	0.267752	0.358872	0.333757	0.29458	0.338413	0.218295	0.32886	0.281251	0.278918	NaN	NaN	NaN
70.639	-34.8901	0.421296	0.201292	0.301515	0.42389	0.15669	0.24739	0.267752	0.358872	0.333757	0.294579	0.338413	0.218294	0.328859	0.275505	0.282724	NaN	NaN	NaN
70.6402	-34.8724	0.421297	0.209523	0.289647	0.423891	0.156691	0.247391	0.267752	0.358872	0.333757	0.294579	0.338412	0.218294	0.318646	0.283019	0.282723	NaN	NaN	NaN
70.6414	-34.8548	0.421298	0.221905	0.271801	0.423892	0.146128	0.262041	0.267753	0.358872	0.333757	0.294579	0.338411	0.218293	0.316094	0.284896	0.282722	NaN	NaN	NaN
70.6424	-34.8415	0.421299	0.221905	0.271802	0.423894	0.1391	0.271789	0.267753	0.342781	0.345763	0.294579	0.338411	0.218293	0.316093	0.284895	0.282722	NaN	NaN	NaN
70.6436	-34.8235	0.421301	0.221906	0.271803	0.423895	0.1391	0.27179	0.267753	0.31868	0.363745	0.314413	0.329881	0.218292	0.310989	0.288649	0.287901	NaN	NaN	NaN
70.6448	-34.8058	0.421302	0.221906	0.271804	0.423897	0.128564	0.286402	0.267753	0.31868	0.35149	0.329092	0.327745	0.218292	0.303337	0.28662	0.294267	NaN	NaN	NaN
70.6457	-34.7925	0.421303	0.221906	0.271806	0.423898	0.121554	0.296124	0.267753	0.294597	0.351102	0.343644	0.327745	0.218292	0.303336	0.284706	0.295534	NaN	NaN	NaN
70.6469	-34.7747	0.421305	0.230172	0.259898	0.4239	0.121554	0.296125	0.267754	0.278565	0.363062	0.343644	0.325521	0.220345	0.303335	0.284706	0.295533	NaN	NaN	NaN
70.6481	-34.757	0.421306	0.242604	0.241992	0.423901	0.121554	0.296125	0.267754	0.278565	0.363062	0.353569	0.312363	0.228552	0.298234	0.288457	0.295533	NaN	NaN	NaN
70.6491	-34.7436	0.421307	0.242604	0.241993	0.423902	0.121555	0.296126	0.267754	0.278566	0.363062	0.368476	0.305948	0.228551	0.290587	0.294081	0.295532	NaN	NaN	NaN
70.6503	-34.7258	0.421308	0.242605	0.241994	0.423904	0.121555	0.296126	0.267754	0.278566	0.363062	0.368476	0.305947	0.234849	0.283088	0.29408	0.295531	NaN	NaN	NaN
70.6512	-34.7124	0.42131	0.242605	0.241995	0.423905	0.121555	0.296127	0.267754	0.278566	0.363062	0.368475	0.305947	0.239051	0.278084	0.294079	0.295531	NaN	NaN	NaN
70.6523	-34.6946	0.421311	0.242606	0.241996	0.423907	0.121555	0.296127	0.267755	0.278566	0.363062	0.368475	0.305946	0.23905	0.278083	0.294079	0.291646	NaN	NaN	NaN
70.6536	-34.6767	0.421312	0.242606	0.241997	0.423908	0.128567	0.286406	0.267755	0.278566	0.363062	0.368475	0.305946	0.236949	0.283133	0.292204	0.286467	NaN	NaN	NaN
70.6545	-34.6633	0.421314	0.242607	0.241998	0.42391	0.139104	0.271794	0.267755	0.278566	0.363061	0.353567	0.31236	0.230648	0.298281	0.286578	0.281289	NaN	NaN	NaN
70.6557	-34.6455	0.421315	0.242607	0.241999	0.391775	0.149417	0.271795	0.267755	0.270549	0.369042	0.338677	0.318766	0.228548	0.30333	0.282787	0.274793	NaN	NaN	NaN
70.6569	-34.6277	0.421316	0.242607	0.242	0.370397	0.145742	0.286407	0.267755	0.238529	0.380696	0.328542	0.327296	0.220153	0.31332	0.273222	0.270782	NaN	NaN	NaN
70.6578	-34.6143	0.421317	0.242608	0.242002	0.370398	0.138732	0.29613	0.267756	0.238529	0.362374	0.328205	0.333687	0.211764	0.323302	0.265572	0.268093	NaN	NaN	NaN
70.6589	-34.5965	0.421319	0.23846	0.247978	0.370399	0.138732	0.276124	0.294265	0.238529	0.344063	0.313045	0.335353	0.211539	0.330667	0.255947	0.261452	NaN	NaN	NaN
70.6601	-34.5788	0.42132	0.221912	0.271822	0.338353	0.145511	0.261017	0.320723	0.238529	0.319683	0.307683	0.323817	0.217353	0.325173	0.255636	0.258639	NaN	NaN	NaN
70.6611	-34.5655	0.421321	0.217781	0.265532	0.337977	0.141852	0.250674	0.346968	0.246432	0.295339	0.307258	0.310199	0.227314	0.314716	0.261041	0.257193	NaN	NaN	NaN
70.6623	-34.5478	0.421322	0.201301	0.27097	0.348011	0.131227	0.235161	0.365904	0.269876	0.276892	0.306726	0.292132	0.23916	0.299092	0.268183	0.255668	NaN	NaN	NaN
70.6631	-34.5345	0.421324	0.188971	0.270456	0.347416	0.13798	0.210302	0.378323	0.277415	0.276565	0.311322	0.278772	0.247054	0.288738	0.26978	0.255482	NaN	NaN	NaN
70.6643	-34.5167	0.421325	0.172585	0.26369	0.378201	0.141313	0.185525	0.357172	0.324133	0.282304	0.306189	0.26756	0.250758	0.278296	0.275091	0.256581	NaN	NaN	NaN
70.6654	-34.499	0.421326	0.160335	0.269249	0.367151	0.1376	0.194989	0.310086	0.346719	0.293736	0.31557	0.269594	0.246539	0.275613	0.27303	0.256444	NaN	NaN	NaN
70.6663	-34.4858	0.421328	0.160336	0.269251	0.335377	0.147797	0.199911	0.270258	0.385688	0.311894	0.315904	0.272024	0.238446	0.275612	0.273029	0.25773	NaN	NaN	NaN
70.6675	-34.4681	0.421329	0.164415	0.287659	0.272678	0.158057	0.224688	0.231045	0.465342	0.27063	0.316236	0.300847	0.214306	0.273288	0.276949	0.257866	NaN	NaN	NaN
70.6687	-34.4505	0.42133	0.184873	0.28858	0.220574	0.196431	0.211049	0.24527	0.515507	0.211393	0.316897	0.33229	0.194372	0.268722	0.27727	0.259369	NaN	NaN	NaN
70.6696	-34.4372	0.421331	0.201297	0.289316	0.210502	0.20027	0.22639	0.25277	0.509175	0.205845	0.312615	0.352709	0.182411	0.26911	0.271872	0.264657	NaN	NaN	NaN
70.6707	-34.4195	0.421333	0.221916	0.271834	0.242567	0.197304	0.21687	0.273163	0.477954	0.242522	0.308415	0.362187	0.161866	0.284337	0.262575	0.280155	NaN	NaN	NaN
70.6719	-34.4018	0.421334	0.234321	0.25396	0.327686	0.16648	0.181966	0.312416	0.477561	0.285121	0.313883	0.342748	0.134624	0.313923	0.25291	0.304398	NaN	NaN	NaN
70.6727	-34.3884	0.421335	0.242614	0.22977	0.39136	0.142241	0.166842	0.318251	0.476571	0.315148	0.318839	0.327286	0.128205	0.318465	0.245053	0.320816	NaN	NaN	NaN
70.6739	-34.3706	0.421337	0.238466	0.211308	0.433153	0.128227	0.161577	0.317504	0.451518	0.363066	0.318839	0.307319	0.1425	0.293038	0.235141	0.338282	NaN	NaN	NaN
70.6751	-34.3526	0.421338	0.221918	0.204688	0.463881	0.128094	0.171277	0.297462	0.426948	0.392777	0.308826	0.296	0.152629	0.275194	0.229107	0.341674	NaN	NaN	NaN
70.676	-34.3391	0.421339	0.221918	0.186453	0.452411	0.141784	0.171277	0.297462	0.40298	0.392328	0.303569	0.29346	0.152456	0.282502	0.221468	0.336304	NaN	NaN	NaN
70.6772	-34.3211	0.421341	0.209537	0.198238	0.39898	0.15178	0.185818	0.304139	0.38719	0.373869	0.298221	0.29084	0.150172	0.299777	0.210122	0.324511	NaN	NaN	NaN
70.6781	-34.3076	0.421342	0.201307	0.210112	0.367168	0.14456	0.209994	0.324195	0.363725	0.355584	0.297917	0.292798	0.145958	0.309633	0.206342	0.314159	NaN	NaN	NaN
70.6793	-34.2894	0.421343	0.188977	0.252209	0.325607	0.137605	0.219643	0.35768	0.324545	0.331234	0.297504	0.301282	0.143887	0.312095	0.210121	0.294968	NaN	NaN	NaN
70.6805	-34.2714	0.421344	0.180781	0.276218	0.304785	0.137605	0.219643	0.391236	0.285276	0.331234	0.29258	0.310016	0.141915	0.307169	0.225248	0.27469	NaN	NaN	NaN
70.6814	-34.2579	0.421346	0.180781	0.29451	0.273503	0.137606	0.219644	0.411403	0.285632	0.313359	0.29258	0.318845	0.142046	0.29983	0.240428	0.262126	NaN	NaN	NaN
70.6825	-34.24	0.421347	0.180782	0.300618	0.284259	0.137759	0.229755	0.405431	0.27799	0.301423	0.312288	0.321416	0.144283	0.297647	0.250088	0.253423	NaN	NaN	NaN
70.6837	-34.2222	0.421348	0.180782	0.30062	0.31613	0.148453	0.205687	0.398876	0.310008	0.277532	0.322152	0.328235	0.146525	0.297983	0.250312	0.256158	NaN	NaN	NaN
70.6846	-34.2088	0.42135	0.193085	0.282863	0.316131	0.155444	0.210842	0.359007	0.341663	0.283719	0.327313	0.328509	0.144543	0.305683	0.241002	0.26387	NaN	NaN	NaN
70.6857	-34.191	0.421351	0.20131	0.258787	0.337015	0.155445	0.22076	0.312266	0.380981	0.301999	0.317763	0.326384	0.144542	0.313276	0.229718	0.277925	NaN	NaN	NaN
70.6869	-34.1732	0.421352	0.213664	0.222695	0.336402	0.165671	0.220761	0.278734	0.396178	0.319933	0.317763	0.317526	0.148569	0.310628	0.222031	0.293142	NaN	NaN	NaN
70.6877	-34.1599	0.421353	0.221923	0.204699	0.325617	0.172475	0.220761	0.251961	0.403503	0.33784	0.317762	0.308676	0.150514	0.302865	0.223727	0.299411	NaN	NaN	NaN
70.6889	-34.1421	0.408372	0.238214	0.180395	0.335405	0.168702	0.225268	0.25162	0.395003	0.361679	0.307883	0.297457	0.158575	0.287542	0.227207	0.308178	NaN	NaN	NaN
70.6897	-34.1288	0.405139	0.242288	0.180396	0.314266	0.172	0.220207	0.264732	0.371067	0.373443	0.297914	0.294998	0.158428	0.282275	0.228891	0.310577	NaN	NaN	NaN
70.6909	-34.111	0.405142	0.242288	0.180397	0.272036	0.185551	0.20537	0.284388	0.339204	0.372867	0.307355	0.288219	0.162391	0.269513	0.232385	0.309084	NaN	NaN	NaN
70.692	-34.0932	0.405145	0.242288	0.180397	0.261502	0.188931	0.19056	0.283982	0.338776	0.390666	0.292578	0.292375	0.156136	0.271821	0.224721	0.30884	NaN	NaN	NaN
70.6929	-34.0799	0.405148	0.242289	0.180398	0.261503	0.185445	0.180608	0.290248	0.35437	0.378501	0.292375	0.296612	0.154065	0.274284	0.217171	0.307415	NaN	NaN	NaN
70.694	-34.062	0.405151	0.242289	0.204705	0.241016	0.16476	0.195	0.296769	0.35437	0.360279	0.29207	0.302959	0.147853	0.281672	0.209623	0.304709	NaN	NaN	NaN
70.6952	-34.0442	0.405154	0.24229	0.210796	0.26229	0.154592	0.190075	0.303294	0.38619	0.336537	0.29207	0.300756	0.145751	0.286593	0.205851	0.300791	NaN	NaN	NaN
70.696	-34.0308	0.405156	0.24229	0.210797	0.294016	0.144413	0.190075	0.303294	0.394157	0.330592	0.29207	0.294152	0.151852	0.294144	0.202176	0.29698	NaN	NaN	NaN
70.6971	-34.0129	0.41163	0.234145	0.210798	0.325809	0.134211	0.195001	0.29677	0.42604	0.306799	0.301903	0.289921	0.151851	0.309258	0.209917	0.28578	NaN	NaN	NaN
70.6983	-33.995	0.421366	0.221927	0.210799	0.368286	0.127537	0.209996	0.277452	0.434396	0.288927	0.31667	0.305591	0.141848	0.327223	0.223553	0.268417	NaN	NaN	NaN
70.6991	-33.9816	0.421368	0.209546	0.228653	0.368287	0.148454	0.20075	0.304705	0.395864	0.289254	0.312071	0.332276	0.123626	0.342707	0.22961	0.255984	NaN	NaN	NaN
70.7002	-33.9637	0.421369	0.201315	0.240528	0.410849	0.169816	0.176932	0.305426	0.388664	0.277531	0.317217	0.348069	0.119743	0.353357	0.226213	0.252405	NaN	NaN	NaN
70.7014	-33.9458	0.42137	0.201316	0.240529	0.421512	0.169907	0.177022	0.298854	0.39668	0.271549	0.336954	0.324068	0.119558	0.375688	0.214882	0.265147	NaN	NaN	NaN
70.7023	-33.9324	0.421372	0.197201	0.246468	0.421514	0.159379	0.181708	0.311994	0.39668	0.271548	0.341894	0.306458	0.125578	0.377938	0.201509	0.284132	NaN	NaN	NaN
70.7034	-33.9144	0.421373	0.180789	0.270161	0.421515	0.141867	0.186199	0.298019	0.419684	0.289484	0.341894	0.304248	0.117265	0.367459	0.195561	0.306883	NaN	NaN	NaN
70.7042	-33.901	0.421374	0.18079	0.270162	0.421517	0.138372	0.176221	0.290935	0.434953	0.301422	0.341894	0.304247	0.113126	0.357206	0.195384	0.318245	NaN	NaN	NaN
70.7053	-33.8831	0.421375	0.18079	0.270163	0.421518	0.138373	0.171287	0.297472	0.434953	0.289254	0.351538	0.304247	0.113126	0.3471	0.193375	0.328349	NaN	NaN	NaN
70.7065	-33.8652	0.421377	0.18079	0.270165	0.42152	0.138373	0.171287	0.297473	0.402986	0.294886	0.365983	0.297616	0.117184	0.339459	0.197035	0.330845	NaN	NaN	NaN
70.7073	-33.8517	0.421378	0.180791	0.270166	0.421522	0.138374	0.171287	0.297473	0.395006	0.300841	0.356105	0.297451	0.115061	0.346831	0.195145	0.332093	NaN	NaN	NaN
70.7085	-33.8338	0.421379	0.180791	0.270167	0.421523	0.138374	0.171288	0.297473	0.395006	0.300841	0.341306	0.312652	0.104828	0.349286	0.187588	0.331944	NaN	NaN	NaN
70.7096	-33.8159	0.421381	0.180791	0.270168	0.442847	0.131531	0.151559	0.323606	0.363102	0.324649	0.326516	0.330066	0.100811	0.341916	0.178146	0.333041	NaN	NaN	NaN
70.7104	-33.8025	0.421382	0.180792	0.27017	0.474898	0.110762	0.146412	0.343006	0.362953	0.330591	0.316667	0.334301	0.104949	0.331948	0.172431	0.334135	NaN	NaN	NaN
70.7115	-33.7846	0.414898	0.18889	0.270171	0.4749	0.103786	0.146262	0.329349	0.39416	0.330591	0.296982	0.329506	0.106869	0.336671	0.168579	0.330093	NaN	NaN	NaN
70.7126	-33.7667	0.405203	0.201037	0.270172	0.46421	0.0967619	0.180432	0.3033	0.394161	0.324517	0.291965	0.320492	0.104655	0.351327	0.166668	0.319756	NaN	NaN	NaN
70.7135	-33.7532	0.405206	0.201038	0.270174	0.432188	0.100083	0.204856	0.283729	0.394161	0.306316	0.291658	0.320216	0.0983957	0.358467	0.164705	0.313199	NaN	NaN	NaN
70.7146	-33.7353	0.405208	0.201038	0.270175	0.421532	0.103504	0.229531	0.25104	0.378231	0.312143	0.291555	0.313515	0.102421	0.355804	0.157098	0.307818	NaN	NaN	NaN
70.7154	-33.7219	0.405211	0.201038	0.270176	0.421534	0.103504	0.244367	0.231383	0.354374	0.311767	0.291247	0.315443	0.106492	0.34825	0.153261	0.302515	NaN	NaN	NaN
70.7166	-33.704	0.411673	0.192941	0.270177	0.421535	0.103505	0.244368	0.218057	0.369965	0.299666	0.29104	0.313059	0.112592	0.340698	0.155067	0.293491	NaN	NaN	NaN
70.7177	-33.6862	0.421391	0.180794	0.270179	0.421537	0.103505	0.229532	0.217759	0.393309	0.299666	0.29104	0.313059	0.112592	0.335666	0.160654	0.28458	NaN	NaN	NaN
70.7185	-33.6727	0.421392	0.180795	0.27018	0.421538	0.103505	0.21966	0.230841	0.393309	0.299665	0.29104	0.313058	0.112592	0.335666	0.168174	0.278329	NaN	NaN	NaN
70.7196	-33.6548	0.421394	0.168516	0.287918	0.42154	0.103505	0.21966	0.24414	0.377752	0.311767	0.281446	0.313058	0.116711	0.3358	0.175757	0.275973	NaN	NaN	NaN
70.7207	-33.6369	0.421395	0.160354	0.299715	0.421541	0.113946	0.205181	0.270785	0.354529	0.324014	0.281738	0.317733	0.118915	0.333681	0.17778	0.28129	NaN	NaN	NaN
70.7216	-33.6234	0.421396	0.160354	0.299716	0.421543	0.12092	0.195509	0.290798	0.354988	0.306201	0.291554	0.326729	0.117018	0.334009	0.17792	0.284017	NaN	NaN	NaN
70.7227	-33.6053	0.421397	0.160355	0.299718	0.421545	0.12092	0.195509	0.317522	0.37155	0.294772	0.287048	0.340257	0.111054	0.34197	0.172507	0.291904	NaN	NaN	NaN
70.7238	-33.5872	0.421399	0.160355	0.299719	0.421546	0.131388	0.180991	0.330906	0.403845	0.265059	0.292064	0.347083	0.11118	0.347353	0.168914	0.298485	NaN	NaN	NaN
70.7246	-33.5736	0.4214	0.160355	0.299721	0.421548	0.13838	0.171293	0.330907	0.427861	0.247134	0.301897	0.342856	0.113252	0.357532	0.169043	0.298655	NaN	NaN	NaN
70.7257	-33.5555	0.421401	0.160356	0.299722	0.421549	0.13838	0.18611	0.311281	0.435877	0.241151	0.316664	0.336506	0.113251	0.362591	0.174765	0.294972	NaN	NaN	NaN
70.7265	-33.5419	0.421403	0.160356	0.299724	0.421551	0.138381	0.196006	0.278102	0.459356	0.235076	0.321479	0.336505	0.113251	0.36259	0.178547	0.291186	NaN	NaN	NaN
70.7277	-33.5237	0.421404	0.160356	0.28755	0.442374	0.138381	0.196006	0.264744	0.474982	0.21081	0.34071	0.32766	0.117287	0.362452	0.176602	0.287238	NaN	NaN	NaN
70.7287	-33.5055	0.421405	0.160357	0.26933	0.473537	0.138381	0.196006	0.264744	0.474982	0.192628	0.355119	0.321032	0.111001	0.362035	0.168885	0.286909	NaN	NaN	NaN
70.7295	-33.4918	0.421407	0.160357	0.269331	0.473539	0.138382	0.186111	0.277854	0.458958	0.192487	0.349945	0.318553	0.108831	0.364208	0.157462	0.287854	NaN	NaN	NaN
70.7307	-33.4736	0.421408	0.160358	0.269333	0.473541	0.124409	0.185739	0.304022	0.426958	0.192183	0.354367	0.31387	0.102514	0.368682	0.149782	0.284952	NaN	NaN	NaN
70.7318	-33.4553	0.421409	0.160358	0.269334	0.473542	0.117435	0.175699	0.323457	0.394842	0.203871	0.349086	0.309104	0.10031	0.370687	0.151521	0.275832	NaN	NaN	NaN
70.7326	-33.4417	0.421411	0.156278	0.287377	0.442116	0.110409	0.190192	0.303445	0.394335	0.203633	0.353609	0.302329	0.100189	0.372832	0.147662	0.273075	NaN	NaN	NaN
70.7337	-33.4234	0.421412	0.140003	0.329168	0.368334	0.113637	0.184982	0.309528	0.377916	0.233341	0.338908	0.29767	0.106232	0.367648	0.134421	0.276526	NaN	NaN	NaN
70.7348	-33.4051	0.421413	0.140004	0.304842	0.367464	0.116858	0.179785	0.308942	0.369319	0.262986	0.338908	0.286698	0.116371	0.360102	0.130604	0.277626	NaN	NaN	NaN
70.7356	-33.3914	0.421414	0.140004	0.280577	0.398372	0.12026	0.155291	0.321466	0.368832	0.280744	0.324215	0.286445	0.122447	0.357586	0.132458	0.277625	NaN	NaN	NaN
70.7367	-33.3732	0.421416	0.140004	0.244293	0.460427	0.12026	0.140625	0.334261	0.352833	0.322598	0.314883	0.28223	0.122447	0.347532	0.13987	0.284001	NaN	NaN	NaN
70.7378	-33.3549	0.421417	0.140005	0.244294	0.460429	0.127199	0.140776	0.327944	0.345074	0.358851	0.29594	0.284589	0.118425	0.335041	0.149152	0.294245	NaN	NaN	NaN
70.7386	-33.3412	0.421418	0.140005	0.268467	0.429691	0.137704	0.155766	0.309103	0.329829	0.377313	0.286646	0.291425	0.114483	0.325265	0.156656	0.2995	NaN	NaN	NaN
70.7397	-33.323	0.42142	0.140005	0.310924	0.410191	0.138084	0.200541	0.284405	0.331255	0.360572	0.282426	0.300737	0.114756	0.318373	0.166232	0.299942	NaN	NaN	NaN
70.7405	-33.3094	0.421421	0.140006	0.32918	0.421558	0.134893	0.225627	0.285459	0.388276	0.301703	0.277994	0.3099	0.119106	0.324038	0.168436	0.29273	NaN	NaN	NaN
70.7416	-33.2912	0.421422	0.144068	0.323306	0.485638	0.117825	0.245612	0.292825	0.485809	0.212027	0.288135	0.314758	0.12344	0.354913	0.167099	0.275466	NaN	NaN	NaN
70.7427	-33.2729	0.421424	0.160362	0.299747	0.528477	0.104076	0.230704	0.3193	0.550617	0.157769	0.293068	0.312636	0.117228	0.418	0.163855	0.249149	NaN	NaN	NaN
70.7435	-33.2592	0.421425	0.160362	0.299748	0.528479	0.104076	0.20591	0.331987	0.566108	0.157709	0.292968	0.308131	0.102678	0.462829	0.145094	0.243964	NaN	NaN	NaN
70.7445	-33.2408	0.421426	0.160362	0.29975	0.485643	0.103852	0.215394	0.318267	0.540974	0.17555	0.287641	0.305488	0.0963529	0.489919	0.128095	0.236085	NaN	NaN	NaN
70.7456	-33.2224	0.421427	0.160363	0.281496	0.506177	0.103796	0.22023	0.298179	0.492043	0.205299	0.282329	0.305052	0.108596	0.464653	0.13927	0.219374	NaN	NaN	NaN
70.7464	-33.2086	0.421429	0.160363	0.269354	0.516252	0.0967709	0.234733	0.29818	0.459929	0.2232	0.272405	0.304786	0.118825	0.436963	0.146642	0.211579	NaN	NaN	NaN
70.7475	-33.1902	0.42143	0.160363	0.269355	0.47357	0.103514	0.244383	0.29818	0.43588	0.229003	0.277127	0.302498	0.12289	0.40661	0.150149	0.213877	NaN	NaN	NaN
70.7486	-33.1719	0.421431	0.160364	0.269357	0.473572	0.103514	0.244383	0.29818	0.435881	0.210809	0.291549	0.293704	0.120711	0.401166	0.149987	0.214967	NaN	NaN	NaN
70.7495	-33.1581	0.421433	0.160364	0.269358	0.473574	0.103514	0.244384	0.298181	0.435881	0.210809	0.291548	0.291507	0.114507	0.408419	0.149963	0.21494	NaN	NaN	NaN
70.7506	-33.1398	0.421434	0.160365	0.269359	0.473576	0.103514	0.244384	0.271428	0.443146	0.253012	0.272313	0.284917	0.108256	0.423067	0.149963	0.21494	NaN	NaN	NaN
70.7517	-33.1263	0.411752	0.172476	0.269361	0.452259	0.110357	0.244385	0.251394	0.450585	0.271025	0.267497	0.280528	0.104095	0.432817	0.146192	0.217436	NaN	NaN	NaN
70.7536	-33.1086	0.405319	0.18055	0.269362	0.42035	0.120599	0.244385	0.231394	0.442015	0.294883	0.25768	0.284752	0.0979369	0.440124	0.140539	0.221178	NaN	NaN	NaN
70.756	-33.0916	0.405321	0.18055	0.269363	0.420352	0.124077	0.219787	0.257595	0.434036	0.300838	0.242975	0.297662	0.0856991	0.447423	0.134888	0.224919	NaN	NaN	NaN
70.7583	-33.0794	0.405324	0.180551	0.269365	0.420354	0.134526	0.20036	0.264134	0.434036	0.300838	0.242974	0.306447	0.079627	0.444989	0.131122	0.227411	NaN	NaN	NaN
70.7618	-33.0642	0.405327	0.180551	0.269366	0.420355	0.138014	0.190584	0.270676	0.434036	0.300838	0.242974	0.31964	0.0756368	0.435249	0.134887	0.224918	NaN	NaN	NaN
70.7658	-33.0503	0.40533	0.180552	0.269367	0.420357	0.138015	0.170869	0.296793	0.434036	0.300838	0.242974	0.330647	0.0757264	0.423062	0.144306	0.218681	NaN	NaN	NaN
70.7692	-33.0407	0.405333	0.180552	0.269369	0.420358	0.138015	0.17087	0.296793	0.434037	0.282625	0.257414	0.335053	0.0819329	0.410856	0.15373	0.212439	NaN	NaN	NaN
70.7741	-33.0295	0.405336	0.180552	0.26937	0.42036	0.138016	0.17087	0.296793	0.434037	0.270501	0.267026	0.324039	0.104474	0.396186	0.157502	0.20994	NaN	NaN	NaN
70.7794	-33.0202	0.405339	0.180553	0.269371	0.420361	0.127559	0.185375	0.316793	0.426605	0.258586	0.281731	0.289134	0.116477	0.413301	0.144304	0.216131	NaN	NaN	NaN
70.7836	-33.0144	0.405342	0.180553	0.269372	0.420363	0.113646	0.204674	0.330148	0.434963	0.240686	0.291546	0.26079	0.103855	0.454726	0.129237	0.222284	NaN	NaN	NaN
70.7893	-33.0075	0.405345	0.180553	0.269374	0.420365	0.103233	0.219117	0.330149	0.434964	0.240686	0.291546	0.241106	0.0934108	0.48867	0.123591	0.22602	NaN	NaN	NaN
66.7897	-44.2185	0.386111	0.317614	NaN	NaN	NaN	NaN	0.383996	0.290607	NaN	NaN	NaN	NaN	NaN	NaN	NaN	NaN	NaN	NaN
66.7913	-44.218	0.382626	0.325963	NaN	NaN	NaN	NaN	0.377098	0.290612	NaN	NaN	NaN	NaN	NaN	NaN	NaN	NaN	NaN	NaN
66.7946	-44.2171	0.375675	0.342687	0.526865	0.46157	0.191435	0.350052	0.363283	0.290618	NaN	NaN	NaN	NaN	NaN	NaN	NaN	NaN	NaN	NaN
66.7962	-44.2166	0.372213	0.346828	0.520521	0.461343	0.195001	0.355279	0.356371	0.290624	NaN	NaN	NaN	NaN	NaN	NaN	NaN	NaN	NaN	NaN
66.7995	-44.2156	0.372215	0.34683	0.50784	0.471966	0.198565	0.365731	0.342536	0.290629	NaN	NaN	NaN	NaN	NaN	NaN	NaN	NaN	NaN	NaN
66.8027	-44.2147	0.372217	0.346832	0.49518	0.493647	0.198568	0.376189	0.32869	0.290635	NaN	NaN	NaN	NaN	NaN	NaN	NaN	NaN	NaN	NaN
66.8044	-44.2142	0.375681	0.346923	0.489153	0.493655	0.198571	0.381427	0.321764	0.290641	NaN	NaN	NaN	NaN	NaN	NaN	NaN	NaN	NaN	NaN
66.8076	-44.2131	0.382632	0.347103	0.477075	0.493663	0.198575	0.397133	0.300961	0.290646	NaN	NaN	NaN	NaN	NaN	NaN	NaN	NaN	NaN	NaN
66.8093	-44.2126	0.386117	0.347193	0.47103	0.493671	0.198578	0.402377	0.294024	0.290652	NaN	NaN	NaN	NaN	NaN	NaN	NaN	NaN	NaN	NaN
66.8125	-44.2117	0.392755	0.343146	0.464979	0.493678	0.198582	0.41811	0.273183	0.290657	NaN	NaN	NaN	NaN	NaN	NaN	NaN	NaN	NaN	NaN
66.8158	-44.2107	0.399189	0.334872	0.464985	0.493686	0.198585	0.428608	0.259279	0.290663	NaN	NaN	NaN	NaN	NaN	NaN	NaN	NaN	NaN	NaN
66.8174	-44.2103	0.402411	0.330736	0.464991	0.493694	0.198588	0.433866	0.252323	0.290669	NaN	NaN	NaN	NaN	NaN	NaN	NaN	NaN	NaN	NaN
66.8207	-44.2094	0.405638	0.326601	0.464997	0.493701	0.198592	0.439128	0.245363	0.290674	NaN	NaN	NaN	NaN	NaN	NaN	NaN	NaN	NaN	NaN
66.8223	-44.2089	0.405639	0.326603	0.465003	0.493709	0.198595	0.433882	0.252333	0.29068	NaN	NaN	NaN	NaN	NaN	NaN	NaN	NaN	NaN	NaN
66.8256	-44.208	0.405639	0.326605	0.46501	0.493717	0.198599	0.402393	0.294096	0.290685	NaN	NaN	NaN	NaN	NaN	NaN	NaN	NaN	NaN	NaN
66.8272	-44.2075	0.402414	0.330745	0.465016	0.493724	0.198602	0.376212	0.328814	0.290691	NaN	NaN	NaN	NaN	NaN	NaN	NaN	NaN	NaN	NaN
66.8305	-44.2065	0.395974	0.339023	0.465022	0.493732	0.198605	0.31883	0.404868	0.290697	NaN	NaN	NaN	NaN	NaN	NaN	NaN	NaN	NaN	NaN
66.8338	-44.2055	0.389487	0.343064	0.471085	0.49374	0.198609	0.277261	0.45995	0.290702	NaN	NaN	NaN	NaN	NaN	NaN	NaN	NaN	NaN	NaN
66.8354	-44.205	0.386125	0.34298	0.477143	0.493748	0.198612	0.266891	0.4737	0.290708	NaN	NaN	NaN	NaN	NaN	NaN	NaN	NaN	NaN	NaN
66.8386	-44.204	0.37917	0.34281	0.489235	0.493755	0.198615	0.266895	0.473709	0.290713	NaN	NaN	NaN	NaN	NaN	NaN	NaN	NaN	NaN	NaN
66.8403	-44.2035	0.375705	0.342725	0.495275	0.493763	0.198619	0.272089	0.466845	0.290719	NaN	NaN	NaN	NaN	NaN	NaN	NaN	NaN	NaN	NaN
66.8435	-44.2025	0.372248	0.346867	0.495282	0.493771	0.198622	0.287675	0.446217	0.290725	NaN	NaN	NaN	NaN	NaN	NaN	NaN	NaN	NaN	NaN
66.8468	-44.2015	0.37225	0.346869	0.495288	0.493778	0.198626	0.298076	0.432455	0.29073	NaN	NaN	NaN	NaN	NaN	NaN	NaN	NaN	NaN	NaN
66.8485	-44.2011	0.372252	0.342638	0.501332	0.493786	0.198629	0.303285	0.425571	0.290736	NaN	NaN	NaN	NaN	NaN	NaN	NaN	NaN	NaN	NaN
66.8517	-44.2002	0.379176	0.325925	0.513396	0.504892	0.195071	0.308496	0.418682	0.290741	NaN	NaN	NaN	NaN	NaN	NaN	NaN	NaN	NaN	NaN
66.8534	-44.1997	0.382651	0.317583	0.519423	0.516006	0.191511	0.308502	0.41869	0.290747	NaN	NaN	NaN	NaN	NaN	NaN	NaN	NaN	NaN	NaN
66.8566	-44.1988	0.389493	0.305124	0.525443	0.538252	0.184378	0.308507	0.418698	0.290753	NaN	NaN	NaN	NaN	NaN	NaN	NaN	NaN	NaN	NaN
66.8599	-44.1979	0.389493	0.305126	0.52545	0.549393	0.180808	0.313717	0.411812	0.290758	NaN	NaN	NaN	NaN	NaN	NaN	NaN	NaN	NaN	NaN
66.8615	-44.1974	0.389494	0.305128	0.525457	0.549401	0.180811	0.318929	0.404922	0.290764	NaN	NaN	NaN	NaN	NaN	NaN	NaN	NaN	NaN	NaN
66.8648	-44.1964	0.389494	0.30513	0.525463	0.54941	0.180814	0.329358	0.391119	0.290769	NaN	NaN	NaN	NaN	NaN	NaN	NaN	NaN	NaN	NaN
66.8665	-44.1959	0.389495	0.305132	0.52547	0.549419	0.180818	0.334581	0.384215	0.290775	NaN	NaN	NaN	NaN	NaN	NaN	NaN	NaN	NaN	NaN
66.8697	-44.1948	0.389496	0.305133	0.525477	0.549427	0.180821	0.334587	0.384222	0.290781	NaN	NaN	NaN	NaN	NaN	NaN	NaN	NaN	NaN	NaN
66.8714	-44.1943	0.389496	0.305135	0.525483	0.549436	0.180824	0.334593	0.38423	0.290786	NaN	NaN	NaN	NaN	NaN	NaN	NaN	NaN	NaN	NaN
66.8746	-44.1933	0.389497	0.305137	0.52549	0.549444	0.180827	0.339813	0.377328	0.290792	NaN	NaN	NaN	NaN	NaN	NaN	NaN	NaN	NaN	NaN
66.8779	-44.1923	0.389497	0.313548	0.513461	0.549453	0.18083	0.350257	0.363504	0.290797	NaN	NaN	NaN	NaN	NaN	NaN	NaN	NaN	NaN	NaN
66.8795	-44.1919	0.389498	0.317761	0.507441	0.549462	0.180833	0.355488	0.356589	0.290803	NaN	NaN	NaN	NaN	NaN	NaN	NaN	NaN	NaN	NaN
66.8828	-44.1909	0.389499	0.33042	0.489342	0.54947	0.180836	0.360721	0.356723	0.282553	NaN	NaN	NaN	NaN	NaN	NaN	NaN	NaN	NaN	NaN
66.8845	-44.1905	0.386139	0.338791	0.483307	0.549479	0.180839	0.365952	0.356865	0.274298	NaN	NaN	NaN	NaN	NaN	NaN	NaN	NaN	NaN	NaN
66.8877	-44.1896	0.379195	0.355559	0.471213	0.549487	0.180842	0.376417	0.357141	0.257768	NaN	NaN	NaN	NaN	NaN	NaN	NaN	NaN	NaN	NaN
66.891	-44.1887	0.372283	0.372359	0.459105	0.549496	0.180845	0.386894	0.350341	0.249499	NaN	NaN	NaN	NaN	NaN	NaN	NaN	NaN	NaN	NaN
66.8927	-44.1882	0.372285	0.376615	0.453049	0.549505	0.180849	0.386902	0.350348	0.249503	NaN	NaN	NaN	NaN	NaN	NaN	NaN	NaN	NaN	NaN
66.8959	-44.1872	0.372287	0.385138	0.440915	0.549513	0.180852	0.386909	0.350354	0.249508	NaN	NaN	NaN	NaN	NaN	NaN	NaN	NaN	NaN	NaN
66.8976	-44.1867	0.372289	0.389407	0.434841	0.549522	0.180855	0.386916	0.350361	0.249513	NaN	NaN	NaN	NaN	NaN	NaN	NaN	NaN	NaN	NaN
66.9009	-44.1857	0.372291	0.38941	0.434847	0.538396	0.184431	0.386923	0.350368	0.249518	NaN	NaN	NaN	NaN	NaN	NaN	NaN	NaN	NaN	NaN
66.9025	-44.1852	0.372293	0.389413	0.434853	0.527277	0.188005	0.38693	0.350374	0.249523	NaN	NaN	NaN	NaN	NaN	NaN	NaN	NaN	NaN	NaN
66.9058	-44.1842	0.372295	0.389415	0.434858	0.505057	0.195141	0.386937	0.350381	0.249527	NaN	NaN	NaN	NaN	NaN	NaN	NaN	NaN	NaN	NaN
66.909	-44.1832	0.372297	0.389418	0.434864	0.493963	0.198707	0.386944	0.350388	0.249532	NaN	NaN	NaN	NaN	NaN	NaN	NaN	NaN	NaN	NaN
66.9107	-44.1827	0.372299	0.385153	0.440949	0.493971	0.19871	0.386951	0.350394	0.249537	NaN	NaN	NaN	NaN	NaN	NaN	NaN	NaN	NaN	NaN
66.914	-44.1817	0.372301	0.376634	0.453096	0.493979	0.198714	0.386958	0.350401	0.249542	NaN	NaN	NaN	NaN	NaN	NaN	NaN	NaN	NaN	NaN
66.9156	-44.1812	0.372303	0.372383	0.459164	0.493986	0.198717	0.386965	0.350408	0.249547	NaN	NaN	NaN	NaN	NaN	NaN	NaN	NaN	NaN	NaN
66.9189	-44.1803	0.372305	0.368136	0.465227	0.493994	0.198721	0.386972	0.350414	0.249551	NaN	NaN	NaN	NaN	NaN	NaN	NaN	NaN	NaN	NaN
66.9222	-44.1794	0.372307	0.368139	0.465233	0.494002	0.191406	0.397126	0.350421	0.249556	NaN	NaN	NaN	NaN	NaN	NaN	NaN	NaN	NaN	NaN
66.9238	-44.1789	0.372309	0.368141	0.465239	0.494009	0.187754	0.4022	0.350428	0.249561	NaN	NaN	NaN	NaN	NaN	NaN	NaN	NaN	NaN	NaN
66.9271	-44.178	0.372311	0.368144	0.465245	0.494017	0.180454	0.412332	0.350434	0.249566	NaN	NaN	NaN	NaN	NaN	NaN	NaN	NaN	NaN	NaN
66.9287	-44.1775	0.372313	0.363895	0.471311	0.494025	0.180457	0.41234	0.350441	0.249571	NaN	NaN	NaN	NaN	NaN	NaN	NaN	NaN	NaN	NaN
66.932	-44.1765	0.372315	0.355409	0.483419	0.494032	0.18046	0.412347	0.350448	0.249575	NaN	NaN	NaN	NaN	NaN	NaN	NaN	NaN	NaN	NaN
66.9336	-44.176	0.372317	0.351174	0.483128	0.504887	0.180463	0.407117	0.357397	0.24958	NaN	NaN	NaN	NaN	NaN	NaN	NaN	NaN	NaN	NaN
66.9369	-44.175	0.372319	0.346944	0.476508	0.52656	0.180466	0.396657	0.364205	0.257863	NaN	NaN	NaN	NaN	NaN	NaN	NaN	NaN	NaN	NaN
66.9401	-44.174	0.372321	0.346946	0.463871	0.548197	0.18047	0.38621	0.363934	0.274409	NaN	NaN	NaN	NaN	NaN	NaN	NaN	NaN	NaN	NaN
66.9418	-44.1735	0.372323	0.346948	0.463877	0.548206	0.180473	0.386217	0.356879	0.282678	NaN	NaN	NaN	NaN	NaN	NaN	NaN	NaN	NaN	NaN
66.945	-44.1725	0.372325	0.346951	0.463883	0.548214	0.180476	0.380995	0.356758	0.290943	NaN	NaN	NaN	NaN	NaN	NaN	NaN	NaN	NaN	NaN
66.9466	-44.172	0.372327	0.346953	0.463889	0.548223	0.180479	0.375776	0.36369	0.290949	NaN	NaN	NaN	NaN	NaN	NaN	NaN	NaN	NaN	NaN
66.95	-44.171	0.372329	0.346955	0.463895	0.548231	0.180482	0.365341	0.377536	0.290954	NaN	NaN	NaN	NaN	NaN	NaN	NaN	NaN	NaN	NaN
66.9533	-44.1701	0.372331	0.346957	0.463901	0.54824	0.187789	0.350003	0.377395	0.299223	NaN	NaN	NaN	NaN	NaN	NaN	NaN	NaN	NaN	NaN
66.9549	-44.1697	0.372333	0.346959	0.470226	0.537437	0.191449	0.33972	0.377261	0.307488	NaN	NaN	NaN	NaN	NaN	NaN	NaN	NaN	NaN	NaN
66.9581	-44.1687	0.372335	0.346961	0.482886	0.515796	0.198772	0.319145	0.376985	0.323998	NaN	NaN	NaN	NaN	NaN	NaN	NaN	NaN	NaN	NaN
66.9598	-44.1683	0.372337	0.346963	0.489227	0.504965	0.198775	0.31394	0.376851	0.332249	NaN	NaN	NaN	NaN	NaN	NaN	NaN	NaN	NaN	NaN
66.963	-44.1673	0.372339	0.346966	0.495574	0.494125	0.198778	0.308738	0.383757	0.332255	NaN	NaN	NaN	NaN	NaN	NaN	NaN	NaN	NaN	NaN
66.9663	-44.1663	0.372341	0.346968	0.49558	0.494132	0.198782	0.308744	0.376715	0.340511	NaN	NaN	NaN	NaN	NaN	NaN	NaN	NaN	NaN	NaN
66.9679	-44.1658	0.372343	0.34697	0.495586	0.49414	0.198785	0.308749	0.369677	0.348762	NaN	NaN	NaN	NaN	NaN	NaN	NaN	NaN	NaN	NaN
66.9711	-44.1648	0.372345	0.346972	0.482917	0.515836	0.198788	0.308755	0.355605	0.365243	NaN	NaN	NaN	NaN	NaN	NaN	NaN	NaN	NaN	NaN
66.9727	-44.1643	0.372347	0.346974	0.476593	0.526674	0.198792	0.308761	0.348578	0.373481	NaN	NaN	NaN	NaN	NaN	NaN	NaN	NaN	NaN	NaN
66.976	-44.1633	0.372348	0.346976	0.463954	0.559422	0.195231	0.308766	0.348585	0.373488	NaN	NaN	NaN	NaN	NaN	NaN	NaN	NaN	NaN	NaN
66.9776	-44.1628	0.37235	0.351212	0.457921	0.570545	0.191668	0.308772	0.348591	0.373495	NaN	NaN	NaN	NaN	NaN	NaN	NaN	NaN	NaN	NaN
66.9809	-44.1619	0.372352	0.359694	0.445833	0.592808	0.184529	0.308777	0.348598	0.373502	NaN	NaN	NaN	NaN	NaN	NaN	NaN	NaN	NaN	NaN
66.9841	-44.161	0.372354	0.368196	0.440042	0.593145	0.180957	0.308783	0.348604	0.373509	NaN	NaN	NaN	NaN	NaN	NaN	NaN	NaN	NaN	NaN
66.9857	-44.1605	0.372356	0.368198	0.446374	0.582333	0.18096	0.308789	0.348611	0.373516	NaN	NaN	NaN	NaN	NaN	NaN	NaN	NaN	NaN	NaN
66.989	-44.1595	0.372358	0.3682	0.471719	0.538995	0.180963	0.308794	0.362691	0.357056	NaN	NaN	NaN	NaN	NaN	NaN	NaN	NaN	NaN	NaN
66.9906	-44.1591	0.37236	0.372453	0.478368	0.517274	0.180966	0.3088	0.36974	0.348822	NaN	NaN	NaN	NaN	NaN	NaN	NaN	NaN	NaN	NaN
66.9939	-44.1581	0.372362	0.38097	0.48531	0.484656	0.180969	0.308806	0.390892	0.324085	NaN	NaN	NaN	NaN	NaN	NaN	NaN	NaN	NaN	NaN
66.9971	-44.1571	0.372364	0.389506	0.485888	0.462887	0.180972	0.31402	0.398104	0.307582	NaN	NaN	NaN	NaN	NaN	NaN	NaN	NaN	NaN	NaN
66.9987	-44.1566	0.372366	0.389508	0.492266	0.451992	0.180976	0.319238	0.398266	0.299327	NaN	NaN	NaN	NaN	NaN	NaN	NaN	NaN	NaN	NaN
67.002	-44.1556	0.372368	0.389511	0.5114	0.430405	0.173742	0.334756	0.391513	0.291066	NaN	NaN	NaN	NaN	NaN	NaN	NaN	NaN	NaN	NaN
67.0036	-44.1551	0.37237	0.393781	0.511714	0.430634	0.166508	0.345059	0.391662	0.282809	NaN	NaN	NaN	NaN	NaN	NaN	NaN	NaN	NaN	NaN
67.0069	-44.1541	0.372372	0.402332	0.512332	0.442242	0.148456	0.355205	0.405802	0.266274	NaN	NaN	NaN	NaN	NaN	NaN	NaN	NaN	NaN	NaN
67.0085	-44.1536	0.372374	0.406616	0.506244	0.464603	0.137631	0.365494	0.405966	0.258002	NaN	NaN	NaN	NaN	NaN	NaN	NaN	NaN	NaN	NaN
67.0117	-44.1526	0.372376	0.410905	0.480974	0.519796	0.130453	0.375947	0.399207	0.249724	NaN	NaN	NaN	NaN	NaN	NaN	NaN	NaN	NaN	NaN
67.015	-44.1516	0.372378	0.410908	0.461849	0.552534	0.130455	0.386414	0.385353	0.249729	NaN	NaN	NaN	NaN	NaN	NaN	NaN	NaN	NaN	NaN
67.0166	-44.1511	0.37238	0.41091	0.455491	0.55224	0.134049	0.39165	0.37843	0.249734	NaN	NaN	NaN	NaN	NaN	NaN	NaN	NaN	NaN	NaN
67.0199	-44.1502	0.379265	0.402558	0.455497	0.507541	0.148401	0.402124	0.364565	0.249739	NaN	NaN	NaN	NaN	NaN	NaN	NaN	NaN	NaN	NaN
67.0215	-44.1498	0.382719	0.398383	0.455503	0.474084	0.159144	0.407369	0.357628	0.249743	NaN	NaN	NaN	NaN	NaN	NaN	NaN	NaN	NaN	NaN
67.0248	-44.1489	0.389533	0.39003	0.430051	0.473114	0.173437	0.423098	0.350948	0.233185	NaN	NaN	NaN	NaN	NaN	NaN	NaN	NaN	NaN	NaN
67.028	-44.1479	0.389533	0.390033	0.411012	0.48347	0.180574	0.433599	0.351214	0.216607	NaN	NaN	NaN	NaN	NaN	NaN	NaN	NaN	NaN	NaN
67.0296	-44.1474	0.389534	0.390036	0.404677	0.494324	0.180577	0.438858	0.351349	0.208313	NaN	NaN	NaN	NaN	NaN	NaN	NaN	NaN	NaN	NaN
67.0329	-44.1464	0.389534	0.385764	0.410785	0.494332	0.18058	0.438866	0.351356	0.208317	NaN	NaN	NaN	NaN	NaN	NaN	NaN	NaN	NaN	NaN
67.0345	-44.1459	0.389535	0.381497	0.416887	0.50545	0.177017	0.438874	0.35845	0.200027	NaN	NaN	NaN	NaN	NaN	NaN	NaN	NaN	NaN	NaN
67.0378	-44.1449	0.389536	0.372975	0.429069	0.527705	0.169881	0.438882	0.372644	0.183427	NaN	NaN	NaN	NaN	NaN	NaN	NaN	NaN	NaN	NaN
67.041	-44.1439	0.389536	0.368721	0.435154	0.549995	0.162733	0.42839	0.400771	0.166808	NaN	NaN	NaN	NaN	NaN	NaN	NaN	NaN	NaN	NaN
67.0427	-44.1434	0.389537	0.368724	0.43516	0.550003	0.162736	0.423152	0.407731	0.166811	NaN	NaN	NaN	NaN	NaN	NaN	NaN	NaN	NaN	NaN
67.0459	-44.1424	0.389537	0.360216	0.447326	0.550012	0.162739	0.412678	0.421632	0.166814	NaN	NaN	NaN	NaN	NaN	NaN	NaN	NaN	NaN	NaN
67.0476	-44.1419	0.389538	0.35597	0.453403	0.55002	0.162741	0.412686	0.42164	0.166817	NaN	NaN	NaN	NaN	NaN	NaN	NaN	NaN	NaN	NaN
67.0508	-44.141	0.389539	0.34749	0.465534	0.550029	0.162744	0.396969	0.442486	0.166821	NaN	NaN	NaN	NaN	NaN	NaN	NaN	NaN	NaN	NaN
67.0525	-44.1405	0.389539	0.347492	0.46554	0.550038	0.162747	0.381269	0.463308	0.166824	NaN	NaN	NaN	NaN	NaN	NaN	NaN	NaN	NaN	NaN
67.0557	-44.1396	0.386188	0.351648	0.459202	0.549754	0.166327	0.339502	0.511556	0.175141	NaN	NaN	NaN	NaN	NaN	NaN	NaN	NaN	NaN	NaN
67.059	-44.1387	0.379286	0.359957	0.446535	0.549176	0.173476	0.303072	0.545632	0.19176	NaN	NaN	NaN	NaN	NaN	NaN	NaN	NaN	NaN	NaN
67.0607	-44.1382	0.375847	0.364113	0.433879	0.548596	0.180618	0.292686	0.545222	0.20837	NaN	NaN	NaN	NaN	NaN	NaN	NaN	NaN	NaN	NaN
67.0639	-44.1372	0.372416	0.368269	0.414928	0.547718	0.191312	0.282307	0.523571	0.249837	NaN	NaN	NaN	NaN	NaN	NaN	NaN	NaN	NaN	NaN
67.0656	-44.1367	0.372418	0.368271	0.408621	0.54743	0.194875	0.282312	0.502362	0.274684	NaN	NaN	NaN	NaN	NaN	NaN	NaN	NaN	NaN	NaN
67.0688	-44.1357	0.37242	0.368274	0.414938	0.525558	0.198435	0.292702	0.453321	0.316009	NaN	NaN	NaN	NaN	NaN	NaN	NaN	NaN	NaN	NaN
67.0721	-44.1346	0.372422	0.368276	0.433902	0.493136	0.198439	0.308303	0.418566	0.332523	NaN	NaN	NaN	NaN	NaN	NaN	NaN	NaN	NaN	NaN
67.0737	-44.1341	0.372424	0.368278	0.446569	0.471481	0.198442	0.31872	0.404781	0.332529	NaN	NaN	NaN	NaN	NaN	NaN	NaN	NaN	NaN	NaN
67.077	-44.1331	0.372426	0.368281	0.459249	0.449805	0.198445	0.329144	0.405091	0.316027	NaN	NaN	NaN	NaN	NaN	NaN	NaN	NaN	NaN	NaN
67.0786	-44.1327	0.372428	0.368283	0.4656	0.438956	0.198449	0.339575	0.398345	0.307771	NaN	NaN	NaN	NaN	NaN	NaN	NaN	NaN	NaN	NaN
67.0819	-44.1317	0.37243	0.368285	0.465606	0.438962	0.198452	0.350014	0.405725	0.282971	NaN	NaN	NaN	NaN	NaN	NaN	NaN	NaN	NaN	NaN
67.0835	-44.1313	0.372432	0.368288	0.465612	0.438969	0.198455	0.355241	0.405882	0.274704	NaN	NaN	NaN	NaN	NaN	NaN	NaN	NaN	NaN	NaN
67.0868	-44.1304	0.372434	0.36829	0.465618	0.461157	0.191341	0.360472	0.413116	0.25815	NaN	NaN	NaN	NaN	NaN	NaN	NaN	NaN	NaN	NaN
67.0901	-44.1294	0.372436	0.368292	0.465624	0.494486	0.180652	0.360478	0.420204	0.249868	NaN	NaN	NaN	NaN	NaN	NaN	NaN	NaN	NaN	NaN
67.0917	-44.129	0.372438	0.368295	0.46563	0.516746	0.173514	0.360485	0.420212	0.249873	NaN	NaN	NaN	NaN	NaN	NaN	NaN	NaN	NaN	NaN
67.095	-44.128	0.37244	0.368297	0.478325	0.539594	0.15922	0.360491	0.42022	0.249878	NaN	NaN	NaN	NaN	NaN	NaN	NaN	NaN	NaN	NaN
67.0966	-44.1275	0.372442	0.3683	0.484684	0.55106	0.152057	0.360498	0.420228	0.249882	NaN	NaN	NaN	NaN	NaN	NaN	NaN	NaN	NaN	NaN
67.0999	-44.1265	0.372444	0.368302	0.510134	0.529881	0.144888	0.360504	0.420235	0.249887	NaN	NaN	NaN	NaN	NaN	NaN	NaN	NaN	NaN	NaN
67.1031	-44.1254	0.372445	0.368304	0.522885	0.485735	0.144751	0.365423	0.427166	0.23315	NaN	NaN	NaN	NaN	NaN	NaN	NaN	NaN	NaN	NaN
67.1047	-44.1249	0.372447	0.368307	0.522892	0.474582	0.144683	0.365271	0.434093	0.224789	NaN	NaN	NaN	NaN	NaN	NaN	NaN	NaN	NaN	NaN
67.108	-44.1239	0.372449	0.368309	0.503781	0.462714	0.1517	0.364959	0.447925	0.208077	NaN	NaN	NaN	NaN	NaN	NaN	NaN	NaN	NaN	NaN
67.1096	-44.1234	0.372451	0.368311	0.491065	0.462218	0.15885	0.359754	0.447759	0.21637	NaN	NaN	NaN	NaN	NaN	NaN	NaN	NaN	NaN	NaN
67.1129	-44.1224	0.365652	0.376652	0.459323	0.46099	0.176681	0.35976	0.412392	0.241066	NaN	NaN	NaN	NaN	NaN	NaN	NaN	NaN	NaN	NaN
67.1145	-44.1219	0.362129	0.380823	0.446661	0.460489	0.183802	0.359767	0.384148	0.265785	NaN	NaN	NaN	NaN	NaN	NaN	NaN	NaN	NaN	NaN
67.1178	-44.121	0.351595	0.39335	0.440336	0.43811	0.194464	0.359773	0.320769	0.306593	NaN	NaN	NaN	NaN	NaN	NaN	NaN	NaN	NaN	NaN
67.1211	-44.1201	0.3446	0.401724	0.453009	0.405384	0.198016	0.35978	0.271617	0.339111	NaN	NaN	NaN	NaN	NaN	NaN	NaN	NaN	NaN	NaN
67.1227	-44.1196	0.341118	0.405912	0.465694	0.383696	0.198019	0.359786	0.257602	0.338871	NaN	NaN	NaN	NaN	NaN	NaN	NaN	NaN	NaN	NaN
67.126	-44.1187	0.337645	0.4101	0.484753	0.351098	0.198023	0.359793	0.243594	0.33863	NaN	NaN	NaN	NaN	NaN	NaN	NaN	NaN	NaN	NaN
67.1277	-44.1181	0.337648	0.410103	0.491118	0.340222	0.198026	0.359799	0.243599	0.330323	NaN	NaN	NaN	NaN	NaN	NaN	NaN	NaN	NaN	NaN
67.131	-44.1171	0.33765	0.410105	0.497489	0.329337	0.198029	0.359805	0.257616	0.313935	NaN	NaN	NaN	NaN	NaN	NaN	NaN	NaN	NaN	NaN
67.1343	-44.1161	0.344613	0.401736	0.497495	0.351475	0.190932	0.370241	0.271858	0.28111	NaN	NaN	NaN	NaN	NaN	NaN	NaN	NaN	NaN	NaN
67.1359	-44.1156	0.348109	0.397553	0.497501	0.36256	0.18738	0.375467	0.286022	0.256453	NaN	NaN	NaN	NaN	NaN	NaN	NaN	NaN	NaN	NaN
67.1392	-44.1145	0.358636	0.385014	0.497508	0.38475	0.180265	0.385921	0.300322	0.223524	NaN	NaN	NaN	NaN	NaN	NaN	NaN	NaN	NaN	NaN
67.1408	-44.114	0.362156	0.380848	0.497514	0.384756	0.180268	0.385928	0.314409	0.20705	NaN	NaN	NaN	NaN	NaN	NaN	NaN	NaN	NaN	NaN
67.1441	-44.1131	0.369095	0.372511	0.510248	0.362983	0.180271	0.385935	0.335564	0.182304	NaN	NaN	NaN	NaN	NaN	NaN	NaN	NaN	NaN	NaN
67.1473	-44.1121	0.372479	0.368344	0.523002	0.341172	0.180274	0.385942	0.349685	0.165789	NaN	NaN	NaN	NaN	NaN	NaN	NaN	NaN	NaN	NaN
67.149	-44.1117	0.372481	0.368347	0.52939	0.330256	0.180277	0.380723	0.356618	0.165792	NaN	NaN	NaN	NaN	NaN	NaN	NaN	NaN	NaN	NaN
67.1523	-44.1107	0.372483	0.368349	0.529397	0.330261	0.18028	0.370287	0.370464	0.165795	NaN	NaN	NaN	NaN	NaN	NaN	NaN	NaN	NaN	NaN
67.1539	-44.1103	0.372485	0.368352	0.529404	0.330266	0.180283	0.365077	0.377385	0.165798	NaN	NaN	NaN	NaN	NaN	NaN	NaN	NaN	NaN	NaN
67.1572	-44.1093	0.372487	0.368354	0.523029	0.341194	0.180286	0.349441	0.398121	0.165801	NaN	NaN	NaN	NaN	NaN	NaN	NaN	NaN	NaN	NaN
67.1588	-44.1088	0.372489	0.368356	0.516659	0.352112	0.180289	0.344237	0.405032	0.165805	NaN	NaN	NaN	NaN	NaN	NaN	NaN	NaN	NaN	NaN
67.1621	-44.1078	0.369112	0.372528	0.497557	0.384819	0.180292	0.333832	0.418834	0.165808	NaN	NaN	NaN	NaN	NaN	NaN	NaN	NaN	NaN	NaN
67.1654	-44.1068	0.36218	0.389395	0.466362	0.417459	0.180295	0.323428	0.432633	0.165811	NaN	NaN	NaN	NaN	NaN	NaN	NaN	NaN	NaN	NaN
67.167	-44.1063	0.358665	0.397845	0.453944	0.42833	0.180298	0.318234	0.439531	0.165814	NaN	NaN	NaN	NaN	NaN	NaN	NaN	NaN	NaN	NaN
67.1703	-44.1053	0.355159	0.410589	0.42909	0.450054	0.180301	0.307848	0.453304	0.174135	NaN	NaN	NaN	NaN	NaN	NaN	NaN	NaN	NaN	NaN
67.1719	-44.1048	0.355162	0.410591	0.422752	0.460914	0.180304	0.307854	0.453312	0.182461	NaN	NaN	NaN	NaN	NaN	NaN	NaN	NaN	NaN	NaN
67.1752	-44.1038	0.355164	0.410594	0.410085	0.460411	0.187427	0.307859	0.453321	0.199123	NaN	NaN	NaN	NaN	NaN	NaN	NaN	NaN	NaN	NaN
67.1785	-44.1029	0.355167	0.410597	0.403763	0.449089	0.194539	0.307865	0.453329	0.207462	NaN	NaN	NaN	NaN	NaN	NaN	NaN	NaN	NaN	NaN
67.1801	-44.1024	0.355169	0.410599	0.403768	0.438032	0.198092	0.30787	0.453338	0.207466	NaN	NaN	NaN	NaN	NaN	NaN	NaN	NaN	NaN	NaN
67.1834	-44.1015	0.355172	0.410602	0.403773	0.438039	0.198095	0.307876	0.453346	0.20747	NaN	NaN	NaN	NaN	NaN	NaN	NaN	NaN	NaN	NaN
67.1851	-44.101	0.355175	0.410605	0.403778	0.438045	0.198099	0.302684	0.460239	0.207474	NaN	NaN	NaN	NaN	NaN	NaN	NaN	NaN	NaN	NaN
67.1884	-44.1001	0.355177	0.410607	0.403783	0.438052	0.198102	0.292305	0.474003	0.207478	NaN	NaN	NaN	NaN	NaN	NaN	NaN	NaN	NaN	NaN
67.19	-44.0996	0.35518	0.41061	0.403789	0.438059	0.198105	0.287122	0.480883	0.207482	NaN	NaN	NaN	NaN	NaN	NaN	NaN	NaN	NaN	NaN
67.1933	-44.0985	0.355182	0.410613	0.403794	0.438065	0.198109	0.281943	0.487758	0.207486	NaN	NaN	NaN	NaN	NaN	NaN	NaN	NaN	NaN	NaN
67.1966	-44.0974	0.355185	0.410615	0.403799	0.438072	0.190814	0.29207	0.480708	0.215754	NaN	NaN	NaN	NaN	NaN	NaN	NaN	NaN	NaN	NaN
67.1982	-44.0969	0.355188	0.410618	0.403804	0.438079	0.187172	0.297131	0.473662	0.224018	NaN	NaN	NaN	NaN	NaN	NaN	NaN	NaN	NaN	NaN
67.2015	-44.0958	0.35519	0.410621	0.40381	0.438085	0.179893	0.307237	0.459572	0.240528	NaN	NaN	NaN	NaN	NaN	NaN	NaN	NaN	NaN	NaN
67.2032	-44.0953	0.355193	0.406339	0.409902	0.438092	0.179896	0.307242	0.445489	0.24869	NaN	NaN	NaN	NaN	NaN	NaN	NaN	NaN	NaN	NaN
67.2065	-44.0943	0.355195	0.397785	0.422065	0.438099	0.179899	0.307248	0.431414	0.248519	NaN	NaN	NaN	NaN	NaN	NaN	NaN	NaN	NaN	NaN
67.2098	-44.0934	0.355198	0.38925	0.434205	0.438105	0.179902	0.307253	0.410319	0.256581	NaN	NaN	NaN	NaN	NaN	NaN	NaN	NaN	NaN	NaN
67.2114	-44.093	0.355201	0.389253	0.434211	0.438112	0.179905	0.307259	0.403295	0.264816	NaN	NaN	NaN	NaN	NaN	NaN	NaN	NaN	NaN	NaN
67.2147	-44.0921	0.355203	0.389255	0.440545	0.427291	0.179908	0.307264	0.389251	0.281267	NaN	NaN	NaN	NaN	NaN	NaN	NaN	NaN	NaN	NaN
67.2164	-44.0916	0.355206	0.389258	0.446885	0.41646	0.179911	0.307269	0.382238	0.289488	NaN	NaN	NaN	NaN	NaN	NaN	NaN	NaN	NaN	NaN
67.2197	-44.0907	0.355208	0.38926	0.459575	0.394764	0.179914	0.307275	0.368202	0.305928	NaN	NaN	NaN	NaN	NaN	NaN	NaN	NaN	NaN	NaN
67.2213	-44.0902	0.355211	0.389263	0.465931	0.383904	0.179917	0.30728	0.361194	0.314144	NaN	NaN	NaN	NaN	NaN	NaN	NaN	NaN	NaN	NaN
67.2246	-44.0892	0.355214	0.389265	0.465937	0.38391	0.17992	0.307286	0.347181	0.330556	NaN	NaN	NaN	NaN	NaN	NaN	NaN	NaN	NaN	NaN
67.2279	-44.0881	0.355216	0.389268	0.465943	0.383916	0.179923	0.307291	0.361207	0.314156	NaN	NaN	NaN	NaN	NaN	NaN	NaN	NaN	NaN	NaN
67.2296	-44.0875	0.355219	0.38927	0.465949	0.383922	0.179926	0.307297	0.36823	0.305952	NaN	NaN	NaN	NaN	NaN	NaN	NaN	NaN	NaN	NaN
67.2329	-44.0865	0.355221	0.389273	0.465955	0.383928	0.179929	0.307302	0.382281	0.289521	NaN	NaN	NaN	NaN	NaN	NaN	NaN	NaN	NaN	NaN
67.2345	-44.0859	0.355224	0.389275	0.465961	0.383934	0.179932	0.307308	0.382288	0.289527	NaN	NaN	NaN	NaN	NaN	NaN	NaN	NaN	NaN	NaN
67.2378	-44.0849	0.355227	0.389277	0.465967	0.38394	0.179935	0.307313	0.382295	0.289532	NaN	NaN	NaN	NaN	NaN	NaN	NaN	NaN	NaN	NaN
67.2411	-44.0839	0.355229	0.38928	0.465973	0.383946	0.179938	0.307319	0.396349	0.273099	NaN	NaN	NaN	NaN	NaN	NaN	NaN	NaN	NaN	NaN
67.2428	-44.0834	0.355232	0.389282	0.465979	0.383951	0.179941	0.307324	0.403385	0.264877	NaN	NaN	NaN	NaN	NaN	NaN	NaN	NaN	NaN	NaN
67.2461	-44.0825	0.355234	0.389285	0.465985	0.383957	0.179944	0.30733	0.417464	0.248413	NaN	NaN	NaN	NaN	NaN	NaN	NaN	NaN	NaN	NaN
67.2477	-44.082	0.355237	0.389287	0.465991	0.383963	0.179947	0.307335	0.417471	0.248418	NaN	NaN	NaN	NaN	NaN	NaN	NaN	NaN	NaN	NaN
67.251	-44.0811	0.35524	0.38929	0.465997	0.383969	0.17995	0.307341	0.431551	0.231951	NaN	NaN	NaN	NaN	NaN	NaN	NaN	NaN	NaN	NaN
67.2543	-44.0802	0.355242	0.389292	0.466003	0.383975	0.179953	0.307346	0.445647	0.215464	NaN	NaN	NaN	NaN	NaN	NaN	NaN	NaN	NaN	NaN
67.256	-44.0797	0.355245	0.389295	0.466009	0.383981	0.179956	0.307352	0.452706	0.207215	NaN	NaN	NaN	NaN	NaN	NaN	NaN	NaN	NaN	NaN
67.2592	-44.0787	0.355247	0.389297	0.466015	0.372911	0.183512	0.312544	0.445844	0.207219	NaN	NaN	NaN	NaN	NaN	NaN	NaN	NaN	NaN	NaN
67.2609	-44.0781	0.35525	0.3893	0.466021	0.361849	0.187067	0.317739	0.438977	0.207223	NaN	NaN	NaN	NaN	NaN	NaN	NaN	NaN	NaN	NaN
67.2642	-44.0771	0.355253	0.389302	0.466027	0.339745	0.194163	0.328134	0.425221	0.207227	NaN	NaN	NaN	NaN	NaN	NaN	NaN	NaN	NaN	NaN
67.2658	-44.0766	0.355255	0.389305	0.466033	0.328708	0.197709	0.33334	0.41834	0.207231	NaN	NaN	NaN	NaN	NaN	NaN	NaN	NaN	NaN	NaN
67.2691	-44.0755	0.355258	0.389307	0.466039	0.328713	0.197712	0.333346	0.418348	0.207235	NaN	NaN	NaN	NaN	NaN	NaN	NaN	NaN	NaN	NaN
67.2723	-44.0745	0.35526	0.389309	0.466045	0.328718	0.197716	0.333352	0.418356	0.207239	NaN	NaN	NaN	NaN	NaN	NaN	NaN	NaN	NaN	NaN
67.274	-44.074	0.355263	0.389312	0.466051	0.328723	0.197719	0.333358	0.418364	0.207243	NaN	NaN	NaN	NaN	NaN	NaN	NaN	NaN	NaN	NaN
67.2773	-44.073	0.355266	0.389314	0.466057	0.328728	0.197722	0.333364	0.418372	0.207247	NaN	NaN	NaN	NaN	NaN	NaN	NaN	NaN	NaN	NaN
67.2789	-44.0726	0.355268	0.389317	0.466063	0.328733	0.197726	0.333369	0.418379	0.207251	NaN	NaN	NaN	NaN	NaN	NaN	NaN	NaN	NaN	NaN
67.2822	-44.0716	0.355271	0.389319	0.466069	0.328738	0.197729	0.333375	0.404287	0.223759	NaN	NaN	NaN	NaN	NaN	NaN	NaN	NaN	NaN	NaN
67.2854	-44.0707	0.355273	0.389322	0.466075	0.328743	0.197732	0.333381	0.39021	0.240248	NaN	NaN	NaN	NaN	NaN	NaN	NaN	NaN	NaN	NaN
67.2871	-44.0702	0.355276	0.385055	0.47215	0.328748	0.197735	0.333387	0.383181	0.248488	NaN	NaN	NaN	NaN	NaN	NaN	NaN	NaN	NaN	NaN
67.2903	-44.0692	0.355279	0.376532	0.484276	0.328753	0.197739	0.333393	0.376148	0.256733	NaN	NaN	NaN	NaN	NaN	NaN	NaN	NaN	NaN	NaN
67.292	-44.0687	0.355281	0.372279	0.490333	0.328758	0.197742	0.333399	0.369119	0.264972	NaN	NaN	NaN	NaN	NaN	NaN	NaN	NaN	NaN	NaN
67.2952	-44.0677	0.355284	0.368031	0.496385	0.328763	0.197745	0.333405	0.355065	0.281433	NaN	NaN	NaN	NaN	NaN	NaN	NaN	NaN	NaN	NaN
67.2969	-44.0672	0.355286	0.368033	0.496391	0.328768	0.197748	0.333411	0.348047	0.289659	NaN	NaN	NaN	NaN	NaN	NaN	NaN	NaN	NaN	NaN
67.3002	-44.0662	0.355289	0.368035	0.496397	0.328773	0.197752	0.333417	0.348053	0.289664	NaN	NaN	NaN	NaN	NaN	NaN	NaN	NaN	NaN	NaN
67.3034	-44.0651	0.355292	0.368037	0.496404	0.328778	0.197755	0.323024	0.361839	0.28967	NaN	NaN	NaN	NaN	NaN	NaN	NaN	NaN	NaN	NaN
67.3051	-44.0646	0.355294	0.36804	0.49641	0.328783	0.197758	0.317835	0.368728	0.289675	NaN	NaN	NaN	NaN	NaN	NaN	NaN	NaN	NaN	NaN
67.3084	-44.0636	0.355297	0.368042	0.496416	0.328788	0.197762	0.307461	0.382488	0.289681	NaN	NaN	NaN	NaN	NaN	NaN	NaN	NaN	NaN	NaN
67.31	-44.0631	0.355299	0.368044	0.496423	0.328793	0.197765	0.307467	0.382495	0.289686	NaN	NaN	NaN	NaN	NaN	NaN	NaN	NaN	NaN	NaN
67.3133	-44.0621	0.355302	0.368046	0.496429	0.328798	0.197768	0.297093	0.396253	0.289692	NaN	NaN	NaN	NaN	NaN	NaN	NaN	NaN	NaN	NaN
67.3166	-44.0611	0.355305	0.368049	0.496435	0.328803	0.197771	0.286733	0.409992	0.289697	NaN	NaN	NaN	NaN	NaN	NaN	NaN	NaN	NaN	NaN
67.3183	-44.0607	0.355307	0.368051	0.496442	0.328808	0.197775	0.281559	0.416859	0.289703	NaN	NaN	NaN	NaN	NaN	NaN	NaN	NaN	NaN	NaN
67.3215	-44.0597	0.35531	0.368053	0.496448	0.328813	0.197778	0.281564	0.416867	0.289708	NaN	NaN	NaN	NaN	NaN	NaN	NaN	NaN	NaN	NaN
67.3232	-44.0592	0.355312	0.368055	0.496454	0.328818	0.197781	0.281569	0.416875	0.289714	NaN	NaN	NaN	NaN	NaN	NaN	NaN	NaN	NaN	NaN
67.3265	-44.0582	0.355315	0.368058	0.496461	0.328823	0.197784	0.281574	0.416883	0.289719	NaN	NaN	NaN	NaN	NaN	NaN	NaN	NaN	NaN	NaN
67.3298	-44.0572	0.355318	0.36806	0.483766	0.350564	0.197788	0.281579	0.430944	0.273275	NaN	NaN	NaN	NaN	NaN	NaN	NaN	NaN	NaN	NaN
67.3314	-44.0567	0.35532	0.368062	0.477429	0.361423	0.197791	0.281584	0.437985	0.265048	NaN	NaN	NaN	NaN	NaN	NaN	NaN	NaN	NaN	NaN
67.3347	-44.0557	0.355323	0.368064	0.464765	0.383109	0.197794	0.281589	0.452072	0.248573	NaN	NaN	NaN	NaN	NaN	NaN	NaN	NaN	NaN	NaN
67.3364	-44.0552	0.355325	0.368067	0.464771	0.383115	0.197797	0.281594	0.45208	0.248578	NaN	NaN	NaN	NaN	NaN	NaN	NaN	NaN	NaN	NaN
67.3397	-44.0541	0.355328	0.368069	0.464777	0.38312	0.197801	0.281599	0.466168	0.232101	NaN	NaN	NaN	NaN	NaN	NaN	NaN	NaN	NaN	NaN
67.3413	-44.0536	0.355331	0.368071	0.464782	0.383126	0.197804	0.281604	0.473223	0.223857	NaN	NaN	NaN	NaN	NaN	NaN	NaN	NaN	NaN	NaN
67.3446	-44.0526	0.355333	0.368073	0.464788	0.383132	0.190519	0.291718	0.487335	0.207349	NaN	NaN	NaN	NaN	NaN	NaN	NaN	NaN	NaN	NaN
67.3479	-44.0516	0.355336	0.368076	0.464794	0.383138	0.183245	0.301816	0.487344	0.207353	NaN	NaN	NaN	NaN	NaN	NaN	NaN	NaN	NaN	NaN
67.3495	-44.0511	0.355338	0.368078	0.4648	0.383143	0.179613	0.306863	0.487353	0.207357	NaN	NaN	NaN	NaN	NaN	NaN	NaN	NaN	NaN	NaN
67.3528	-44.0501	0.355341	0.36808	0.464806	0.383149	0.179616	0.306868	0.487362	0.224022	NaN	NaN	NaN	NaN	NaN	NaN	NaN	NaN	NaN	NaN
67.3545	-44.0496	0.358855	0.363924	0.464812	0.383155	0.179619	0.306874	0.480317	0.240623	NaN	NaN	NaN	NaN	NaN	NaN	NaN	NaN	NaN	NaN
67.3578	-44.0486	0.365907	0.351363	0.470868	0.383161	0.179622	0.306879	0.466229	0.273819	NaN	NaN	NaN	NaN	NaN	NaN	NaN	NaN	NaN	NaN
67.3611	-44.0476	0.372643	0.334585	0.482958	0.383167	0.179625	0.306885	0.445113	0.298552	NaN	NaN	NaN	NaN	NaN	NaN	NaN	NaN	NaN	NaN
67.3627	-44.0471	0.372645	0.33036	0.488996	0.383172	0.179628	0.30689	0.438083	0.306796	NaN	NaN	NaN	NaN	NaN	NaN	NaN	NaN	NaN	NaN
67.366	-44.0461	0.372647	0.32614	0.501362	0.372341	0.179631	0.306896	0.424026	0.323265	NaN	NaN	NaN	NaN	NaN	NaN	NaN	NaN	NaN	NaN
67.3677	-44.0456	0.372649	0.326142	0.507707	0.361499	0.179634	0.306901	0.417006	0.331495	NaN	NaN	NaN	NaN	NaN	NaN	NaN	NaN	NaN	NaN
67.371	-44.0446	0.372651	0.326144	0.520405	0.339783	0.179637	0.306906	0.402957	0.347953	NaN	NaN	NaN	NaN	NaN	NaN	NaN	NaN	NaN	NaN
67.3726	-44.0441	0.372653	0.326146	0.526766	0.328913	0.17964	0.306912	0.395942	0.356178	NaN	NaN	NaN	NaN	NaN	NaN	NaN	NaN	NaN	NaN
67.3759	-44.0431	0.372655	0.326148	0.526773	0.328918	0.179643	0.306917	0.38893	0.364398	NaN	NaN	NaN	NaN	NaN	NaN	NaN	NaN	NaN	NaN
67.3792	-44.0421	0.372657	0.32615	0.526779	0.328923	0.179646	0.306923	0.402979	0.347973	NaN	NaN	NaN	NaN	NaN	NaN	NaN	NaN	NaN	NaN
67.3809	-44.0416	0.372659	0.326152	0.526786	0.328928	0.179648	0.306928	0.410014	0.339755	NaN	NaN	NaN	NaN	NaN	NaN	NaN	NaN	NaN	NaN
67.3842	-44.0406	0.372661	0.326154	0.514089	0.350675	0.179651	0.317297	0.403323	0.314842	NaN	NaN	NaN	NaN	NaN	NaN	NaN	NaN	NaN	NaN
67.3858	-44.04	0.372663	0.326156	0.507751	0.361538	0.179654	0.322489	0.396459	0.306509	NaN	NaN	NaN	NaN	NaN	NaN	NaN	NaN	NaN	NaN
67.3891	-44.039	0.372665	0.326158	0.495085	0.38323	0.179657	0.332879	0.382708	0.289851	NaN	NaN	NaN	NaN	NaN	NaN	NaN	NaN	NaN	NaN
67.3924	-44.038	0.372667	0.334609	0.48303	0.383236	0.183296	0.327842	0.382715	0.289856	NaN	NaN	NaN	NaN	NaN	NaN	NaN	NaN	NaN	NaN
67.3941	-44.0375	0.372669	0.338843	0.476997	0.383242	0.186938	0.322802	0.382723	0.289862	NaN	NaN	NaN	NaN	NaN	NaN	NaN	NaN	NaN	NaN
67.3974	-44.0365	0.372671	0.347324	0.464906	0.383248	0.194226	0.312705	0.38273	0.289867	NaN	NaN	NaN	NaN	NaN	NaN	NaN	NaN	NaN	NaN
67.3991	-44.036	0.372673	0.347326	0.464911	0.394304	0.19433	0.307653	0.382737	0.289873	NaN	NaN	NaN	NaN	NaN	NaN	NaN	NaN	NaN	NaN
67.4024	-44.035	0.372675	0.351568	0.458869	0.416436	0.187234	0.307658	0.382744	0.289878	NaN	NaN	NaN	NaN	NaN	NaN	NaN	NaN	NaN	NaN
67.404	-44.0345	0.372677	0.355815	0.45282	0.427519	0.183683	0.312856	0.375872	0.289884	NaN	NaN	NaN	NaN	NaN	NaN	NaN	NaN	NaN	NaN
67.4073	-44.0335	0.372679	0.364321	0.440699	0.438612	0.180129	0.323254	0.376172	0.27343	NaN	NaN	NaN	NaN	NaN	NaN	NaN	NaN	NaN	NaN
67.4106	-44.0325	0.372681	0.368583	0.434632	0.438618	0.180132	0.333667	0.376471	0.256957	NaN	NaN	NaN	NaN	NaN	NaN	NaN	NaN	NaN	NaN
67.4123	-44.032	0.372683	0.368585	0.434638	0.438625	0.180135	0.333673	0.383524	0.248715	NaN	NaN	NaN	NaN	NaN	NaN	NaN	NaN	NaN	NaN
67.4156	-44.031	0.372685	0.368587	0.434643	0.438631	0.180138	0.338881	0.383681	0.240476	NaN	NaN	NaN	NaN	NaN	NaN	NaN	NaN	NaN	NaN
67.4172	-44.0305	0.372687	0.36859	0.434649	0.438638	0.180141	0.344093	0.383837	0.232233	NaN	NaN	NaN	NaN	NaN	NaN	NaN	NaN	NaN	NaN
67.4205	-44.0295	0.372689	0.368592	0.434654	0.438645	0.180144	0.35452	0.384142	0.232396	NaN	NaN	NaN	NaN	NaN	NaN	NaN	NaN	NaN	NaN
67.4238	-44.0284	0.372691	0.368594	0.43466	0.438651	0.180147	0.359742	0.398414	0.224303	NaN	NaN	NaN	NaN	NaN	NaN	NaN	NaN	NaN	NaN
67.4255	-44.0279	0.372693	0.368597	0.434665	0.438658	0.18015	0.359748	0.405486	0.224389	NaN	NaN	NaN	NaN	NaN	NaN	NaN	NaN	NaN	NaN
67.4288	-44.0269	0.372695	0.368599	0.434671	0.438665	0.180153	0.359755	0.426703	0.199567	NaN	NaN	NaN	NaN	NaN	NaN	NaN	NaN	NaN	NaN
67.4305	-44.0264	0.372697	0.368601	0.434677	0.438671	0.180156	0.359761	0.433784	0.191292	NaN	NaN	NaN	NaN	NaN	NaN	NaN	NaN	NaN	NaN
67.4338	-44.0254	0.372699	0.368604	0.434682	0.438678	0.180159	0.354552	0.45486	0.191423	NaN	NaN	NaN	NaN	NaN	NaN	NaN	NaN	NaN	NaN
67.4371	-44.0244	0.372701	0.368606	0.434688	0.438685	0.180162	0.344136	0.475761	0.199851	NaN	NaN	NaN	NaN	NaN	NaN	NaN	NaN	NaN	NaN
67.4387	-44.0239	0.372703	0.368608	0.434693	0.438691	0.180165	0.338935	0.482666	0.208221	NaN	NaN	NaN	NaN	NaN	NaN	NaN	NaN	NaN	NaN
67.442	-44.0229	0.372705	0.368611	0.434699	0.438698	0.180168	0.333738	0.489568	0.208225	NaN	NaN	NaN	NaN	NaN	NaN	NaN	NaN	NaN	NaN
67.4437	-44.0223	0.372707	0.368613	0.434704	0.438705	0.180171	0.333744	0.489577	0.208229	NaN	NaN	NaN	NaN	NaN	NaN	NaN	NaN	NaN	NaN
67.447	-44.0213	0.372709	0.368615	0.422034	0.43823	0.187287	0.33375	0.482502	0.216527	NaN	NaN	NaN	NaN	NaN	NaN	NaN	NaN	NaN	NaN
67.4486	-44.0208	0.372711	0.368618	0.415709	0.437995	0.190842	0.333756	0.47543	0.224821	NaN	NaN	NaN	NaN	NaN	NaN	NaN	NaN	NaN	NaN
67.4519	-44.0198	0.369386	0.372792	0.40307	0.437518	0.205235	0.323646	0.454212	0.249675	NaN	NaN	NaN	NaN	NaN	NaN	NaN	NaN	NaN	NaN
67.4552	-44.0188	0.362477	0.381138	0.396752	0.448341	0.212543	0.313521	0.425952	0.274402	NaN	NaN	NaN	NaN	NaN	NaN	NaN	NaN	NaN	NaN
67.4569	-44.0183	0.358957	0.385312	0.390439	0.459155	0.216203	0.308455	0.411842	0.28257	NaN	NaN	NaN	NaN	NaN	NaN	NaN	NaN	NaN	NaN
67.4602	-44.0173	0.355447	0.389487	0.377824	0.48075	0.216206	0.308461	0.383645	0.298875	NaN	NaN	NaN	NaN	NaN	NaN	NaN	NaN	NaN	NaN
67.4618	-44.0168	0.35545	0.389489	0.371527	0.491536	0.21621	0.303259	0.376465	0.307017	NaN	NaN	NaN	NaN	NaN	NaN	NaN	NaN	NaN	NaN
67.4651	-44.0157	0.355452	0.389492	0.371531	0.491543	0.216213	0.292859	0.37618	0.323497	NaN	NaN	NaN	NaN	NaN	NaN	NaN	NaN	NaN	NaN
67.4684	-44.0147	0.355455	0.389494	0.371536	0.491551	0.216217	0.282472	0.382922	0.315033	NaN	NaN	NaN	NaN	NaN	NaN	NaN	NaN	NaN	NaN
67.4701	-44.0142	0.355458	0.389497	0.37154	0.491558	0.216221	0.282477	0.382929	0.306695	NaN	NaN	NaN	NaN	NaN	NaN	NaN	NaN	NaN	NaN
67.4734	-44.0132	0.35546	0.389499	0.371545	0.491565	0.216224	0.282482	0.382936	0.290026	NaN	NaN	NaN	NaN	NaN	NaN	NaN	NaN	NaN	NaN
67.475	-44.0127	0.355463	0.389502	0.37155	0.491573	0.216228	0.282487	0.382943	0.290032	NaN	NaN	NaN	NaN	NaN	NaN	NaN	NaN	NaN	NaN
67.4783	-44.0117	0.355465	0.385231	0.383932	0.4808	0.216231	0.282492	0.38295	0.290037	NaN	NaN	NaN	NaN	NaN	NaN	NaN	NaN	NaN	NaN
67.48	-44.0112	0.355468	0.380965	0.396314	0.470017	0.216235	0.282497	0.382957	0.290043	NaN	NaN	NaN	NaN	NaN	NaN	NaN	NaN	NaN	NaN
67.4833	-44.0102	0.355471	0.372446	0.421071	0.448415	0.216238	0.282502	0.382964	0.290048	NaN	NaN	NaN	NaN	NaN	NaN	NaN	NaN	NaN	NaN
67.4866	-44.0092	0.355473	0.368194	0.433451	0.437603	0.216242	0.282507	0.390005	0.281822	NaN	NaN	NaN	NaN	NaN	NaN	NaN	NaN	NaN	NaN
67.4882	-44.0087	0.355476	0.368197	0.433457	0.437609	0.216246	0.282512	0.39705	0.273591	NaN	NaN	NaN	NaN	NaN	NaN	NaN	NaN	NaN	NaN
67.4915	-44.0077	0.355478	0.368199	0.439782	0.448923	0.209152	0.282517	0.411144	0.257108	NaN	NaN	NaN	NaN	NaN	NaN	NaN	NaN	NaN	NaN
67.4932	-44.0072	0.355481	0.368201	0.446113	0.449181	0.205603	0.282522	0.418202	0.248861	NaN	NaN	NaN	NaN	NaN	NaN	NaN	NaN	NaN	NaN
67.4965	-44.0061	0.355484	0.368203	0.458787	0.449688	0.198492	0.287723	0.411327	0.248865	NaN	NaN	NaN	NaN	NaN	NaN	NaN	NaN	NaN	NaN
67.4998	-44.0051	0.362522	0.359886	0.465134	0.44993	0.194938	0.298129	0.411654	0.232369	NaN	NaN	NaN	NaN	NaN	NaN	NaN	NaN	NaN	NaN
67.5014	-44.0046	0.366056	0.355729	0.471478	0.450186	0.191381	0.30334	0.411821	0.224115	NaN	NaN	NaN	NaN	NaN	NaN	NaN	NaN	NaN	NaN
67.5047	-44.0036	0.372753	0.347412	0.484177	0.450691	0.19157	0.29841	0.419051	0.207589	NaN	NaN	NaN	NaN	NaN	NaN	NaN	NaN	NaN	NaN
67.5063	-44.0031	0.372755	0.347414	0.490537	0.450946	0.191666	0.293337	0.419058	0.207593	NaN	NaN	NaN	NaN	NaN	NaN	NaN	NaN	NaN	NaN
67.5096	-44.002	0.372757	0.347416	0.50962	0.418309	0.20633	0.273007	0.419066	0.207597	NaN	NaN	NaN	NaN	NaN	NaN	NaN	NaN	NaN	NaN
67.5112	-44.0015	0.372759	0.347418	0.515993	0.40742	0.210003	0.267921	0.419074	0.207601	NaN	NaN	NaN	NaN	NaN	NaN	NaN	NaN	NaN	NaN
67.5145	-44.0005	0.372761	0.34742	0.535121	0.396941	0.213891	0.25264	0.419082	0.207605	NaN	NaN	NaN	NaN	NaN	NaN	NaN	NaN	NaN	NaN
67.5178	-43.9995	0.372763	0.347422	0.54789	0.397381	0.214101	0.242443	0.419089	0.207608	NaN	NaN	NaN	NaN	NaN	NaN	NaN	NaN	NaN	NaN
67.5194	-43.999	0.372765	0.347424	0.554286	0.408748	0.210632	0.237341	0.419097	0.207612	NaN	NaN	NaN	NaN	NaN	NaN	NaN	NaN	NaN	NaN
67.5227	-43.998	0.372767	0.347427	0.560688	0.420126	0.207159	0.232235	0.419105	0.207616	NaN	NaN	NaN	NaN	NaN	NaN	NaN	NaN	NaN	NaN
67.5243	-43.9975	0.372769	0.347429	0.560695	0.431304	0.203578	0.232239	0.419113	0.20762	NaN	NaN	NaN	NaN	NaN	NaN	NaN	NaN	NaN	NaN
67.5276	-43.9965	0.372771	0.347431	0.560702	0.431311	0.203581	0.232243	0.419121	0.190943	NaN	NaN	NaN	NaN	NaN	NaN	NaN	NaN	NaN	NaN
67.5309	-43.9956	0.36946	0.351593	0.547925	0.430864	0.203386	0.242464	0.419128	0.174283	NaN	NaN	NaN	NaN	NaN	NaN	NaN	NaN	NaN	NaN
67.5325	-43.9951	0.366089	0.355755	0.541548	0.419482	0.206871	0.247572	0.419136	0.165961	NaN	NaN	NaN	NaN	NaN	NaN	NaN	NaN	NaN	NaN
67.5358	-43.9941	0.359036	0.364077	0.528802	0.407899	0.206571	0.26287	0.419144	0.165964	NaN	NaN	NaN	NaN	NaN	NaN	NaN	NaN	NaN	NaN
67.5374	-43.9936	0.355525	0.368239	0.528809	0.396779	0.206472	0.262759	0.418989	0.174237	NaN	NaN	NaN	NaN	NaN	NaN	NaN	NaN	NaN	NaN
67.5407	-43.9926	0.352009	0.372418	0.522438	0.374343	0.202503	0.272707	0.41867	0.174112	NaN	NaN	NaN	NaN	NaN	NaN	NaN	NaN	NaN	NaN
67.5439	-43.9916	0.345002	0.37225	0.521806	0.373948	0.194988	0.282624	0.404249	0.190492	NaN	NaN	NaN	NaN	NaN	NaN	NaN	NaN	NaN	NaN
67.5456	-43.991	0.341514	0.372166	0.521493	0.373753	0.191239	0.292768	0.390163	0.19868	NaN	NaN	NaN	NaN	NaN	NaN	NaN	NaN	NaN	NaN
67.5488	-43.99	0.338034	0.367832	0.52721	0.362455	0.183752	0.313033	0.362033	0.231617	NaN	NaN	NaN	NaN	NaN	NaN	NaN	NaN	NaN	NaN
67.5505	-43.9895	0.338037	0.367834	0.520856	0.362268	0.180022	0.323146	0.34798	0.248076	NaN	NaN	NaN	NaN	NaN	NaN	NaN	NaN	NaN	NaN
67.5538	-43.9884	0.338039	0.367837	0.508157	0.361887	0.172562	0.343346	0.326922	0.272731	NaN	NaN	NaN	NaN	NaN	NaN	NaN	NaN	NaN	NaN
67.5554	-43.988	0.338042	0.367839	0.495471	0.372548	0.172479	0.348394	0.319912	0.280946	NaN	NaN	NaN	NaN	NaN	NaN	NaN	NaN	NaN	NaN
67.5587	-43.987	0.338044	0.367841	0.476472	0.382968	0.165047	0.368545	0.312907	0.289156	NaN	NaN	NaN	NaN	NaN	NaN	NaN	NaN	NaN	NaN
67.562	-43.986	0.338046	0.363591	0.463538	0.393371	0.164879	0.378607	0.319924	0.280956	NaN	NaN	NaN	NaN	NaN	NaN	NaN	NaN	NaN	NaN
67.5636	-43.9855	0.338049	0.359345	0.463253	0.393154	0.161176	0.383462	0.333837	0.272751	NaN	NaN	NaN	NaN	NaN	NaN	NaN	NaN	NaN	NaN
67.5669	-43.9845	0.338051	0.350867	0.462675	0.392713	0.161012	0.38312	0.368675	0.248104	NaN	NaN	NaN	NaN	NaN	NaN	NaN	NaN	NaN	NaN
67.5685	-43.984	0.338054	0.346636	0.462388	0.392494	0.160931	0.382952	0.38962	0.239964	NaN	NaN	NaN	NaN	NaN	NaN	NaN	NaN	NaN	NaN
67.5718	-43.983	0.338056	0.346638	0.462394	0.35949	0.167913	0.382784	0.417601	0.231907	NaN	NaN	NaN	NaN	NaN	NaN	NaN	NaN	NaN	NaN
67.5751	-43.982	0.338058	0.34664	0.462399	0.337522	0.174965	0.377602	0.445615	0.23216	NaN	NaN	NaN	NaN	NaN	NaN	NaN	NaN	NaN	NaN
67.5767	-43.9815	0.338061	0.346642	0.462405	0.326554	0.178489	0.362046	0.473292	0.232245	NaN	NaN	NaN	NaN	NaN	NaN	NaN	NaN	NaN	NaN
67.58	-43.9804	0.345037	0.338341	0.46241	0.326559	0.178492	0.315499	0.542016	0.24067	NaN	NaN	NaN	NaN	NaN	NaN	NaN	NaN	NaN	NaN
67.5817	-43.9799	0.34854	0.334191	0.456108	0.337358	0.178495	0.289752	0.576126	0.249021	NaN	NaN	NaN	NaN	NaN	NaN	NaN	NaN	NaN	NaN
67.585	-43.9789	0.355572	0.32589	0.443513	0.358923	0.178498	0.264071	0.60309	0.257282	NaN	NaN	NaN	NaN	NaN	NaN	NaN	NaN	NaN	NaN
67.5866	-43.9784	0.355574	0.325892	0.437226	0.369694	0.1785	0.264076	0.589006	0.273796	NaN	NaN	NaN	NaN	NaN	NaN	NaN	NaN	NaN	NaN
67.5899	-43.9774	0.355577	0.325894	0.430945	0.380455	0.178503	0.284645	0.512532	0.31479	NaN	NaN	NaN	NaN	NaN	NaN	NaN	NaN	NaN	NaN
67.5932	-43.9764	0.35558	0.330116	0.424937	0.380461	0.185737	0.300384	0.422316	0.355463	NaN	NaN	NaN	NaN	NaN	NaN	NaN	NaN	NaN	NaN
67.5948	-43.9759	0.359097	0.330203	0.42521	0.36971	0.18936	0.305694	0.387648	0.363392	NaN	NaN	NaN	NaN	NaN	NaN	NaN	NaN	NaN	NaN
67.5981	-43.9749	0.366157	0.330375	0.425751	0.359147	0.193089	0.305981	0.352989	0.354668	NaN	NaN	NaN	NaN	NaN	NaN	NaN	NaN	NaN	NaN
67.5998	-43.9744	0.369527	0.330462	0.426023	0.35935	0.189568	0.305987	0.352995	0.338064	NaN	NaN	NaN	NaN	NaN	NaN	NaN	NaN	NaN	NaN
67.6031	-43.9734	0.37283	0.326316	0.438643	0.359765	0.189764	0.301104	0.367134	0.305219	NaN	NaN	NaN	NaN	NaN	NaN	NaN	NaN	NaN	NaN
67.6064	-43.9724	0.372832	0.330544	0.445243	0.371193	0.18643	0.316897	0.381926	0.264441	NaN	NaN	NaN	NaN	NaN	NaN	NaN	NaN	NaN	NaN
67.608	-43.9719	0.372834	0.334776	0.445531	0.371404	0.18653	0.332592	0.375531	0.248106	NaN	NaN	NaN	NaN	NaN	NaN	NaN	NaN	NaN	NaN
67.6113	-43.9709	0.372836	0.343254	0.446092	0.393913	0.179634	0.358917	0.376571	0.215408	NaN	NaN	NaN	NaN	NaN	NaN	NaN	NaN	NaN	NaN
67.6129	-43.9703	0.372838	0.347501	0.44637	0.394141	0.179729	0.364298	0.383915	0.198988	NaN	NaN	NaN	NaN	NaN	NaN	NaN	NaN	NaN	NaN
67.6162	-43.9693	0.37284	0.347503	0.465388	0.405886	0.17281	0.359417	0.405251	0.182606	NaN	NaN	NaN	NaN	NaN	NaN	NaN	NaN	NaN	NaN
67.6195	-43.9682	0.372842	0.347506	0.484446	0.40655	0.162141	0.369845	0.405583	0.166064	NaN	NaN	NaN	NaN	NaN	NaN	NaN	NaN	NaN	NaN
67.6211	-43.9677	0.372844	0.347508	0.497165	0.407014	0.155016	0.375068	0.398679	0.166067	NaN	NaN	NaN	NaN	NaN	NaN	NaN	NaN	NaN	NaN
67.6244	-43.9667	0.372846	0.34751	0.516275	0.396559	0.147884	0.395958	0.385146	0.166189	NaN	NaN	NaN	NaN	NaN	NaN	NaN	NaN	NaN	NaN
67.6261	-43.9662	0.372848	0.347512	0.522658	0.396784	0.144314	0.401191	0.385302	0.166251	NaN	NaN	NaN	NaN	NaN	NaN	NaN	NaN	NaN	NaN
67.6293	-43.9652	0.37285	0.347514	0.529045	0.385869	0.144317	0.41166	0.378521	0.174663	NaN	NaN	NaN	NaN	NaN	NaN	NaN	NaN	NaN	NaN
67.631	-43.9647	0.372852	0.343271	0.535108	0.385875	0.144319	0.406434	0.378385	0.182952	NaN	NaN	NaN	NaN	NaN	NaN	NaN	NaN	NaN	NaN
67.6343	-43.9637	0.372854	0.334797	0.547209	0.385881	0.144321	0.395986	0.378104	0.199513	NaN	NaN	NaN	NaN	NaN	NaN	NaN	NaN	NaN	NaN
67.6375	-43.9627	0.372856	0.326341	0.546529	0.39659	0.147896	0.38555	0.370747	0.224336	NaN	NaN	NaN	NaN	NaN	NaN	NaN	NaN	NaN	NaN
67.6392	-43.9622	0.372858	0.326343	0.540166	0.396377	0.151467	0.385556	0.356625	0.240876	NaN	NaN	NaN	NaN	NaN	NaN	NaN	NaN	NaN	NaN
67.6425	-43.9612	0.37286	0.326345	0.527448	0.395944	0.1586	0.385563	0.321366	0.273801	NaN	NaN	NaN	NaN	NaN	NaN	NaN	NaN	NaN	NaN
67.6441	-43.9607	0.372862	0.326347	0.521091	0.395745	0.162163	0.38557	0.307283	0.281947	NaN	NaN	NaN	NaN	NaN	NaN	NaN	NaN	NaN	NaN
67.6474	-43.9597	0.369572	0.330497	0.508386	0.417506	0.162165	0.385577	0.286182	0.289974	NaN	NaN	NaN	NaN	NaN	NaN	NaN	NaN	NaN	NaN
67.6506	-43.9587	0.362677	0.338795	0.495701	0.439229	0.162168	0.385584	0.286187	0.281649	NaN	NaN	NaN	NaN	NaN	NaN	NaN	NaN	NaN	NaN
67.6523	-43.9581	0.359155	0.342945	0.495707	0.428134	0.165733	0.380367	0.300151	0.273423	NaN	NaN	NaN	NaN	NaN	NaN	NaN	NaN	NaN	NaN
67.6555	-43.9571	0.355642	0.347095	0.495714	0.405962	0.172853	0.369937	0.33511	0.232046	NaN	NaN	NaN	NaN	NaN	NaN	NaN	NaN	NaN	NaN
[truncated: 16,976 more rows]
